# Supplementary material for: Regioselective radical arylation: silver-mediated synthesis of 3-phosphorylated coumarins, quinolin-2(1H)-one and benzophosphole oxides
Source: Royal Society of Chemistry journal article supplement (doi:10.1039/c9ob01585j), 2019-01-01
Supplement: c9ob01585j1.pdf [file c9ob01585j1.pdf]

## Supporting Information

# Regioselective Radical Arylation: Silver-Mediated Synthesis of 3-Phosphorylated-Coumarins, Quinolin-2(1*H*)-one and Benzophosphole Oxides

Hong Hou,\* Yue Xu, Haibo Yang, Chaoguo Yan, Yaocheng Shi, and Shaoqun Zhu\*

School of Chemistry & Chemical Engineering, Yangzhou University, Yangzhou, China

|                                                                                                                |     |
|----------------------------------------------------------------------------------------------------------------|-----|
| General information                                                                                            | S2  |
| General procedure the phosphinylative cyclization of phenyl propiolate                                         | S2  |
| General procedure the phosphinylative cyclization of propynoic acid amide and propynoic alkyl ester            | S6  |
| Procedure the hydrophosphinylative cyclization of <i>N</i> ,3-diphenylpropiolamide with dibutylphosphine oxide | S10 |
| The reaction of 1,3-diphenylprop-2-yn-1-one <b>6</b> with <b>2a</b>                                            | S11 |
| References                                                                                                     | S12 |
| <sup>1</sup> H NMR, <sup>13</sup> C NMR, <sup>32</sup> P, and <sup>19</sup> F NMR spectra of products          | S13 |
| X-ray Structure of <b>3i</b>                                                                                   | S58 |
| X-ray Structure of <b>5g</b>                                                                                   | S59 |
| X-ray Structure of <b>5j</b>                                                                                   | S60 |

## 1. General information

Unless otherwise noted, all commercially available compounds were used as provided without further purification. Solvents used in reactions were p.A. grade and dried only if indicated. Solvents for chromatography were technical grade and distilled prior to use. Analytical thin-layer chromatography (TLC) was performed on Merck silica gel aluminium plates with F-254 indicator, visualized by irradiation with UV light. Column chromatography was performed using silica gel Merck 60 (particle size 0.063–0.2 mm). Melting points were measured on a Yanaco Micro Melting Point Apparatus.  $^1\text{H}$  NMR,  $^{13}\text{C}$  NMR,  $^{19}\text{F}$  NMR and  $^{31}\text{P}$  NMR were recorded on a Varian VNMNR 400 or Bruker AV-600 spectrometer in  $\text{CDCl}_3$ . For  $^1\text{H}$  NMR spectra, data are quoted in the following order: chemical shift ( $\delta$ ) in parts per million (ppm) downfield of tetramethylsilane, using residual protonated solvent as internal standard ( $\text{CDCl}_3$  at 7.26 ppm). Multiplicities are indicated s (singlet), d (doublet), t (triplet), m (multiplet), dd (doublet of doublets), dt (doublet of triplets); coupling constants ( $J$ ) are in Hertz (Hz). For proton-decoupled  $^{13}\text{C}$  NMR spectra, chemical shifts ( $\delta$ ) are also quoted in parts per million (ppm) downfield of tetramethylsilane, using deuterated solvent as internal standard ( $\text{CDCl}_3$  at 77.0 ppm). IR spectra were recorded on a Perkin Elmer Spectrum 100 FTIR (KBr disc) and are reported in terms of frequency of absorption ( $\text{cm}^{-1}$ ). High resolution mass spectra (HRMS) were obtained on AB 5800 MALDI-TOF/TOF and are recorded using electrospray ionization (ESI). X-ray crystallographic data were collected using SMART APEX II X-ray diffractometer. Compounds **1a-1g**, **4a-4f**, were prepared according to the previous reported procedures.<sup>[1]</sup> **2a-2h** were prepared according to the previous reported procedures.<sup>[2]</sup> **6** was prepared according to the previous reported procedures.<sup>[3]</sup>

## 2. General procedure the hydrophosphinylation cyclization of phenyl propiolate

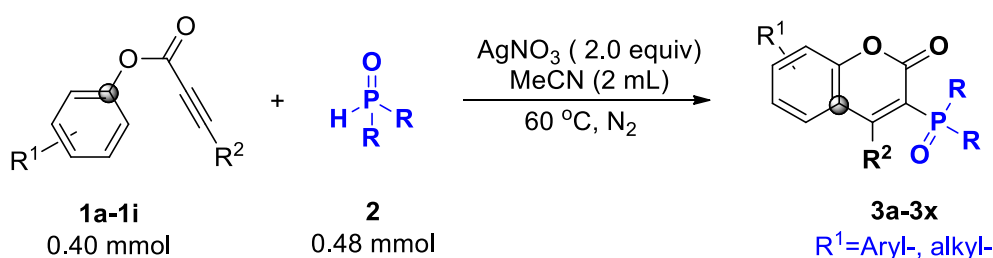

Aryl alkynoates **1a-1i** (0.40 mmol, 1.0 equiv), arylphosphine oxide **2** (0.48 mmol, 1.2 equiv),  $\text{AgNO}_3$  (0.80 mmol, 2.0 equiv) and a stir bar were added to a sealed tube under a nitrogen atmosphere, MeCN (2 mL) as solvent was then added. The mixture was stirred for 24–48 h at  $60\text{ }^\circ\text{C}$ . After the aryl alkynoates **1** was completely consumed (monitored by TLC), the crude mixture was directly purified by flash column chromatography on silica gel (EtOAc/petroleum ether 1:1) to give the desired products **3a-3l**.

### 3-(diphenylphosphoryl)-4-(3-methoxyphenyl)-2H-chromen-2-one (**3a**)<sup>[4]</sup>

Yellow oil (123 mg, 71% yield);  $^1\text{H}$  NMR (400 MHz,  $\text{CDCl}_3$ ):  $\delta$  7.81–7.68 (m, 4H), 7.55 (s, 1H), 7.47–7.23 (m, 8H), 7.16 (s, 2H), 6.91 (d,  $J = 8.3$  Hz, 1H), 6.83 (d,  $J = 7.4$  Hz, 1H), 6.70 (s, 1H), 3.71 (s, 3H);  $^{13}\text{C}$  NMR

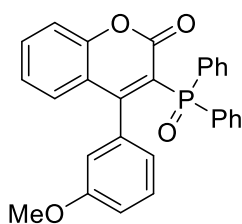

(100 MHz, CDCl<sub>3</sub>):  $\delta$  165.3 (d,  $J$  = 5.2 Hz), 159.5 (d,  $J$  = 13.1 Hz), 158.7, 154.2, 134.6 (d,  $J$  = 4.4 Hz), 133.7, 133.5 (d,  $J$  = 10.8 Hz), 132.4 (d,  $J$  = 10.8 Hz), 131.5, 131.4 (d,  $J$  = 3.0 Hz), 131.3 (d,  $J$  = 10.1 Hz), 128.9 (d,  $J$  = 22.3 Hz), 128.2 (d,  $J$  = 4.0 Hz), 128.0 (d,  $J$  = 4.0 Hz), 124.3, 121.0, 120.5 (d,  $J$  = 9.3 Hz), 118.8 (d,  $J$  = 1.4 Hz), 116.7, 114.7, 114.0, 55.0; <sup>31</sup>P NMR (243 MHz, CDCl<sub>3</sub>):  $\delta$  23.8; IR (neat):  $\nu$  = 3062, 2929, 1720, 1594, 1535, 1481, 1437, 1335, 1241, 1194, 756 cm<sup>-1</sup>; HRMS (ESI) Exact mass calculated for [C<sub>28</sub>H<sub>22</sub>O<sub>3</sub>P]<sup>+</sup> [M+H]<sup>+</sup>: 453.1250, found: 453.1256.

### 3-(diphenylphosphoryl)-4-phenyl-2H-chromen-2-one (3b)<sup>[4]</sup>

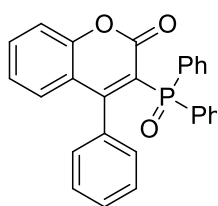

White solid (143.5 mg, 85% yield); m.p. 81-82 °C; <sup>1</sup>H NMR (400 MHz, CDCl<sub>3</sub>):  $\delta$  7.75 (t,  $J$  = 10.0 Hz, 4H), 7.59 (t,  $J$  = 7.6 Hz, 1H), 7.48 (d,  $J$  = 7.2 Hz, 2H), 7.42 (d,  $J$  = 7.3 Hz, 7H), 7.35 (d,  $J$  = 7.8 Hz, 1H), 7.24 (d,  $J$  = 6.4 Hz, 2H), 7.21 – 7.10 (m, 2H); <sup>13</sup>C NMR (CDCl<sub>3</sub>, 150 MHz):  $\delta$  165.9 (d,  $J$  = 5.2 Hz), 159.6 (d,  $J$  = 13.4 Hz), 154.3, 133.7, 133.6 (d,  $J$  = 4.3 Hz), 133.4, 132.3, 131.6 (d,  $J$  = 3.1 Hz), 131.5, 128.9 (d,  $J$  = 15.6 Hz), 128.2 (d,  $J$  = 4.6 Hz), 128.0 (d,  $J$  = 29.2 Hz), 124.4, 120.8 (d,  $J$  = 9.4 Hz), 119.3, 118.3, 116.7; <sup>31</sup>P NMR (243 MHz, CDCl<sub>3</sub>):  $\delta$  24.4; IR (neat):  $\nu$  = 3061, 2924, 2856, 1719, 1598, 1536, 1485, 1440, 1198, 1114, 914, 746 cm<sup>-1</sup>; HRMS (ESI) Exact mass calculated for [C<sub>27</sub>H<sub>20</sub>O<sub>3</sub>P]<sup>+</sup> [M+H]<sup>+</sup>: 423.1145, found: 423.1153.

### 3-(diphenylphosphoryl)-4-(2-methoxyphenyl)-2H-chromen-2-one (3c)

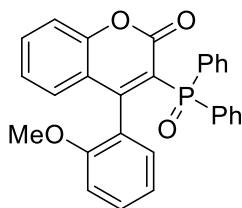

Yellow oil (91.7 mg, 51% yield); <sup>1</sup>H NMR (400 MHz, CDCl<sub>3</sub>):  $\delta$  7.83-7.71 (m, 4H), 7.55 (t,  $J$  = 7.6 Hz, 1H), 7.51–7.30 (m, 8H), 7.15 (t,  $J$  = 7.2 Hz, 2H), 7.11–7.00 (m, 2H), 6.83 (d,  $J$  = 8.3 Hz, 1H), 3.57 (s, 3H); <sup>13</sup>C NMR (CDCl<sub>3</sub>, 100 MHz):  $\delta$  163.4 (d,  $J$  = 5.0 Hz), 159.6 (d,  $J$  = 13.6 Hz), 155.9, 154.2, 133.37, 133.35 (d,  $J$  = 48.0 Hz), 132.3 (d,  $J$  = 48.0 Hz), 131.56 (d,  $J$  = 16.0 Hz), 131.57 (d,  $J$  = 4.0 Hz), 131.6 (d,  $J$  = 16.0 Hz), 131.3 (dd,  $J$  = 16.5, 2.8 Hz), 130.7, 129.4, 128.2 (d,  $J$  = 18.7 Hz), 127.9 (d,  $J$  = 7.1 Hz), 127.7, 124.2, 122.6 (d,  $J$  = 4.1 Hz), 120.5 (d,  $J$  = 11.7 Hz), 120.1, 116.6, 110.2, 55.0; <sup>31</sup>P NMR (243 MHz, CDCl<sub>3</sub>):  $\delta$  24.4; IR (neat):  $\nu$  = 3061, 2924, 2854, 1738, 1591, 1487, 1439, 1338, 1250, 1193, 1161, 793 cm<sup>-1</sup>; HRMS (ESI) Exact mass calculated for [C<sub>28</sub>H<sub>22</sub>O<sub>4</sub>P]<sup>+</sup> [M+H]<sup>+</sup>: 453.1250, found: 453.1251.

### 3-(diphenylphosphoryl)-4-(4-methoxyphenyl)-2H-chromen-2-one (3d)<sup>[4]</sup>

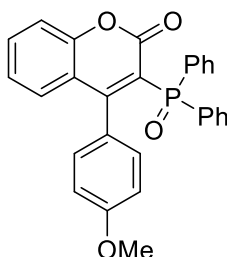

Yellow solid (130.0 mg, 72% yield); m.p. 114-115 °C; <sup>1</sup>H NMR (400 MHz, CDCl<sub>3</sub>):  $\delta$  7.74 (dd,  $J$  = 12.2, 7.7 Hz, 4H), 7.56 (t,  $J$  = 7.4 Hz, 1H), 7.47–7.41 (m, 2H), 7.36 (dd,  $J$  = 21.2, 7.9 Hz, 5H), 7.24–7.10 (m, 4H), 6.87 (d,  $J$  = 7.9 Hz, 2H), 3.83 (s, 3H); <sup>13</sup>C NMR (100 MHz, CDCl<sub>3</sub>):  $\delta$  165.8 (d,  $J$  = 5.3), 160.2, 159.7 (d,  $J$  = 13.4 Hz), 154.3, 133.7 (d,  $J$  = 13.9 Hz), 132.7, 131.41 (d,  $J$  = 10.0 Hz), 131.41 (d,  $J$  = 3.0 Hz), 130.1, 128.8, 128.1 (d,  $J$  = 12.7 Hz), 125.7 (d,  $J$  = 4.4 Hz), 124.3, 122.0 (d,  $J$  = 9.3 Hz), 119.4, 118.3, 116.8, 113.4, 55.2; <sup>31</sup>P NMR (243 MHz, CDCl<sub>3</sub>):  $\delta$  24.2; IR (neat):  $\nu$  = 3060, 2926, 1719, 1602, 1507, 1443, 1339, 1251, 1188, 854, 743 cm<sup>-1</sup>; HRMS (ESI) Exact mass calculated for [C<sub>28</sub>H<sub>22</sub>O<sub>4</sub>P]<sup>+</sup>

$[M+H]^+$ : 453.1250, found: 453.1253.

#### 4-(4-chlorophenyl)-3-(diphenylphosphoryl)-2H-chromen-2-one (3e)<sup>41</sup>

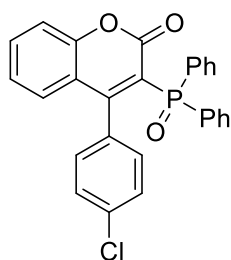

Yellow solid (125 mg, 68% yield); m.p. 242-243 °C; <sup>1</sup>H NMR (400 MHz, CDCl<sub>3</sub>): δ 7.76 (dd, *J* = 12.4, 7.7 Hz, 4H), 7.59 (t, *J* = 7.7 Hz, 1H), 7.49 (t, *J* = 6.9 Hz, 2H), 7.45–7.32 (m, 7H), 7.17 (d, *J* = 8.2 Hz, 3H), 7.09 (d, *J* = 8.0 Hz, 1H); <sup>13</sup>C NMR (100 MHz, CDCl<sub>3</sub>): δ 164.6 (d, *J* = 5.0 Hz), 159.3 (d, *J* = 13.1 Hz), 154.3, 135.1, 133.9, 133.1, 132.0, 131.9, 131.7 (d, *J* = 2.9 Hz), 131.5 (d, *J* = 10.3 Hz), 129.6, 128.5, 128.3, 128.2, 124.5, 120.5 (d, *J* = 9.1 Hz), 116.8; <sup>31</sup>P NMR (243 MHz, CDCl<sub>3</sub>): δ 24.8; IR (neat):  $\nu$  = 3063, 2927, 2225, 1721, 1599, 1536, 1486, 1193, 1105, 740 cm<sup>-1</sup>; HRMS (ESI) Exact mass calculated for [C<sub>27</sub>H<sub>19</sub>ClO<sub>3</sub>P]<sup>+</sup> [M+H]<sup>+</sup>: 457.0755, found: 457.0767.

#### 3-(diphenylphosphoryl)-8-methyl-4-phenyl-2H-chromen-2-one (3f)

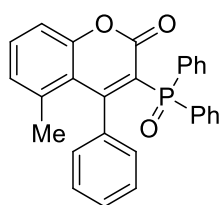

**3f**

Yellow oil (86 mg, 50% yield); <sup>1</sup>H NMR (400 MHz, CDCl<sub>3</sub>): δ 7.88–7.69 (m, 4H), 7.60–7.29 (m, 9H), 7.22 (dd, *J* = 14.5, 6.5 Hz, 2H), 7.13 (dd, *J* = 15.0, 7.6 Hz, 1H), 7.03 (d, *J* = 7.4 Hz, 1H), 6.94 (d, *J* = 8.0 Hz, 1H), 2.12 (s, 3H); <sup>13</sup>C NMR (100 MHz, CDCl<sub>3</sub>): δ 166.1 (d, *J* = 5.3 Hz), 159.6 (d, *J* = 13.7 Hz), 154.1, 134.7, 133.7, 133.5 (d, *J* = 3.9 Hz), 133.0 (d, *J* = 8.0 Hz), 131.9 (d, *J* = 9.3 Hz), 131.51, 131.50 (t, *J* = 20.0 Hz), 129.2 (d, *J* = 74.4 Hz), 128.0, 128.04 (d, *J* = 25.0 Hz), 127.5, 125.2, 124.5, 120.1 (d, *J* = 9.5 Hz), 118.6 (d, *J* = 101.0 Hz), 116.6, 20.0; <sup>31</sup>P NMR (243 MHz, CDCl<sub>3</sub>): δ 24.5; IR (neat):  $\nu$  = 3063, 2925, 1719, 1598, 1538, 1441, 1330, 1260, 1194, 1116, 915, 741 cm<sup>-1</sup>; HRMS (ESI) Exact mass calculated for [C<sub>28</sub>H<sub>22</sub>O<sub>3</sub>P]<sup>+</sup> [M+H]<sup>+</sup>: 437.1301, found: 437.1307.

#### 4-(cyclohexa-2,4-dien-1-yl)-3-(diphenylphosphoryl)-6-methyl-2H-chromen-2-one (3g)

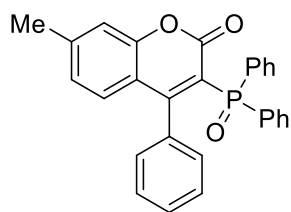

Yellow solid (101mg, 58% yield); m.p. 96-97 °C; <sup>1</sup>H NMR (400 MHz, CDCl<sub>3</sub>): δ 7.81–7.71 (m, 4H), 7.49–7.43 (m, 2H), 7.39 (d, *J* = 6.8 Hz, 7H), 7.21 (d, *J* = 6.6 Hz, 2H), 7.14 (s, 1H), 6.97 (s, 2H), 2.43 (s, 3H); <sup>13</sup>C NMR (100 MHz, CDCl<sub>3</sub>): δ 165.9 (d, *J* = 5.4 Hz), 159.8 (d, *J* = 13.7 Hz), 154.4, 145.5, 133.7 (d, *J* = 4.5 Hz), 133.6, 132.5, 131.5, 131.4 (d, *J* = 2.6 Hz), 128.6 (d, *J* = 36.1 Hz), 128.2, 128.1, 128.0, 127.7, 125.6, 118.4 (d, *J* = 9.2 Hz), 116.7, 21.7; <sup>31</sup>P NMR (243 MHz, CDCl<sub>3</sub>): δ 24.4; IR (neat):  $\nu$  = 3059, 2924, 1718, 1614, 1526, 1439, 1341, 1264, 1196, 1114, 916, 734 cm<sup>-1</sup>; HRMS (ESI) Exact mass calculated for [C<sub>28</sub>H<sub>22</sub>O<sub>3</sub>P]<sup>+</sup> [M+H]<sup>+</sup>: 437.1301, found: 437.1304.

#### 3-(dibutylphosphoryl)-7-methyl-4-phenyl-2H-chromen-2-one (3h)

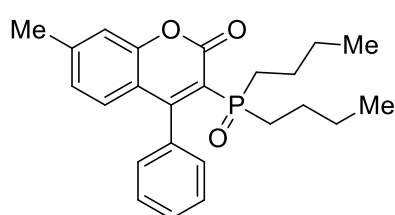

Yellow oil (73.8 mg, 47% yield); <sup>1</sup>H NMR (400 MHz, CDCl<sub>3</sub>): δ 7.46–7.42 (m, 3H), 7.23–7.18 (m, 2H), 7.17 (s, 1H), 6.96 (d, *J* = 8.2 Hz, 1H), 6.87 (d, *J* = 8.2 Hz, 1H), 2.44 (s, 3H), 2.21–2.08 (m, 2H), 2.01–1.87 (m, 2H), 1.66–1.53 (m, 2H), 1.49–1.31 (m, 6H), 0.86 (t, *J* = 7.2 Hz, 6H); <sup>13</sup>C NMR (100 MHz, CDCl<sub>3</sub>): δ 166.1 (d, *J* = 3.6 Hz), 160.4 (d,

$J = 14.5$  Hz), 153.9, 145.2, 133.9 (d,  $J = 3.6$  Hz), 128.4, 127.8, 127.5, 125.7, 118.9, 118.8, 116.7 (d,  $J = 7.8$  Hz), 115.8, 29.4 (d,  $J = 71.6$  Hz), 24.1 (d,  $J = 16.1$  Hz), 23.7 (d,  $J = 4.3$  Hz), 21.7 (d,  $J = 10.3$  Hz), 13.6 (d,  $J = 4.4$  Hz);  $^{31}\text{P}$  NMR (243 MHz,  $\text{CDCl}_3$ ):  $\delta$  43.8; IR (neat):  $\nu = 3053, 2947, 1709, 1609, 1532, 1456, 1336, 1198, 1088, 906, 782$   $\text{cm}^{-1}$ ; HRMS (ESI) Exact mass calculated for  $[\text{C}_{24}\text{H}_{29}\text{NaO}_3\text{P}]^+ [\text{M}+\text{Na}]^+$ : 419.1747, found: 419.1746.

### 6-(tert-butyl)-3-(diphenylphosphoryl)-4-phenyl-2H-chromen-2-one (3i)

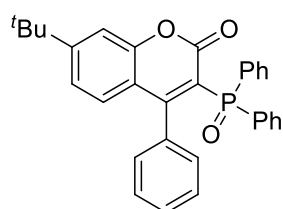

Yellow solid (116 mg, 61% yield); m.p. 225–228 °C;  $^1\text{H}$  NMR (400 MHz,  $\text{CDCl}_3$ ):  $\delta$  7.81–7.71 (m, 4H), 7.46 (t,  $J = 7.1$  Hz, 2H), 7.37 (dd,  $J = 14.8, 7.9$  Hz, 8H), 7.22 (dd,  $J = 12.6, 6.6$  Hz, 3H), 7.04 (d,  $J = 8.4$  Hz, 1H), 1.32 (s, 9H);  $^{13}\text{C}$  NMR (100 MHz,  $\text{CDCl}_3$ ):  $\delta$  165.8 (d,  $J = 5.3$  Hz), 159.9 (d,  $J = 13.5$  Hz), 158.6, 154.3, 133.7 (d,  $J = 4.3$  Hz), 133.6, 132.5, 131.5 (d,  $J = 10.3$  Hz), 128.6 (d,  $J = 47.5$  Hz), 128.2 (d,  $J = 6.7$  Hz), 128.0, 127.7, 122.0, 118.4 (d,  $J = 9.4$  Hz), 117.9, 116.9, 113.4, 35.3, 30.8;  $^{31}\text{P}$  NMR (243 MHz,  $\text{CDCl}_3$ ):  $\delta$  24.6; IR (neat):  $\nu = 3062, 2962, 1719, 1607, 1522, 1341, 1198, 1111, 1003, 915, 736$   $\text{cm}^{-1}$ ; HRMS (ESI) Exact mass calculated for  $[\text{C}_{31}\text{H}_{28}\text{O}_3\text{P}]^+ [\text{M}+\text{H}]^+$ : 479.1771, found: 479.1776.

### 7-(tert-butyl)-3-(di-p-tolylphosphoryl)-4-phenyl-2H-chromen-2-one (3j)

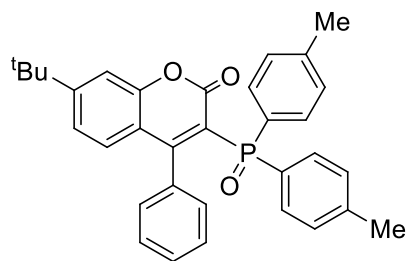

Yellow oil (121.9 mg, 60% yield);  $^1\text{H}$  NMR (400 MHz,  $\text{CDCl}_3$ ):  $\delta$  7.64 (dd,  $J = 12.4, 8.0$  Hz, 4H), 7.42–7.35 (m, 3H), 7.33 (d,  $J = 1.3$  Hz, 1H), 7.22 (s, 1H), 7.19 (d,  $J = 8.3$  Hz, 6H), 7.03 (d,  $J = 8.5$  Hz, 1H), 2.35 (s, 6H), 1.31 (s, 9H);  $^{13}\text{C}$  NMR (100 MHz,  $\text{CDCl}_3$ ):  $\delta$  165.3 (d,  $J = 5.2$  Hz), 159.8 (d,  $J = 13.5$  Hz), 158.3, 154.2, 141.7 (d,  $J = 2.7$  Hz), 133.8 (d,  $J = 4.2$  Hz), 131.5 (q,  $J = 10.9$  Hz), 130.4, 129.7, 129.2, 128.6 (q,  $J = 24.6$  Hz), 127.6 (d,  $J = 8.8$  Hz), 127.5, 121.8 (d,  $J = 6.2$  Hz), 118.3 (t,  $J = 7.2$  Hz), 117.2, 113.3 (d,  $J = 14.4$  Hz), 35.2, 30.7 (q,  $J = 7.3$  Hz), 21.4 (q,  $J = 12.0$  Hz);  $^{31}\text{P}$  NMR (243 MHz,  $\text{CDCl}_3$ ):  $\delta$  25.1; IR (neat):  $\nu = 3030, 2962, 2220, 1719, 1612, 1523, 1404, 1340, 916, 812, 731$   $\text{cm}^{-1}$ ; HRMS (ESI) Exact mass calculated for  $[\text{C}_{33}\text{H}_{31}\text{NaO}_3\text{P}]^+ [\text{M}+\text{Na}]^+$ : 529.1903, found: 529.1892.

### 3-(bis(4-methoxyphenyl)phosphoryl)-7-(tert-butyl)-4-phenyl-2H-chromen-2-one (3k)

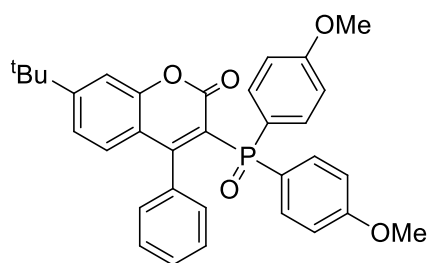

Yellow oil (132.5 mg, 62% yield);  $^1\text{H}$  NMR (400 MHz,  $\text{CDCl}_3$ ):  $\delta$  7.42 (dd,  $J = 12.0, 8.7$  Hz, 4H), 7.14 (d,  $J = 6.4$  Hz, 3H), 7.06 (s, 1H), 6.95 (d,  $J = 6.0$  Hz, 2H), 6.92 (s, 1H), 6.76 (d,  $J = 8.5$  Hz, 1H), 6.63 (dd,  $J = 8.5, 1.7$  Hz, 4H), 3.54 (s, 6H), 1.05 (s, 9H);  $^{13}\text{C}$  NMR (100 MHz,  $\text{CDCl}_3$ ):  $\delta$  165.0 (d,  $J = 5.0$  Hz), 162.0 (d,  $J = 2.5$  Hz), 160.0 (d,  $J = 13.5$  Hz), 158.3, 154.2, 134.0 (d,  $J = 54.2$  Hz), 133.3 (q,  $J = 11.8$  Hz), 128.2, 128.1 (d,  $J = 14.9$  Hz), 127.6 (d,  $J = 16$  Hz), 125.1, 123.9, 121.8 (d,  $J = 11.3$  Hz), 118.5 (d,  $J = 9.9$  Hz), 117.5, 113.4 (q,  $J = 15.6$  Hz), 55.1 (q,  $J = 18.1$  Hz), 35.2, 30.88, 30.80, 30.7 (q,  $J = 7.8$  Hz);  $^{31}\text{P}$  NMR (243 MHz,  $\text{CDCl}_3$ ):  $\delta$  24.3; IR (neat):  $\nu = 3064, 2961, 2218, 1718, 1596, 1503, 1295, 1252, 1182, 1113, 731$   $\text{cm}^{-1}$ ; HRMS (ESI) Exact mass calculated for  $[\text{C}_{33}\text{H}_{31}\text{NaO}_5\text{P}]^+ [\text{M}+\text{Na}]^+$ : 561.1801,

found: 561.1792.

### 3-(diphenylphosphoryl)-4-methyl-2H-chromen-2-one (3l)

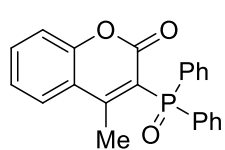

Yellow oil (105 mg, 73% yield); <sup>1</sup>H NMR (400 MHz, CDCl<sub>3</sub>): δ 7.78–7.70 (m, 4H), 7.59 (d, *J* = 6.7 Hz, 1H), 7.54 (d, *J* = 7.5 Hz, 4H), 7.38 (t, *J* = 7.3 Hz, 2H), 7.10 (d, *J* = 7.7 Hz, 2H), 6.69 (d, *J* = 20.4 Hz, 1H), 2.35 (d, *J* = 13.5 Hz, 3H); <sup>13</sup>C NMR (CDCl<sub>3</sub>, 100 MHz): δ 163.2 (d, *J* = 25.3 Hz), 152.4, 151.5, 150.2, 132.6 (d, *J* = 2.6 Hz), 132.0 (d, *J* = 10.0 Hz), 130.0, 129.9, 129.8, 129.5, 128.9 (d, *J* = 12.1 Hz), 126.1, 121.4, 15.8 (d, *J* = 8.1 Hz); <sup>31</sup>P NMR (243 MHz, CDCl<sub>3</sub>): δ 31.4; IR (neat): ν = 3063, 2933, 2840, 1717, 1599, 1539, 1335, 1192, 1114, 913, 743 cm<sup>-1</sup>; HRMS (ESI) Exact mass calculated for [C<sub>22</sub>H<sub>18</sub>O<sub>3</sub>P]<sup>+</sup> [M+H]<sup>+</sup>: 361.0988, found: 361.0991.

### 3. General procedure the hydrophosphinylation cyclization of propynoic acid amide

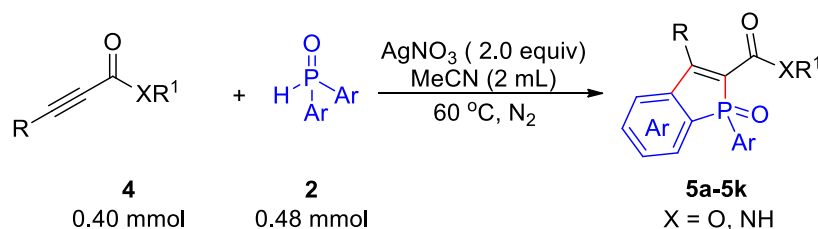

Propynoic alkyl ester **1j-1m** or aryl propargyl amide **4a-4e** (0.40 mmol, 1.0 equiv), arylphosphine oxide **2** (0.48 mmol, 1.2 equiv), AgNO<sub>3</sub> (0.80 mmol, 2.0 equiv) and a stir bar were added to a sealed tube under a nitrogen atmosphere, MeCN (2 mL) as solvent was then added. The mixture was stirred for 24–48 h at 60 °C. After the **4** was completely consumed (monitored by TLC), the crude mixture was directly purified by flash column chromatography on silica gel (EtOAc/petroleum ether 1:1) to give the desired products **5a-5k**.

### 3-(diphenylphosphoryl)-4-phenylquinolin-2(1H)-one (5a)<sup>[5]</sup>

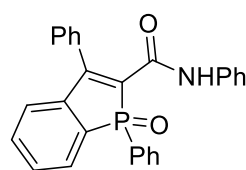

Yellow solid (161.6 mg, 95% yield); m.p. 177–179 °C; <sup>1</sup>H NMR (400 MHz, CDCl<sub>3</sub>): δ 8.73 (s, 1H), 7.84–7.69 (m, 3H), 7.59–7.46 (m, 8H), 7.44 (t, *J* = 7.3 Hz, 4H), 7.22 (dd, *J* = 14.4, 6.7 Hz, 3H), 7.03 (t, *J* = 7.4 Hz, 1H); <sup>13</sup>C NMR (100 MHz, CDCl<sub>3</sub>): δ 160.2 (d, *J* = 12.7 Hz), 158.9 (d, *J* = 14.8 Hz), 142.7 (d, *J* = 26.2 Hz), 137.6, 133.4 (d, *J* = 2.0 Hz), 132.9 (d, *J* = 2.8 Hz), 131.0, 130.9, 129.5, 129.4, 129.3, 129.1, 129.0, 128.7, 128.6, 128.2, 127.6, 126.1, 126.0, 124.3, 120.0; <sup>31</sup>P NMR (243 MHz, CDCl<sub>3</sub>): δ 39.9; IR (neat): ν = 3236, 3057, 2924, 1666, 1599, 1544, 1441, 1319, 1190, 1117, 742 cm<sup>-1</sup>; HRMS (ESI) Exact mass calculated for [C<sub>27</sub>H<sub>21</sub>NO<sub>2</sub>P]<sup>+</sup> [M+H]<sup>+</sup>: 422.1304, found: 422.1315.

### 3-(diphenylphosphoryl)-8-methyl-4-phenylquinolin-2(1H)-one (5b)

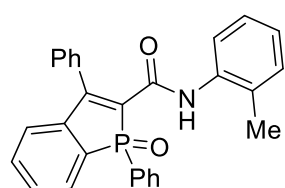

Yellow solid (104.4 mg, 60% yield); m.p. 115–116 °C; <sup>1</sup>H NMR (400 MHz, CDCl<sub>3</sub>): δ 8.68 (s, 1H), 7.93 (d, *J* = 8.0 Hz, 1H), 7.86–7.69 (m, 3H), 7.62–7.42 (m, 10H), 7.14–6.93 (m, 4H), 2.19 (s, 3H); <sup>13</sup>C NMR (100 MHz, CDCl<sub>3</sub>): δ 160.2 (d, *J* = 12.6 Hz), 159.3 (d, *J* = 17.8 Hz), 143.9 (d, *J* = 26.2 Hz), 135.9, 133.5 (d,

$J = 2.0$  Hz), 132.9 (d,  $J = 4.0$  Hz), 131.12, 131.08, 131.01, 131.00, 130.3, 129.5, 129.4, 129.3, 129.2, 129.1, 128.6, 128.3, 126.5, 126.15, 126.06, 124.6, 122.0, 17.7;  $^{31}\text{P}$  NMR (243 MHz,  $\text{CDCl}_3$ ):  $\delta$  40.0; IR (neat):  $\nu = 3205, 3059, 2924, 2855, 1669, 1530, 1450, 1308, 1190, 1117, 914, 741$   $\text{cm}^{-1}$ ; HRMS (ESI) Exact mass calculated for  $[\text{C}_{28}\text{H}_{23}\text{NO}_2\text{P}]^+ [\text{M}+\text{H}]^+$ : 436.1461, found: 436.1466.

### 3-(diphenylphosphoryl)-7-methyl-4-phenylquinolin-2(1H)-one (5c)

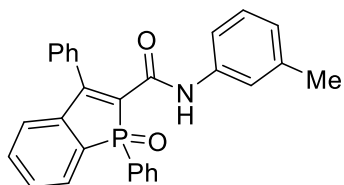

Yellow solid (104.5 mg, 60% yield); m.p. 68-69 °C;  $^1\text{H}$  NMR (400 MHz,  $\text{CDCl}_3$ ):  $\delta$  8.71 (s, 1H), 7.87-7.70 (m, 3H), 7.51 (dt,  $J = 16.1, 7.6$  Hz, 10H), 7.34 (s, 1H), 7.23-7.09 (m, 3H), 6.86 (d,  $J = 7.5$  Hz, 1H), 2.26 (s, 3H);  $^{13}\text{C}$  NMR (100 MHz,  $\text{CDCl}_3$ ):  $\delta$  160.1 (d,  $J = 13.8$  Hz), 159.0 (d,  $J = 18.1$  Hz), 142.9 (d,  $J = 26.2$  Hz), 138.8, 137.6, 133.5 (d,  $J = 32.0$  Hz), 132.9 (d,  $J = 2.9$  Hz), 132.8, 132.7, 131.1, 130.1, 129.52, 129.48, 129.4, 129.2, 129.1, 128.6, 128.2, 126.1, 126.0, 125.1, 120.6, 117.0, 21.4;  $^{31}\text{P}$  NMR (243 MHz,  $\text{CDCl}_3$ ):  $\delta$  40.0; IR (neat):  $\nu = 3062, 2924, 2316, 1673, 1553, 1491, 1443, 1313, 1190, 1117, 732$   $\text{cm}^{-1}$ ; HRMS (ESI) Exact mass calculated for  $[\text{C}_{28}\text{H}_{23}\text{NO}_2\text{P}]^+ [\text{M}+\text{H}]^+$ : 436.1461, found: 436.1466.

### 3-(diphenylphosphoryl)-6-methyl-4-phenylquinolin-2(1H)-one (5d)

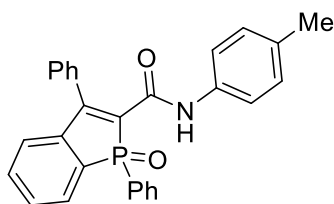

Yellow solid (146.2 mg, 84% yield); m.p. 87-89 °C;  $^1\text{H}$  NMR (400 MHz,  $\text{CDCl}_3$ ):  $\delta$  8.67 (s, 1H), 7.85-7.68 (m, 3H), 7.55-7.39 (m, 9H), 7.36-7.20 (m, 4H), 7.03 (t,  $J = 7.8$  Hz, 2H), 2.24 (s, 3H);  $^{13}\text{C}$  NMR (100 MHz,  $\text{CDCl}_3$ ):  $\delta$  160.0 (d,  $J = 12.4$  Hz), 158.6 (d,  $J = 18.1$  Hz), 142.7 (d,  $J = 26.0$  Hz), 135.1, 133.9, 133.4 (d,  $J = 1.9$  Hz), 132.8 (d,  $J = 2.9$  Hz), 131.0, 130.9, 129.5, 129.4, 129.3, 129.2 (One carbon is missing due to the single overlap), 129.1, 129.0, 128.5, 128.2, 126.0, 125.9, 119.9, 20.8;  $^{31}\text{P}$  NMR (243 MHz,  $\text{CDCl}_3$ ):  $\delta$  39.8; IR (neat):  $\nu = 3053, 2924, 1667, 1601, 1526, 1319, 1251, 1191, 1115, 817, 705$   $\text{cm}^{-1}$ ; HRMS (ESI) Exact mass calculated for  $[\text{C}_{28}\text{H}_{23}\text{NO}_2\text{P}]^+ [\text{M}+\text{H}]^+$ : 436.1461, found: 436.1469.

### 3-(diphenylphosphoryl)-4-phenyl-6-(trifluoromethyl)quinolin-2(1H)-one (5e)

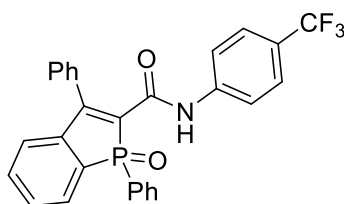

Yellow solid (171.1 mg, 87% yield); m.p. 101-103 °C;  $^1\text{H}$  NMR (400 MHz,  $\text{CDCl}_3$ ):  $\delta$  9.01 (s, 1H), 7.76 (d = 12.4, 7.6 Hz, 3H), 7.52 (t,  $J = 10.0$  Hz, 8H), 7.50 (s, 6H), 7.26 (s, 1H);  $^{13}\text{C}$  NMR (100 MHz,  $\text{CDCl}_3$ ):  $\delta$  160.5 (d,  $J = 12.8$  Hz), 159.9 (d,  $J = 17.7$  Hz), 142.7 (d,  $J = 25.9$  Hz), 140.7, 133.6 (d,  $J = 1.8$  Hz), 133.1 (d,  $J = 2.8$  Hz), 132.5, 132.4, 131.5, 131.3, 131.2, 131.0, 130.9, 129.7, 129.54, 129.45, 129.3, 129.1, 128.6, 128.2, 126.4, 126.3, 126.1 (q,  $J = 3.7$  Hz), 119.6;  $^{31}\text{P}$  NMR (243 MHz,  $\text{CDCl}_3$ ):  $\delta$  40.0;  $^{19}\text{F}$  NMR (565 MHz,  $\text{CDCl}_3$ ):  $\delta$  -62.2; IR (neat):  $\nu = 3049, 2929, 1674, 1604, 1541, 1411, 1323, 1181, 1117, 1067, 841, 732$   $\text{cm}^{-1}$ ; HRMS (ESI) Exact mass calculated for  $[\text{C}_{28}\text{H}_{20}\text{F}_3\text{NO}_2\text{P}]^+ [\text{M}+\text{H}]^+$ : 490.1178, found: 490.1182.

### 3-(di-p-tolylphosphoryl)-4-phenylquinolin-2(1H)-one (5f)

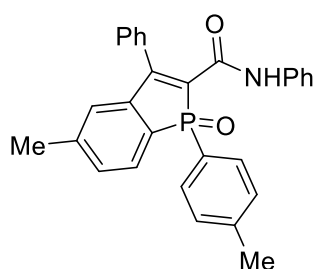

Yellow solid (95.2 mg, 53% yield); m.p. 281-283 °C;  $^1\text{H}$  NMR (400 MHz,  $\text{CDCl}_3$ ):  $\delta$  8.83 (s, 1H), 7.73–7.58 (m, 3H), 7.48 (dd,  $J = 19.1, 11.4$  Hz, 7H), 7.31 (s, 1H), 7.25–7.19 (m, 3H), 7.10–6.97 (m, 3H), 2.37 (s, 6H);  $^{13}\text{C}$  NMR (100 MHz,  $\text{CDCl}_3$ ):  $\delta$  160.3 (d,  $J = 12.7$  Hz), 158.7 (d,  $J = 18.0$  Hz), 144.3 (d,  $J = 2.1$  Hz), 143.6 (d,  $J = 2.9$  Hz), 143.2, 143.0, 137.7, 131.6, 131.5, 131.1, 131.0, 129.9, 129.8, 129.4, 128.7, 128.5, 128.2, 126.9, 126.8, 124.2, 120.0, 21.9, 21.6;  $^{31}\text{P}$  NMR (243 MHz,  $\text{CDCl}_3$ ):  $\delta$  40.0; IR (neat):  $\nu = 3049, 2926, 2859, 1670, 1599, 1544, 1391, 1319, 1253, 1186, 912, 740$   $\text{cm}^{-1}$ ; HRMS (ESI) Exact mass calculated for  $[\text{C}_{29}\text{H}_{25}\text{NO}_2\text{P}]^+ [\text{M}+\text{H}]^+$ : 450.1617, found: 450.1620.

### 3-(bis(4-methoxyphenyl)phosphoryl)-4-phenylquinolin-2(1H)-one (5g)

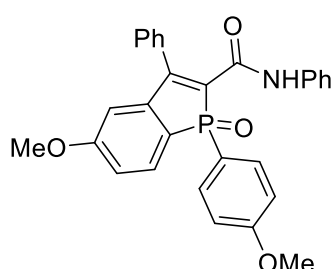

Yellow solid (95 mg, 50% yield); m.p. 210-212 °C;  $^1\text{H}$  NMR (400 MHz,  $\text{CDCl}_3$ ):  $\delta$  8.88 (s, 1H), 7.66 (dd,  $J = 19.1, 9.8$  Hz, 3H), 7.52–7.40 (m, 7H), 7.22 (t,  $J = 8.6$  Hz, 2H), 7.03 (t,  $J = 7.2$  Hz, 1H), 6.94 (t,  $J = 9.5$  Hz, 3H), 6.74 (s, 1H), 3.79 (s, 3H), 3.78 (s, 3H);  $^{13}\text{C}$  NMR (100 MHz,  $\text{CDCl}_3$ ):  $\delta$  164.0 (d,  $J = 1.8$  Hz), 163.3 (d,  $J = 3.0$  Hz), 160.3 (d,  $J = 12.2$  Hz), 157.6 (d,  $J = 17.4$  Hz), 145.4 (d,  $J = 28.0$  Hz), 137.7, 133.0 (td,  $J = 26.7$  Hz,  $J = 5.8$  Hz), 131.0, 130.9, 129.4, 128.7, 128.5, 128.2, 124.2, 120.0, 114.8, 114.6, 114.1, 114.0, 113.4, 113.3, 55.6, 55.3;  $^{31}\text{P}$  NMR (243 MHz,  $\text{CDCl}_3$ ):  $\delta$  38.9; IR (neat):  $\nu = 3051, 2939, 2844, 1667, 1592, 1499, 1315, 1254, 1183, 1115, 910, 740$   $\text{cm}^{-1}$ ; HRMS (ESI) Exact mass calculated for  $[\text{C}_{29}\text{H}_{25}\text{NO}_4\text{P}]^+ [\text{M}+\text{H}]^+$ : 482.1516, found: 482.1525.

### 3-(bis(4-fluorophenyl)phosphoryl)-4-phenylquinolin-2(1H)-one (5h)

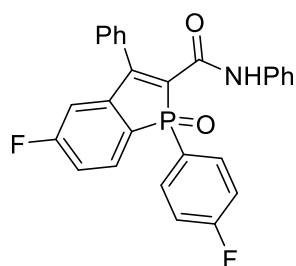

Yellow solid (90 mg, 49% yield); m.p. 119-121 °C;  $^1\text{H}$  NMR (400 MHz,  $\text{CDCl}_3$ ):  $\delta$  8.65 (s, 1H), 7.86–7.60 (m, 3H), 7.55 (s, 2H), 7.49 (s, 2H), 7.40 (d,  $J = 7.5$  Hz, 2H), 7.26–7.20 (m, 2H), 7.17 (d,  $J = 8.2$  Hz, 2H), 7.06 (d,  $J = 7.3$  Hz, 1H), 6.95 (d,  $J = 7.0$  Hz, 3H);  $^{13}\text{C}$  NMR (100 MHz,  $\text{CDCl}_3$ ):  $\delta$  167.3 (d,  $J = 48.5$  Hz), 164.8 (d,  $J = 44.9$  Hz), 159.8 (d,  $J = 12.2$  Hz), 156.9 (d,  $J = 19.1$  Hz), 146.0 (d,  $J = 8.7$  Hz), 145.7 (d,  $J = 8.9$  Hz), 137.4, 133.7, 133.66 (d,  $J = 3.6$  Hz), 133.5, 131.9, 131.8, 131.5 (d,  $J = 3.0$ ), 131.4 (d,  $J = 1.0$ ), 130.0, 128.9, 128.8, 128.1, 124.5, 120.0, 118.0 (d,  $J = 12.0$  Hz), 117.8 (d,  $J = 12.0$  Hz), 116.9 (d,  $J = 14.0$  Hz), 116.7 (d,  $J = 14.0$  Hz), 114.3 (d,  $J = 12.0$ ), 114.0 (d,  $J = 12.0$ );  $^{31}\text{P}$  NMR (243 MHz,  $\text{CDCl}_3$ ):  $\delta$  37.1;  $^{19}\text{F}$  NMR (565 MHz,  $\text{CDCl}_3$ ):  $\delta$  -103.0, -104.4; IR (neat):  $\nu = 3060, 1667, 1593, 1548, 1499, 1444, 1321, 1195, 1112, 910, 740$   $\text{cm}^{-1}$ ; HRMS (ESI) Exact mass calculated for  $[\text{C}_{27}\text{H}_{19}\text{F}_2\text{NO}_2\text{P}]^+ [\text{M}+\text{H}]^+$ : 458.1116, found: 458.1124.

### 3-(bis(3-methoxyphenyl)phosphoryl)-4-phenylquinolin-2(1H)-one (5i)

Colorless solid (101 mg, 52% yield); m.p. 152–154 °C;  $^1\text{H}$  NMR (400 MHz,  $\text{CDCl}_3$ ):  $\delta$  8.50 (s, 1H), 7.51 (s, 3H), 7.47 (s, 2H), 7.39 (d,  $J = 7.8$  Hz, 3H), 7.31–7.23 (m, 3H), 7.20 (t,  $J = 7.4$  Hz, 2H), 7.14 (d,  $J = 8.6$  Hz,



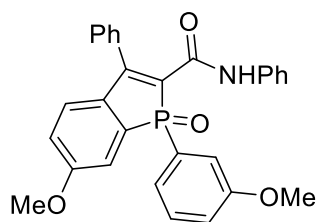

1H), 7.09 – 6.98 (m, 2H), 6.96 (d,  $J = 8.6$  Hz, 1H), 3.83 (s, 3H), 3.79 (s, 3H);  $^{13}\text{C}$  NMR (100 MHz,  $\text{CDCl}_3$ ):  $\delta$  162.2 (d,  $J = 13.8$  Hz), 160.3 (d,  $J = 12.6$  Hz), 159.8 (d,  $J = 15.7$  Hz), 159.6 (d,  $J = 17.9$  Hz), 137.7, 134.8 (d,  $J = 25.9$  Hz), 134.0, 133.0, 132.9, 130.4, 130.3, 129.5, 128.8, 128.6, 128.1, 127.5 (d,  $J = 12.8$  Hz), 124.2, 122.7 (d,  $J = 11.2$  Hz), 119.9, 118.8 (d,  $J = 2.5$  Hz), 118.76, 118.5 (dd,  $J = 66.7$  Hz,  $J = 2.5$  Hz), 115.6 (dd,  $J = 78.8$  Hz,  $J = 10.9$  Hz), 55.81, 55.40;  $^{31}\text{P}$  NMR (243 MHz,  $\text{CDCl}_3$ ):  $\delta$  39.07; IR (neat):  $\nu = 3060, 2923, 2851, 1748, 1662, 1596, 1548, 1480, 1432, 1315, 1242, 1185, 1036, 912, 854, 743$   $\text{cm}^{-1}$ ; HRMS (ESI) Exact mass calculated for  $[\text{C}_{29}\text{H}_{25}\text{NO}_4\text{P}]^+ [\text{M}+\text{H}]^+$ : 482.1516, found: 482.1527.

### 3-(bis(3,5-dimethylphenyl)phosphoryl)-4-phenylquinolin-2(1H)-one (5j)

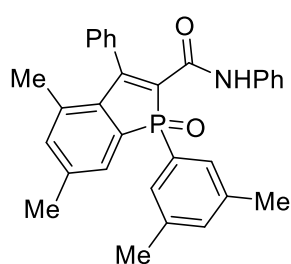

Yellow solid (147 mg, 77% yield); m.p. 254-256 °C;  $^1\text{H}$  NMR (400 MHz,  $\text{CDCl}_3$ ):  $\delta$  8.55 (s, 1H), 7.50 (d,  $J = 7.5$  Hz, 4H), 7.41 (s, 1H), 7.36 (d,  $J = 8.7$  Hz, 4H), 7.30 (s, 1H), 7.18 (d,  $J = 9.6$  Hz, 3H), 7.06–6.94 (m, 2H), 2.31 (s, 12H);  $^{13}\text{C}$  NMR (100 MHz,  $\text{CDCl}_3$ ):  $\delta$  161.5 (d,  $J = 17.7$  Hz), 160.4 (d,  $J = 12.0$  Hz), 141.6, 141.5, 138.9, 138.7, 138.2 (d,  $J = 1.9$  Hz), 137.8, 137.6, 137.4, 136.8 (d,  $J = 13.3$  Hz), 134.7 (d,  $J = 3.0$  Hz), 129.2, 128.8, 128.7, 128.4 (d,  $J = 10.9$  Hz), 128.2 (d,  $J = 10.1$  Hz), 127.9, 126.3, 124.0, 119.9, 21.3, 21.14, 21.07, 20.98;  $^{31}\text{P}$  NMR (243 MHz,  $\text{CDCl}_3$ ):  $\delta$  36.0; IR (neat):  $\nu = 3045, 2926, 2857, 1671, 1601, 1545, 1443, 1318, 1257, 1183, 909, 743$   $\text{cm}^{-1}$ ; HRMS (ESI) Exact mass calculated for  $[\text{C}_{31}\text{H}_{29}\text{NO}_2\text{P}]^+ [\text{M}+\text{H}]^+$ : 478.1930, found: 478.1926.

### 3-(bis(2-methoxyphenyl)phosphoryl)-4-phenylquinolin-2(1H)-one (5k)

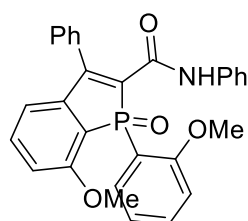

Yellow solid (91.8 mg, 48% yield); m.p. 185-186 °C;  $^1\text{H}$  NMR (400 MHz,  $\text{CDCl}_3$ ):  $\delta$  8.95 (s, 1H), 8.10 (dd,  $J = 14.4, 7.6$  Hz, 1H), 7.45 (dd,  $J = 19.6, 7.7$  Hz, 9H), 7.21 (t,  $J = 7.4$  Hz, 2H), 7.08 (t,  $J = 7.4$  Hz, 1H), 7.00 (t,  $J = 7.3$  Hz, 1H), 6.94 (t,  $J = 7.0$  Hz, 1H), 6.85–6.75 (m, 2H), 3.82 (s, 3H), 3.53 (s, 3H);  $^{13}\text{C}$  NMR (100 MHz,  $\text{CDCl}_3$ ):  $\delta$  160.9 (d,  $J = 4.6$  Hz), 160.5 (d,  $J = 3.0$  Hz), 160.8, 157.5, 157.3, 145.1 (d,  $J = 24.6$  Hz), 138.1, 135.1, 135.05, 134.5 (d,  $J = 1.9$  Hz), 133.5 (d,  $J = 14.0$  Hz), 129.0, 128.7, 128.3 (d,  $J = 5.9$  Hz), 123.9, 121.1 (d,  $J = 12.2$  Hz), 119.8, 118.6 (d,  $J = 11.5$  Hz), 116.9, 116.6, 115.8, 113.5 (d,  $J = 6.3$  Hz), 111.1 (d,  $J = 6.9$  Hz), 56.1, 55.5;  $^{31}\text{P}$  NMR (243 MHz,  $\text{CDCl}_3$ )  $\delta$  42.2; IR (neat) :  $\nu = 3056, 2932, 2849, 1670, 1587, 1472, 1266, 1181, 911, 743$   $\text{cm}^{-1}$ ; HRMS (ESI) Exact mass calculated for  $[\text{C}_{29}\text{H}_{25}\text{NO}_4\text{P}]^+ [\text{M}+\text{H}]^+$ : 482.1516, found: 482.1523.

### methyl 1,3-diphenylphosphindole-2-carboxylate 1-oxide (5l)

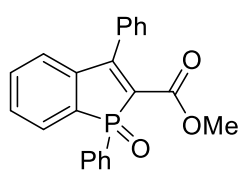

Yellow oil (72.5 mg, 50% yield);  $^1\text{H}$  NMR (600 MHz,  $\text{CDCl}_3$ ):  $\delta$  7.81–7.70 (m, 3H), 7.58–7.50 (m, 6H), 7.46 (s, 2H), 7.39 (s, 2H), 7.22 (s, 1H), 3.59 (s, 3H);  $^{13}\text{C}$  NMR (150 MHz,  $\text{CDCl}_3$ ):  $\delta$  164.5 (d,  $J = 18.5$  Hz), 163.0 (d,  $J = 12.3$  Hz), 142.1 (d,  $J = 24.9$  Hz), 133.1, 133.0, 132.9 (d,  $J = 8.1$  Hz), 132.5 (d,  $J = 2.7$  Hz), 131.8 (d,  $J = 10.7$  Hz), 131.0 (d,  $J = 11.0$  Hz), 129.5 (d,  $J = 9.6$  Hz), 129.4, 128.8 (d,  $J = 12.9$  Hz), 128.3, 127.9, 126.5 (d,  $J =$

10.5 Hz), 126.1, 125.5, 52.0;  $^{31}\text{P}$  NMR (243 MHz,  $\text{CDCl}_3$ )  $\delta$  35.8; IR (neat) :  $\nu$  = 3059, 2925, 2849, 1720, 1561, 1487, 1314, 1219, 1077, 758, 703  $\text{cm}^{-1}$ ; HRMS (ESI) Exact mass calculated for  $[\text{C}_{22}\text{H}_{18}\text{O}_3\text{P}]^+ [\text{M}+\text{H}]^+$ : 361.0988, found: 361.0992.

#### ethyl 1,3-diphenylphosphindole-2-carboxylate 1-oxide (5m)

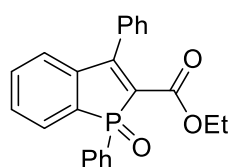

Yellow gum (99.1 mg, 66% yield);  $^1\text{H}$  NMR (600 MHz,  $\text{CDCl}_3$ ):  $\delta$  7.83–7.70 (m, 3H), 7.58–7.48 (m, 6H), 7.46 (s, 2H), 7.39 (s, 2H), 7.23 (s, 1H), 4.11–3.94 (m, 2H), 0.97 (d,  $J$  = 4.4 Hz, 3H);  $^{13}\text{C}$  NMR (150 MHz,  $\text{CDCl}_3$ ):  $\delta$  163.8 (d,  $J$  = 18.3 Hz), 162.4 (d,  $J$  = 12.3 Hz), 142.2 (d,  $J$  = 24.9 Hz), 133.0, 132.9, 132.8, 132.3 (d,  $J$  = 2.6 Hz), 131.6 (d,  $J$  = 10.7 Hz), 131.0 (d,  $J$  = 11.0 Hz), 129.4 (d,  $J$  = 9.6 Hz), 129.2, 128.6 (d,  $J$  = 12.8 Hz), 128.2, 127.8, 126.6, 126.3 (d,  $J$  = 10.5 Hz), 125.9, 60.7, 13.5;  $^{31}\text{P}$  NMR (243 MHz,  $\text{CDCl}_3$ )  $\delta$  35.8; IR (neat) :  $\nu$  = 3060, 2984, 1714, 1562, 1444, 1311, 1217, 1079, 758, 703  $\text{cm}^{-1}$ ; HRMS (ESI) Exact mass calculated for  $[\text{C}_{23}\text{H}_{20}\text{O}_3\text{P}]^+ [\text{M}+\text{H}]^+$ : 375.1145, found: 375.1149.

#### isopropyl 1,3-diphenylphosphindole-2-carboxylate 1-oxide (5n)

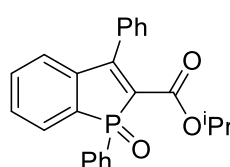

Yellow solid (120.3 mg, 78% yield); m.p. 142–144  $^\circ\text{C}$ ;  $^1\text{H}$  NMR (600 MHz,  $\text{CDCl}_3$ ):  $\delta$  7.82–7.69 (m, 3H), 7.52 (m, 6H), 7.45 (s, 2H), 7.38 (s, 2H), 7.21 (s, 1H), 4.85 (d,  $J$  = 5.8 Hz, 1H), 1.08 (d,  $J$  = 25.7 Hz, 3H), 0.82 (d,  $J$  = 64.4 Hz, 3H);  $^{13}\text{C}$  NMR (150 MHz,  $\text{CDCl}_3$ ):  $\delta$  163.2 (d,  $J$  = 18.3 Hz), 162.0 (d,  $J$  = 12.5 Hz), 142.2 (d,  $J$  = 25.1 Hz), 133.1 (d,  $J$  = 13.0 Hz), 133.0, 132.2 (d,  $J$  = 2.6 Hz), 131.5 (d,  $J$  = 10.5 Hz), 131.0 (d,  $J$  = 11.0 Hz), 129.4 (d,  $J$  = 9.6 Hz), 129.1, 128.7 (d,  $J$  = 28.2 Hz), 128.5, 128.1, 127.8, 127.1, 126.5, 126.2 (d,  $J$  = 10.4 Hz), 68.6, 21.3, 21.2;  $^{31}\text{P}$  NMR (243 MHz,  $\text{CDCl}_3$ )  $\delta$  35.7; IR (neat) :  $\nu$  = 3061, 2981, 1711, 1560, 1446, 1307, 1217, 1076, 756, 705  $\text{cm}^{-1}$ ; HRMS (ESI) Exact mass calculated for  $[\text{C}_{24}\text{H}_{22}\text{O}_3\text{P}]^+ [\text{M}+\text{H}]^+$ : 389.1301, found: 389.1305.

#### benzyl 1,3-diphenylphosphindole-2-carboxylate 1-oxide (5o)

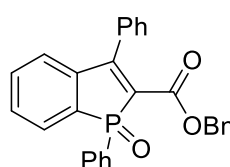

Yellow oil (160.6 mg, 92% yield);  $^1\text{H}$  NMR (600 MHz,  $\text{CDCl}_3$ ):  $\delta$  7.75–7.67 (m, 3H), 7.49 (m, 6H), 7.37 (s, 4H), 7.21 (s, 2H), 7.17 (d,  $J$  = 6.7 Hz, 2H), 6.90 (d,  $J$  = 6.0 Hz, 2H), 5.12 (d,  $J$  = 12.6 Hz, 1H), 4.96 (d,  $J$  = 12.6 Hz, 1H);  $^{13}\text{C}$  NMR (150 MHz,  $\text{CDCl}_3$ ):  $\delta$  164.2 (d,  $J$  = 18.2 Hz), 162.2 (d,  $J$  = 12.3 Hz), 142.0 (d,  $J$  = 24.8 Hz), 135.1, 133.0, 132.9, 132.8, 132.2, 131.7 (d,  $J$  = 10.7 Hz), 131.0 (d,  $J$  = 11.0 Hz), 129.4 (d,  $J$  = 9.6 Hz), 129.3, 128.6 (d,  $J$  = 12.9 Hz), 128.1 (d,  $J$  = 22.2 Hz), 127.8, 127.65, 127.60, 126.4 (d,  $J$  = 10.4 Hz), 126.2, 125.5, 66.3;  $^{31}\text{P}$  NMR (243 MHz,  $\text{CDCl}_3$ )  $\delta$  35.7; IR (neat) :  $\nu$  = 3061, 2931, 1719, 1559, 1446, 1310, 1215, 1161, 1076, 753, 702  $\text{cm}^{-1}$ ; HRMS (ESI) Exact mass calculated for  $[\text{C}_{28}\text{H}_{22}\text{O}_3\text{P}]^+ [\text{M}+\text{H}]^+$ : 437.1301, found: 437.1300.

#### 4. Procedure the phosphinylation cyclization of *N*,3-diphenylpropiolamide with dibutylphosphine oxide

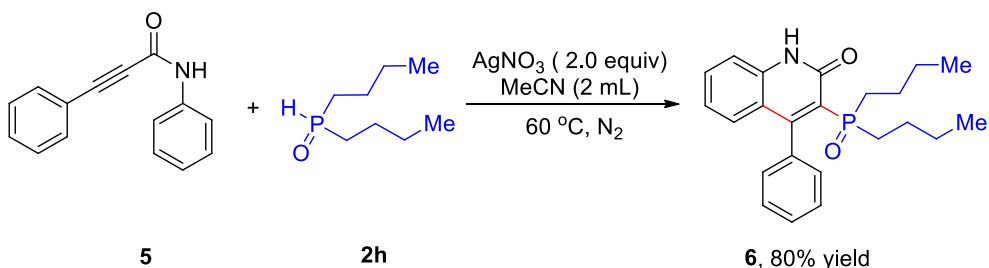

*N*,3-diphenylpropiolamide **5** (0.40 mmol, 1.0 equiv), dibutylphosphine oxide **2h** (0.48 mmol, 1.2 equiv), AgNO<sub>3</sub> (0.80 mmol, 2.0 equiv) and a stir bar were added to a sealed tube under a nitrogen atmosphere, MeCN (2 mL) as solvent was then added. The mixture was stirred for 48 h at 60 °C. After the **5** was completely consumed (monitored by TLC), the crude mixture was directly purified by flash column chromatography on silica gel (EtOAc/petroleum ether 1:1) to give the desired products **3-(dibutylphosphoryl)-4-phenylquinolin-2(1H)-one (6)** as Yellow oil (122,0 mg, 80% yield); <sup>1</sup>H NMR (400 MHz, CDCl<sub>3</sub>): δ 7.73 (s, 1H), 7.64 (d, *J* = 18.2 Hz, 1H), 7.48 (s, 2H), 7.35 (s, 2H), 7.30 (d, *J* = 2.8 Hz, 3H), 7.13 (d, *J* = 5.7 Hz, 1H), 2.06 (s, 1H), 1.97 (dd, *J* = 17.6, 9.4 Hz, 3H), 1.60 (m, 4H), 1.44–1.35 (m, 4H), 0.87 (t, *J* = 7.1 Hz, 6H); <sup>13</sup>C NMR (100 MHz, CDCl<sub>3</sub>): δ 165.4 (d, *J* = 16.1 Hz), 145.2 (d, *J* = 3.7 Hz), 137.1, 133.6 (d, *J* = 13.8 Hz), 132.0 (d, *J* = 78.2 Hz), 130.2, 129.3, 129.0, 128.9, 127.4 (d, *J* = 38.1 Hz), 125.0, 124.0, 120.3, 28.4 (d, *J* = 68.9 Hz), 24.1 (d, *J* = 15.0 Hz), 23.5 (d, *J* = 34.5 Hz), 13.6; <sup>31</sup>P NMR (243 MHz, CDCl<sub>3</sub>): δ 42.1; IR (neat): ν = 3030, 2953, 1664, 1602, 1543, 1448, 1314, 1162, 906, 752 cm<sup>-1</sup>; HRMS (ESI) Exact mass calculated for [C<sub>23</sub>H<sub>28</sub>NNaO<sub>2</sub>P]<sup>+</sup> [M+Na]<sup>+</sup>: 404.1750, found: 404.1687.

### 5. The reaction of 1,3-diphenylprop-2-yn-1-one **6** with **2a**

The reaction of 1,3-diphenylprop-2-yn-1-one **6** with **2a** gave an inseparable mixture **7** and **8** in 58% combined yield (in 1:1 ratio).

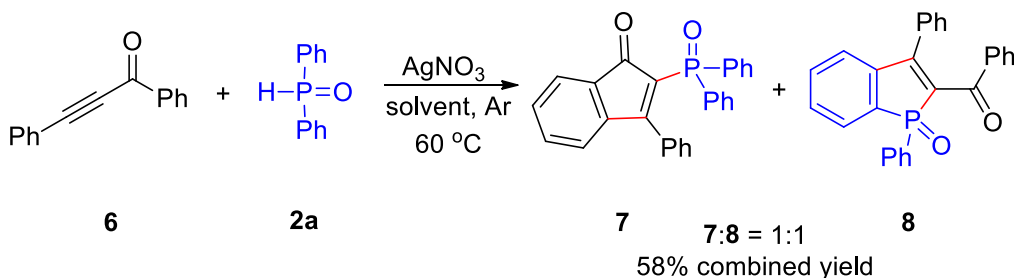

<sup>1</sup>H NMR (600 MHz, CDCl<sub>3</sub>) δ 7.75–7.70 (m, 2H), 7.67 (d, *J* = 7.6 Hz, 2H), 7.46 (s, 0H), 7.41 (d, *J* = 7.8 Hz, 2H), 7.34 (d, *J* = 8.0 Hz, 1H), 7.28 (d, *J* = 6.9 Hz, 2H), 7.23 (d, *J* = 4.6 Hz, 1H), 7.19 (s, 1H), 7.13 (t, *J* = 6.9 Hz, 1H); <sup>13</sup>C NMR (151 MHz, CDCl<sub>3</sub>) δ 194.93, 194.86, 193.17, 193.12, 173.45, 173.41, 156.09, 155.98, 144.49, 144.40, 141.77, 141.61, 136.86, 133.57, 133.22, 133.12, 133.07, 132.55, 132.53, 132.50, 131.47, 131.40, 131.23, 131.16, 131.11, 130.63, 130.56, 130.35, 129.57, 129.49, 128.82, 128.74, 128.53, 128.16, 128.08, 127.94, 125.33, 125.26, 123.31, 123.25; <sup>31</sup>P NMR (243 MHz, CDCl<sub>3</sub>): δ 18.3, 38.2; HRMS (ESI) Exact mass calculated for [C<sub>27</sub>H<sub>19</sub>O<sub>2</sub>P]<sup>+</sup> [M+Na]<sup>+</sup>: 429.1020, found: 429.1008.

## 6. References

1. (a) W. Gao, T. Liu, B. Zhang, X. Li, W. Wei, Q. Liu, J. Tian and H. Chang, *J. Org. Chem.*, 2016, **81**, 11297–11304; (b) K. Park, T. Palani, A. Pyo and S. Lee. *Tetrahedron Lett.*, 2012, **53**, 733–737; (c) T. Kawate, N. Iwase, M. Shimizu, S. A. Stanley, Samantha. Wellington, E. Kazyanskaya, D. T. Hung, *Bioorg. Med. Chem. Lett.* 2013, **23**, 6052-6059; (d) V. Lellek and H.-J. Hansen, *Helv. Chim. Acta*, 2001, **84**, 3548–3580.
2. (a) C. C. Chen, and J. Waser, *Chem. Commun.*, 2014, **50**, 12923–12926; (b) P. Peng, L. Peng, G. Wang, F. Wang, Y. Luo, and A. Lei, *Org. Chem. Front.*, 2016, **3**, 749–752; (c) C. A. Busacca, J. C. Lorenz, N. Grinberg, N. Haddad, M. Hrapchak, B. Latli, H. Lee, P. Sabila, A. Saha, M. Sarvestani, S. Shen, R. Varsolona, X. Wei, C. H. Senanayake, *Org. Lett.* 2005, **19**, 4277–4280.
3. K. Okamoto, T. Shimbayashi, E. Tamura, K. Ohe, *Org. Lett.* 2015, **17**, 5843–5845.
4. D. Liu, J.-Q. Chen, X.-Z. Wang, P.-F. Xu, *Adv. Synth. Catal.* **2017**, **359**, 2773–2777.
5. P. Zhang, Y. Gao, L. Zhang, Z. Li, Y. Liu, G. Tang, Y. Zhao, *Adv. Synth. Catal.* **2016**, **358**, 138–142.

7.  $^1\text{H}$  NMR,  $^{13}\text{C}$  NMR,  $^{32}\text{P}$ , and  $^{19}\text{F}$  NMR spectra of products

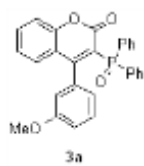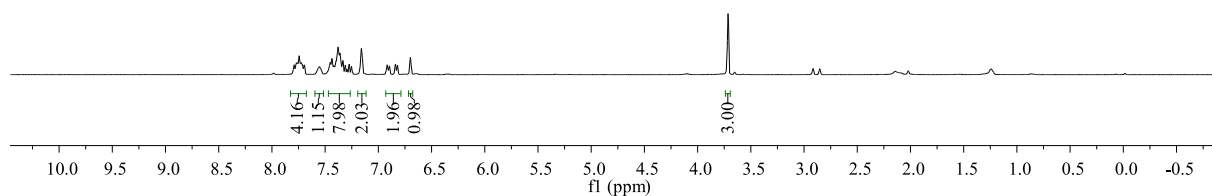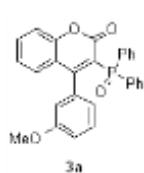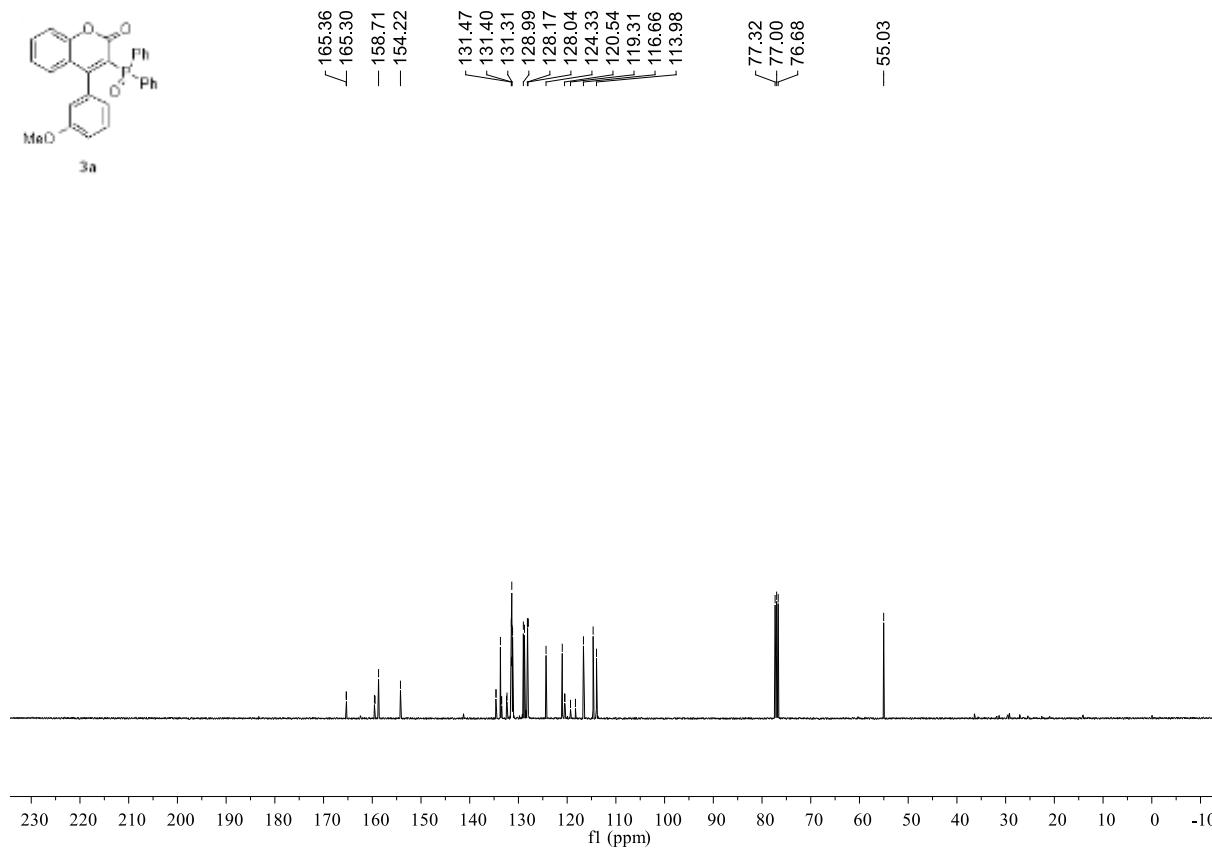

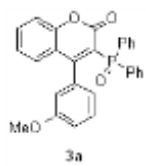

- 23.84

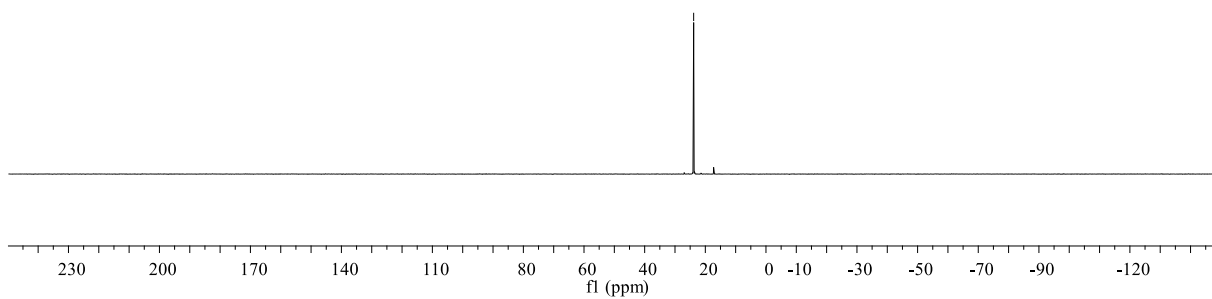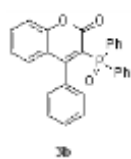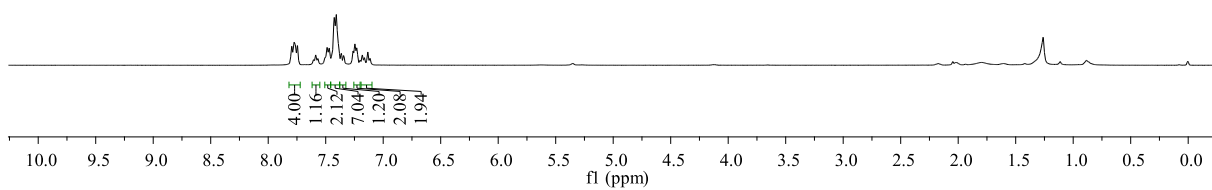

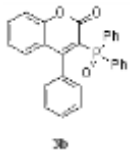

165.93  
 165.87  
 159.53  
 154.28  
 131.58  
 128.27  
 128.22  
 128.09  
 127.80  
 124.37  
 120.88  
 120.78  
 119.26  
 118.25  
 116.73  
 77.32  
 77.00  
 76.68

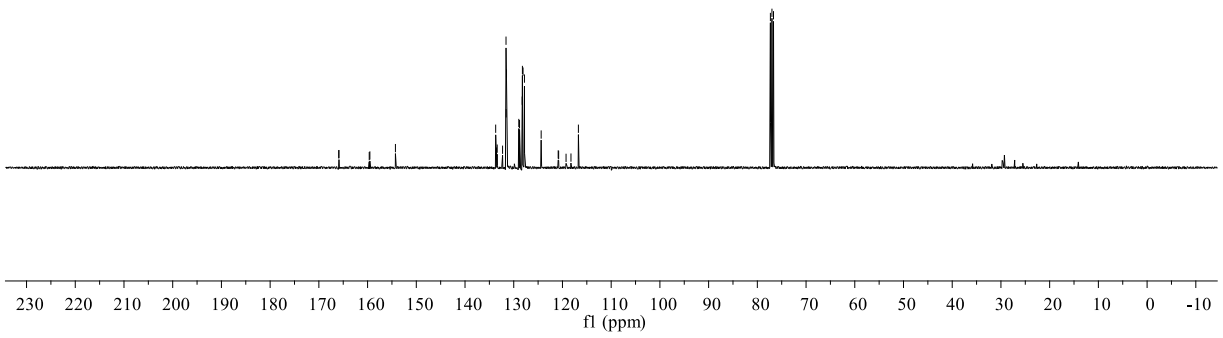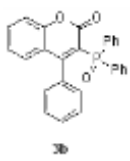

24.43

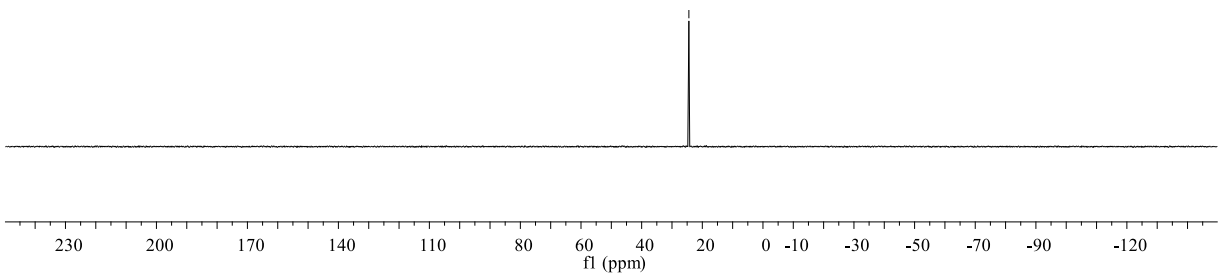

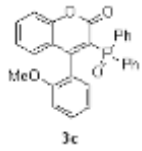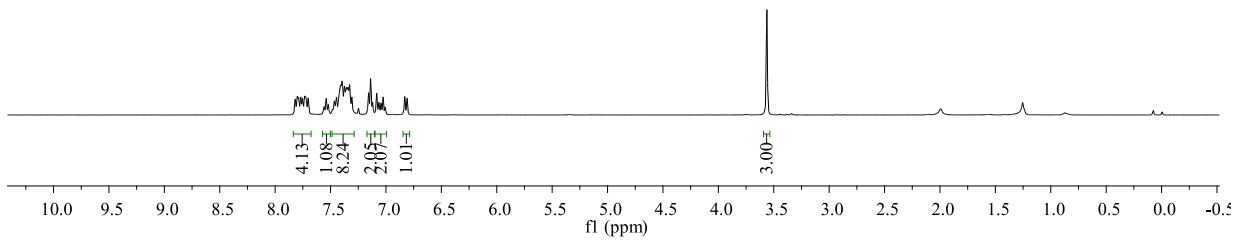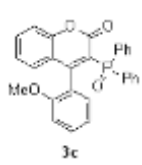

- 163.43
- 163.38
- 159.67
- 159.54
- 155.88
- 154.24
- 131.49
- 131.23
- 129.35
- 127.93
- 124.22
- 120.56
- 116.58
- 110.21
- 77.32
- 77.00
- 76.68
- 54.99

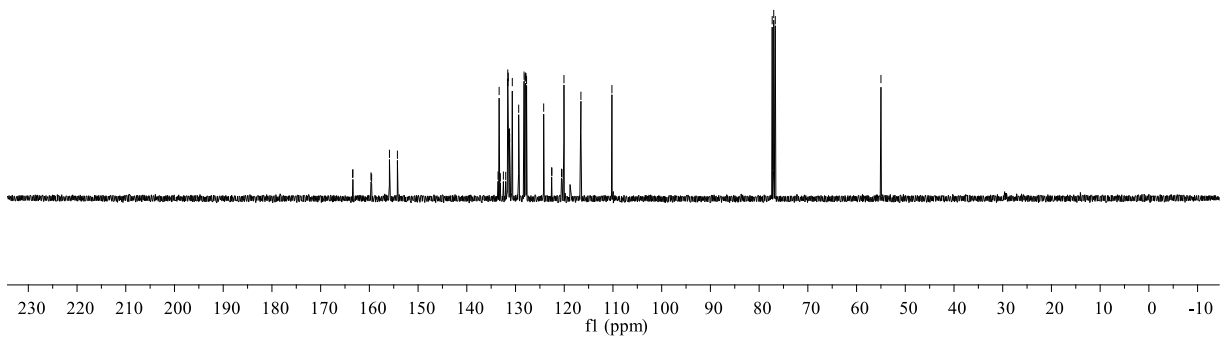



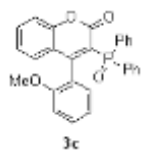

— 24.44

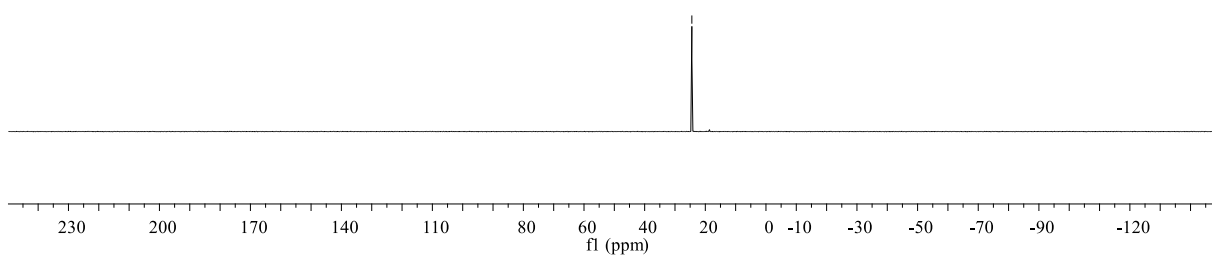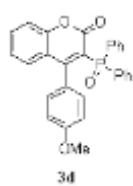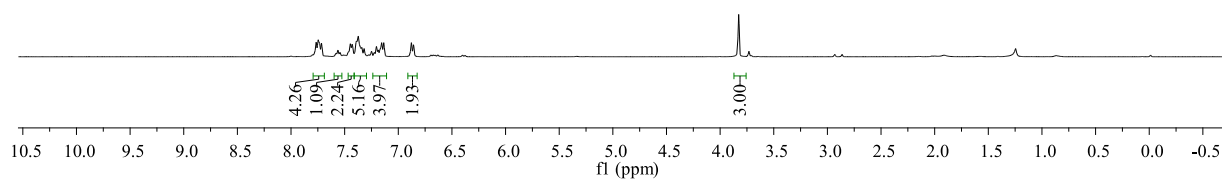

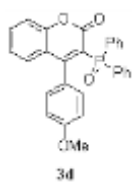

165.79  
 165.74  
 159.59  
 154.31  
 131.44  
 128.05  
 125.65  
 125.60  
 124.29  
 121.00  
 120.90  
 119.33  
 118.31  
 116.76  
 113.33  
 77.32  
 77.00  
 76.68  
 55.19

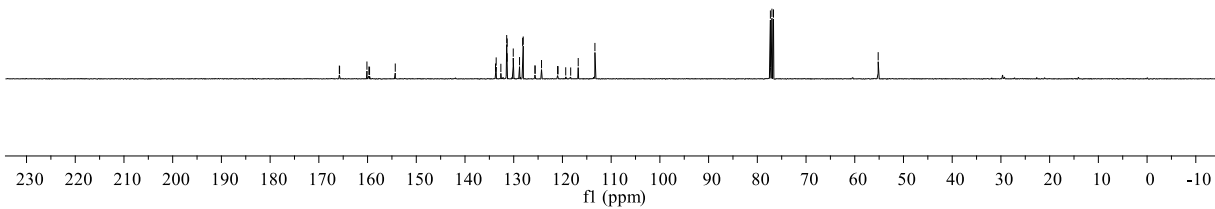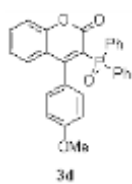

24.15

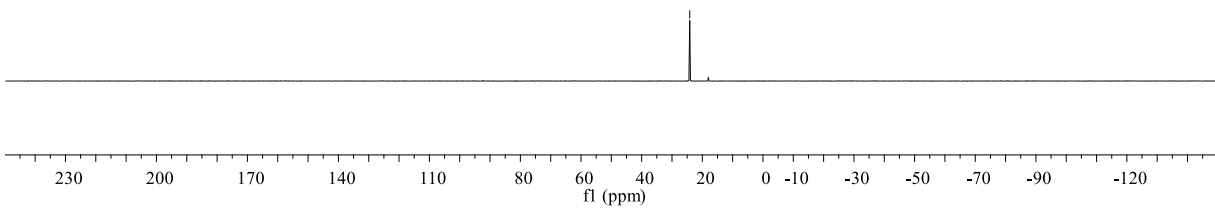

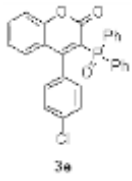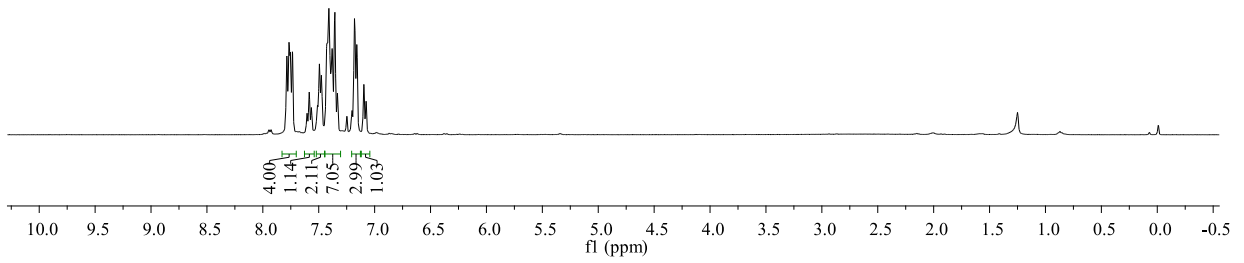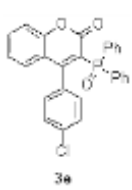

- 164.62
- 164.57
- 159.27
- 154.27
- 131.69
- 131.57
- 131.47
- 129.63
- 128.45
- 128.28
- 128.15
- 124.49
- 120.55
- 120.45
- 116.83
- 77.32
- 77.00
- 76.68

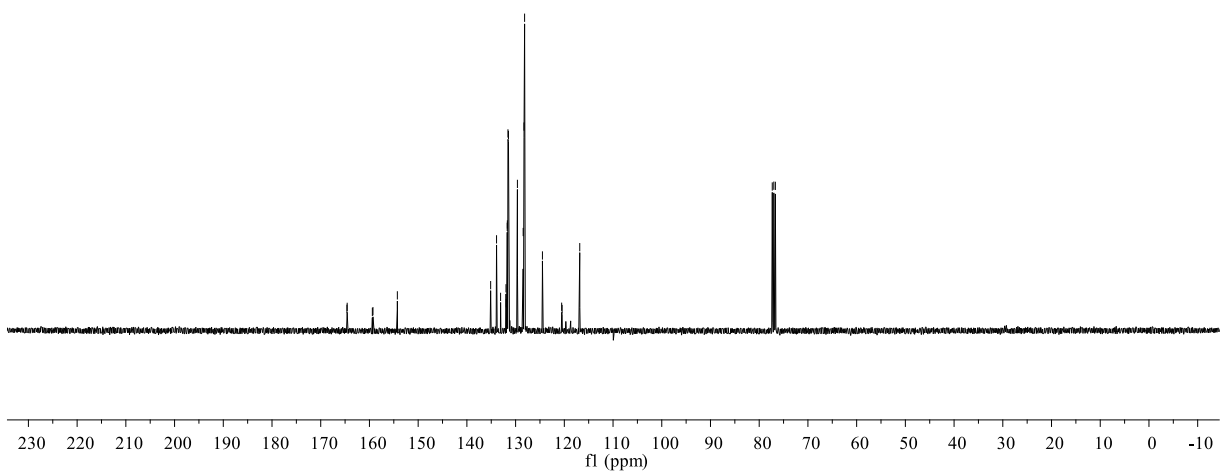

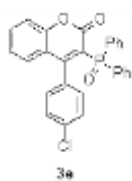

- 24.75

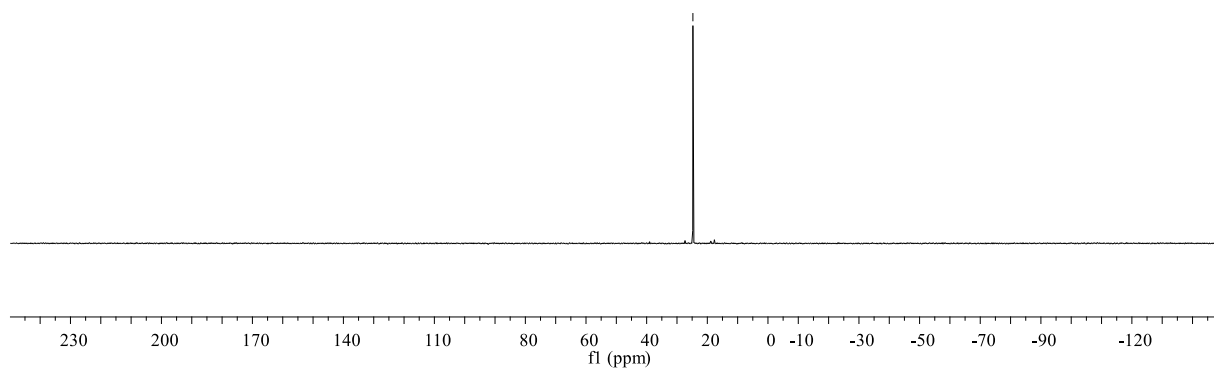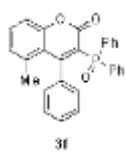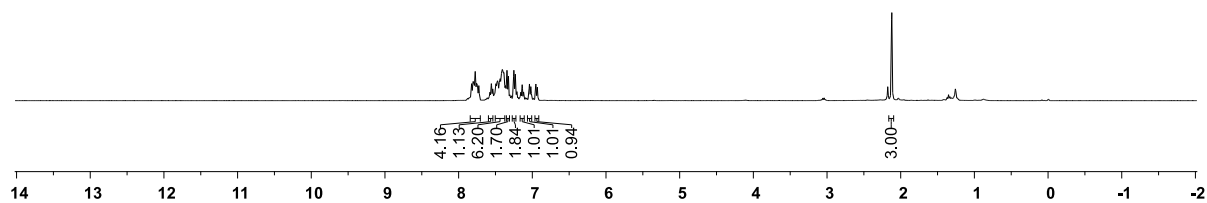

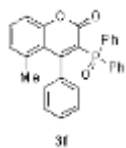

- 166.15
- 166.10
- 159.48
- 154.07
- 133.69
- 131.50
- 128.85
- 127.91
- 124.52
- 120.18
- 120.09
- 119.10
- 118.09
- 116.62
- 77.32
- 77.00
- 76.68
- 19.98

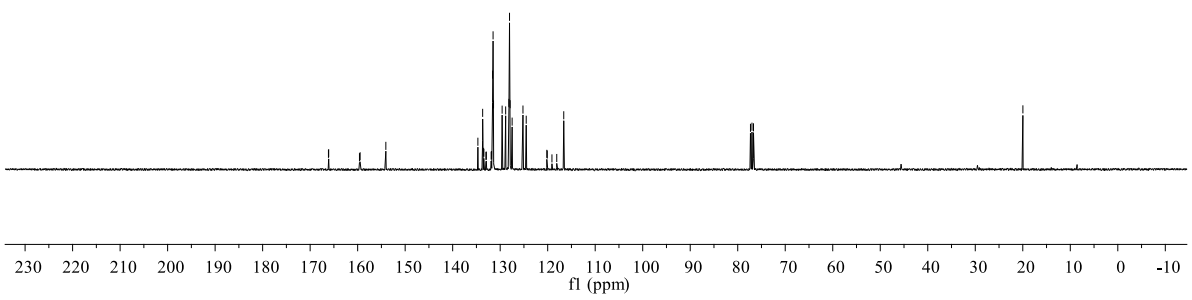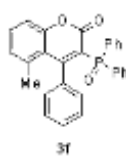

24.46

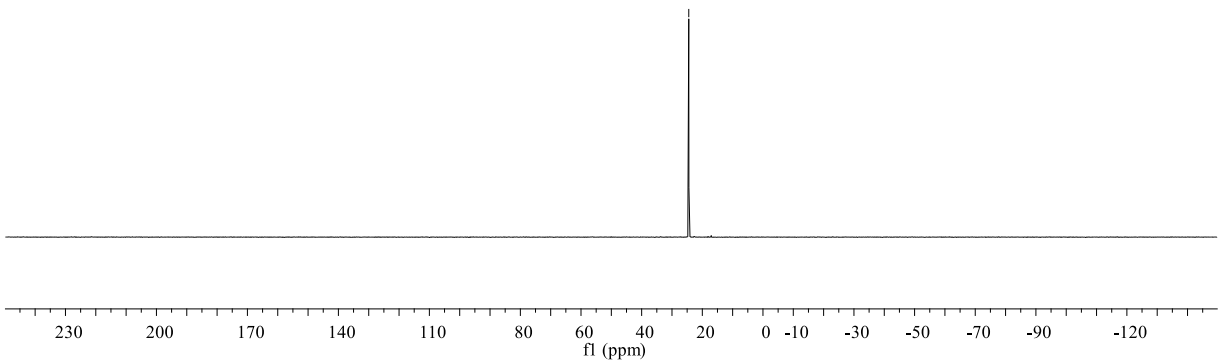

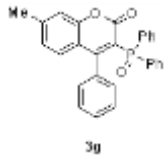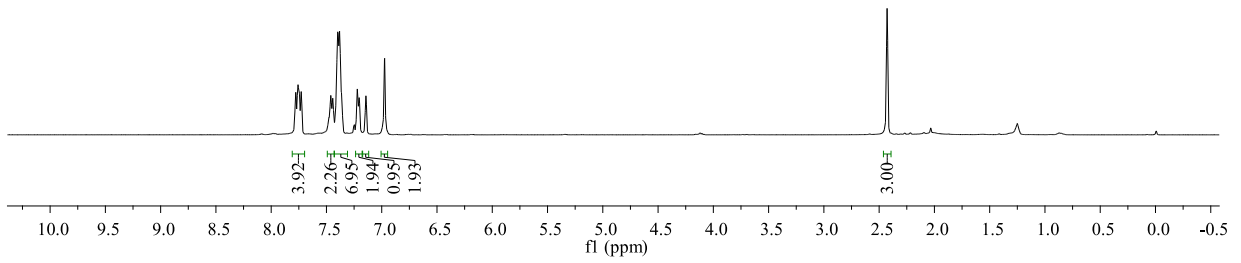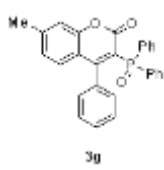

$^{13}\text{C NMR}$  chemical shifts (ppm): 165.89, 165.84, 159.71, 154.35, 145.48, 131.51, 128.81, 128.10, 125.58, 118.48, 118.39, 116.73, 77.32, 77.00, 76.68, and 21.72.

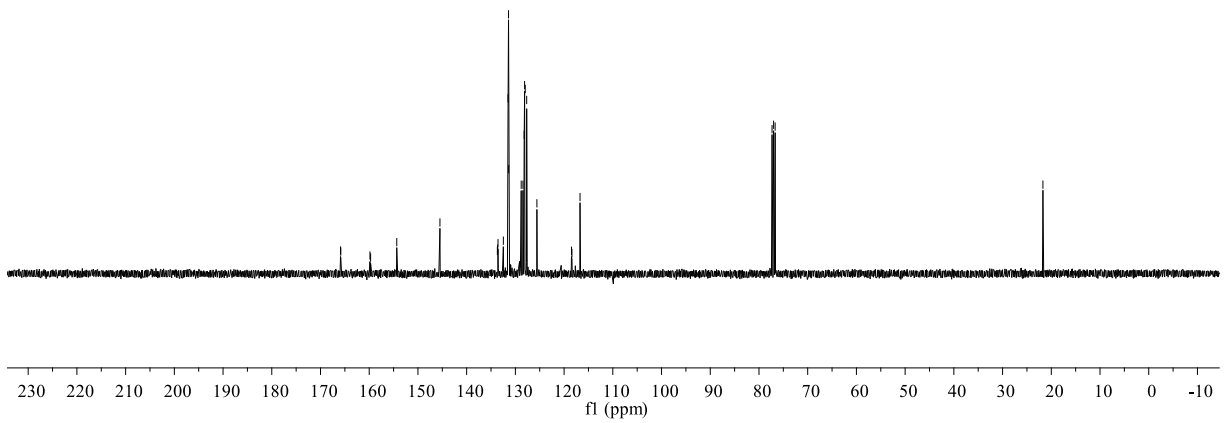

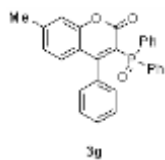

— 24.42

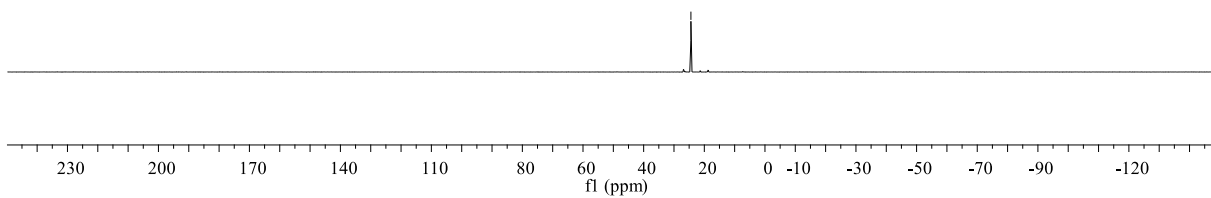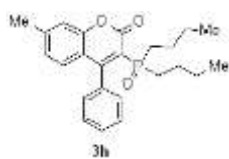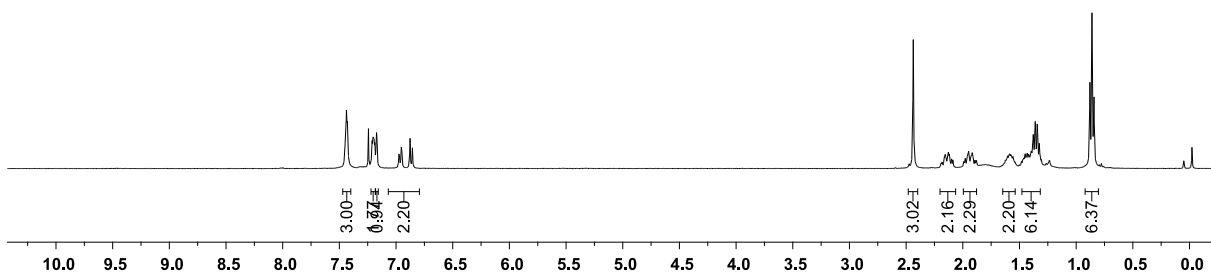

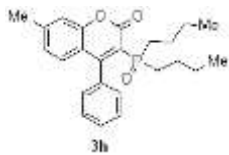

- 166.1
- 166.0
- 160.3
- 153.9
- 145.2
- 133.9
- 133.9
- 125.7
- 118.9
- 118.8
- 116.7
- 116.6
- 115.8
- 77.3
- 77.0
- 76.7
- 29.8
- 29.1
- 23.7
- 13.6
- 13.6

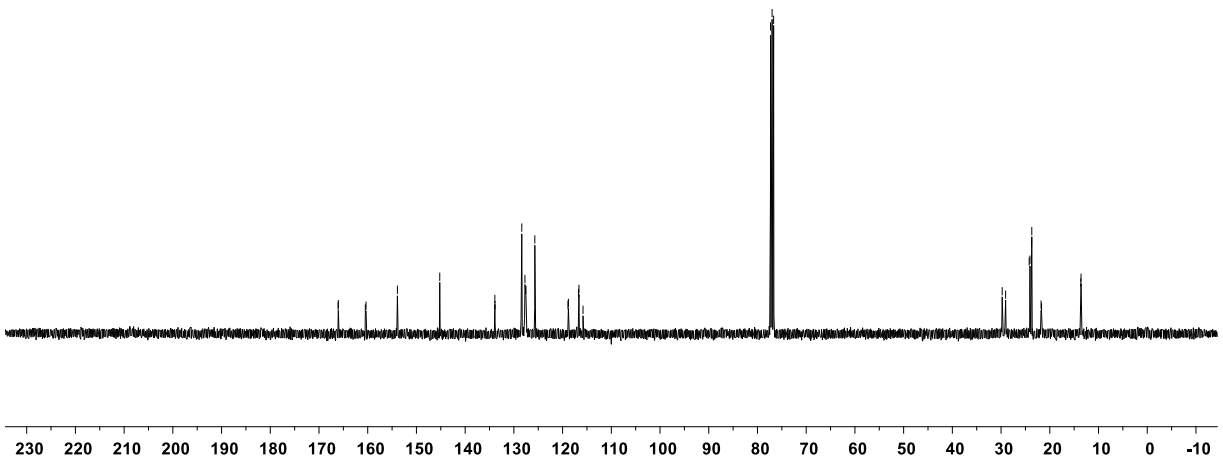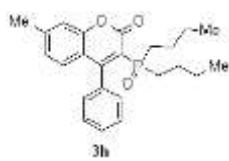

43.8

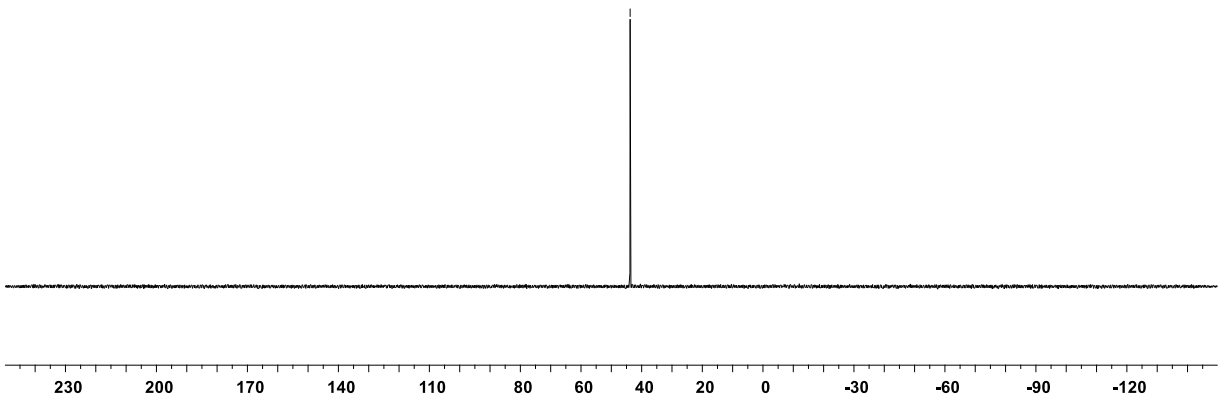



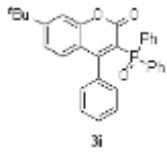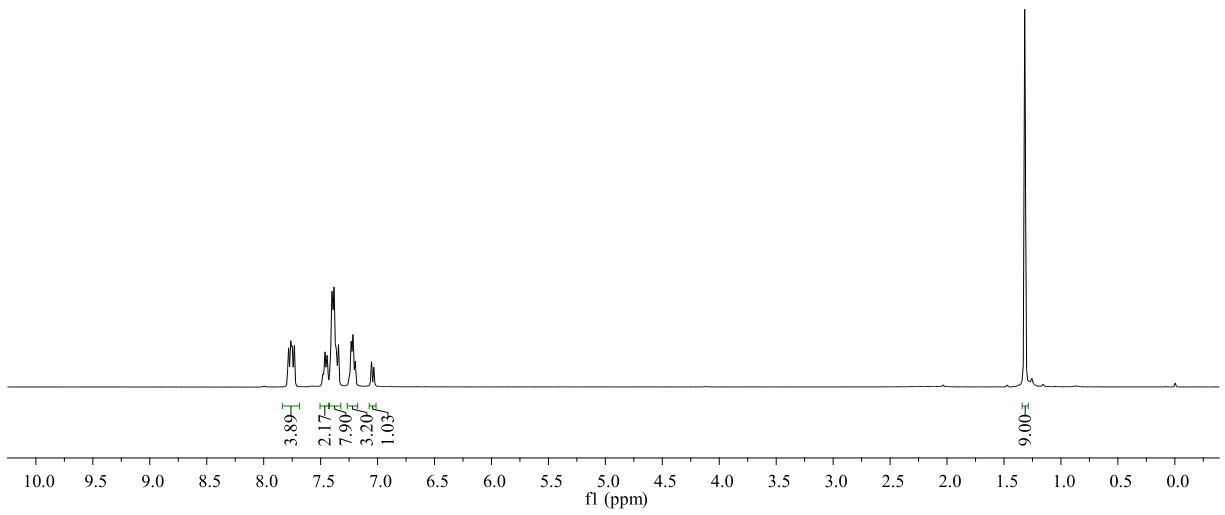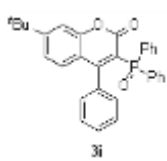

- 165.78
- 165.73
- 159.94
- 159.81
- 158.61
- 154.34
- 133.55
- 131.41
- 128.19
- 127.68
- 121.95
- 118.40
- 118.31
- 117.90
- 116.88
- 113.42
- 77.32
- 77.00
- 76.68
- 35.31
- 30.81

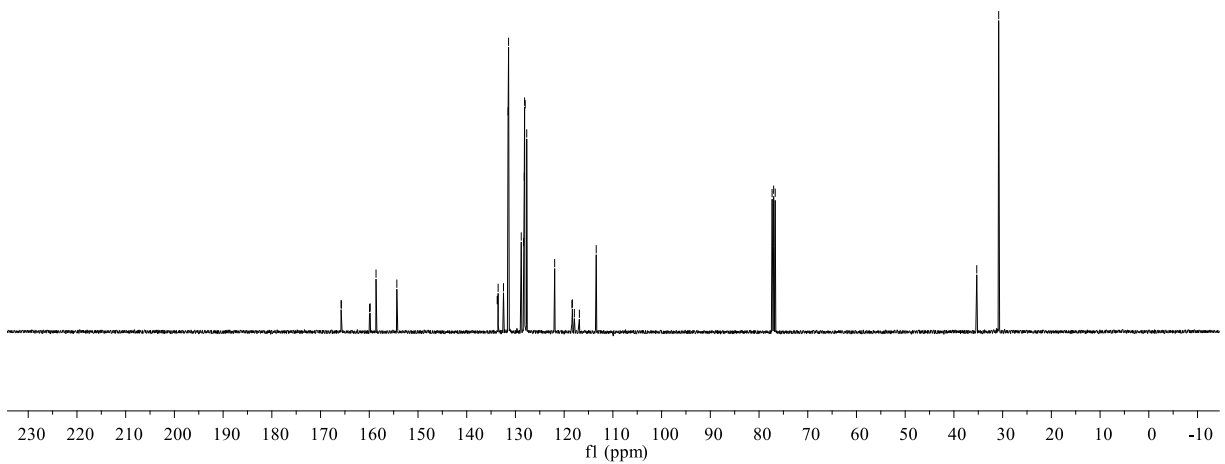

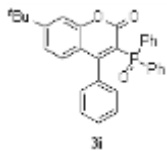

- 24.59

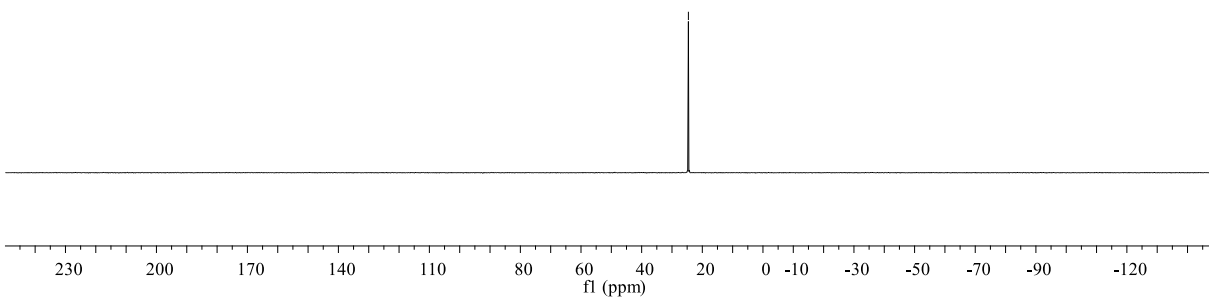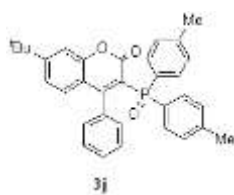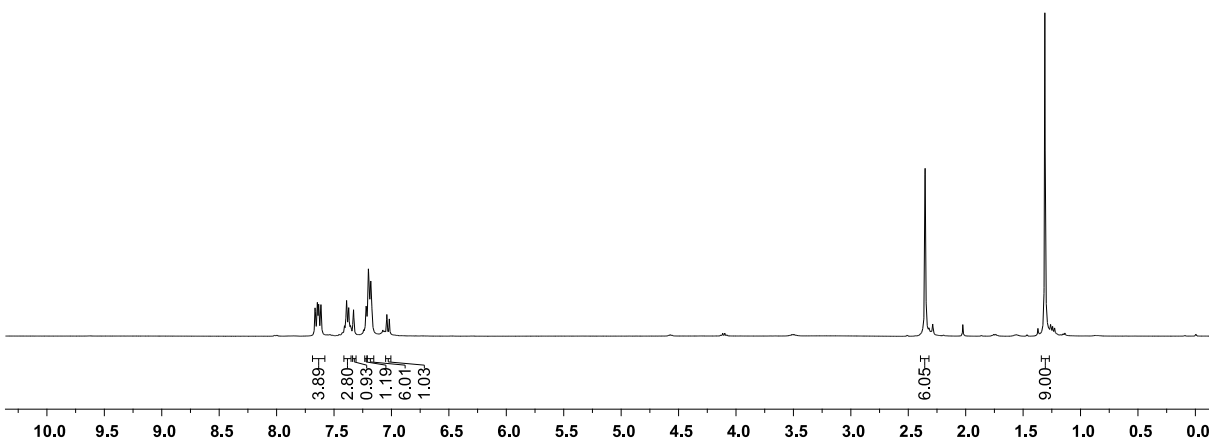

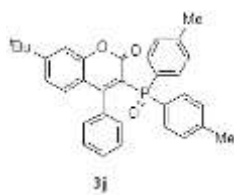

- ∟ 165.3
- 165.2
- 158.3
- 154.2
- ∟ 141.7
- ∟ 141.7
- ∟ 129.2
- 127.5
- ∟ 121.8
- ∟ 118.4
- ∟ 118.3
- ∟ 118.2
- ∟ 117.2
- ∟ 113.4
- ∟ 113.2
- ∟ 77.3
- ∟ 77.0
- ∟ 76.7
- 35.2
- 30.7
- ∟ 21.6
- ∟ 21.5
- ∟ 21.4
- ∟ 21.3

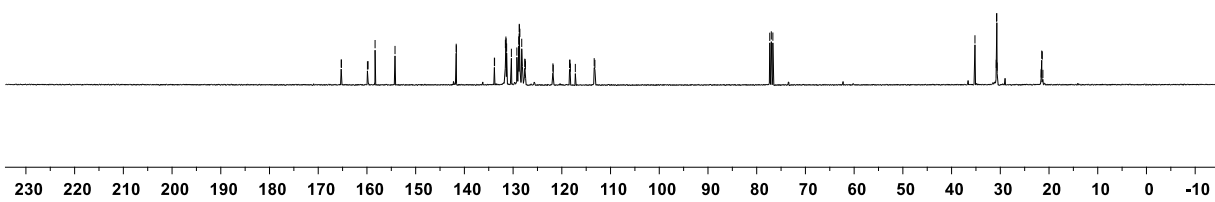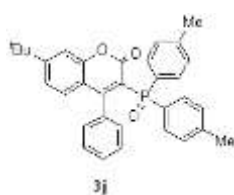

— 25.1

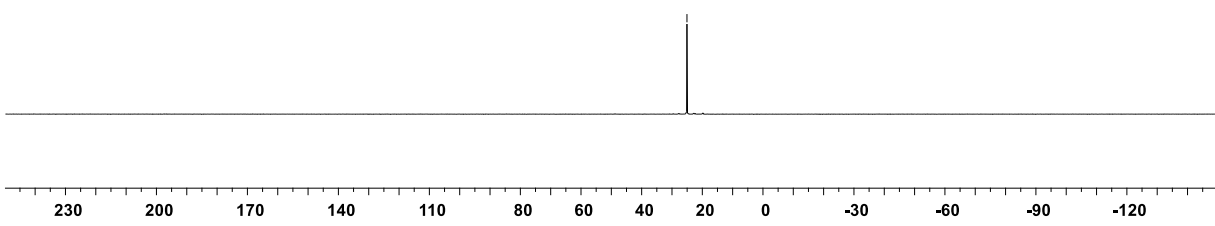

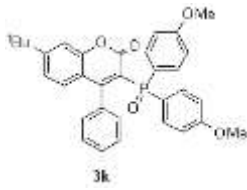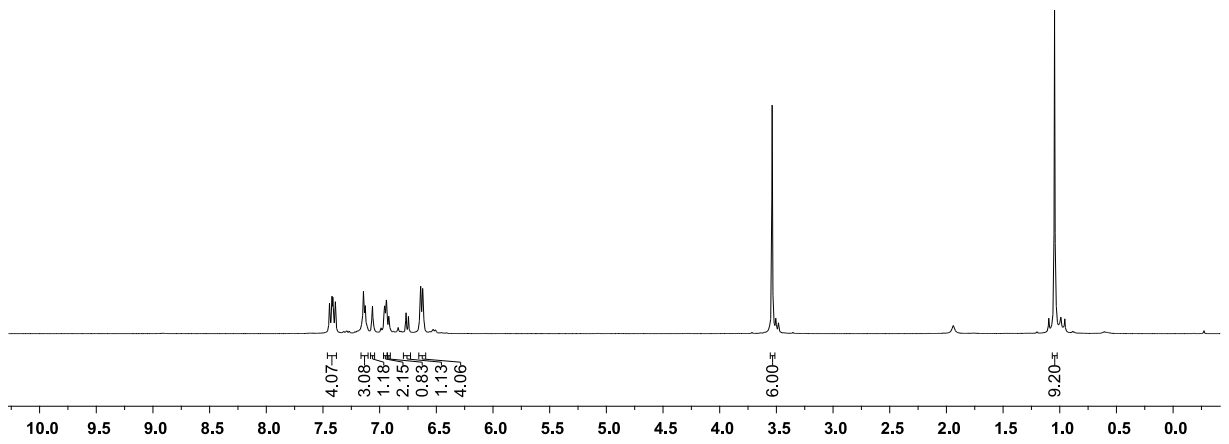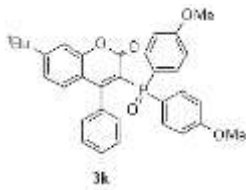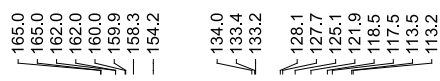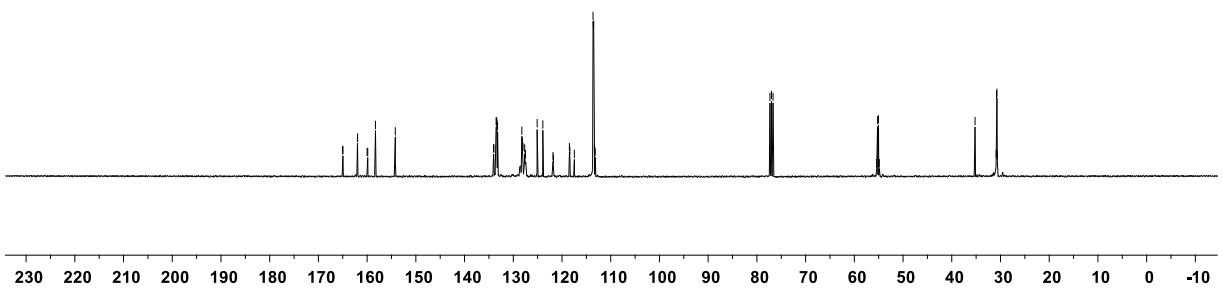

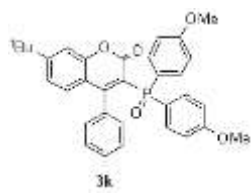

-24.3

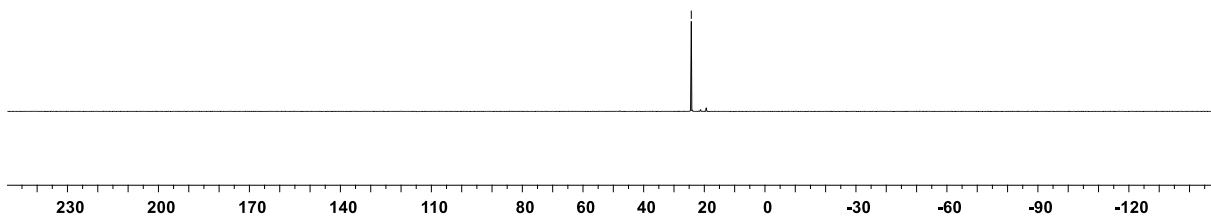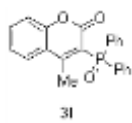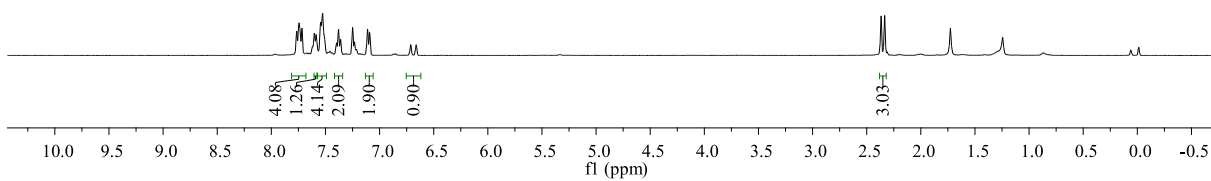

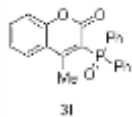

163.32  
163.07  
152.35  
151.50  
150.15  
132.05  
129.76  
128.93  
126.07  
121.39

77.32  
77.00  
76.68

15.81  
15.73

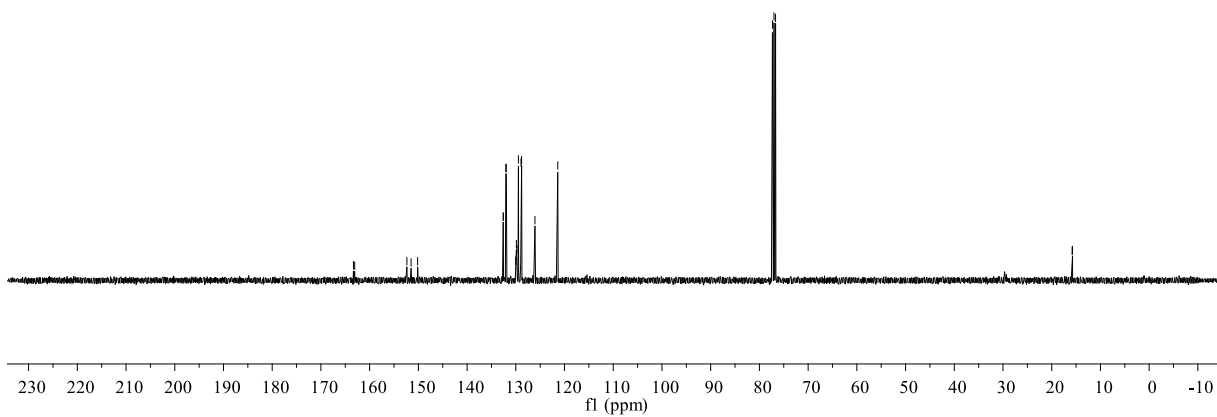

31.35

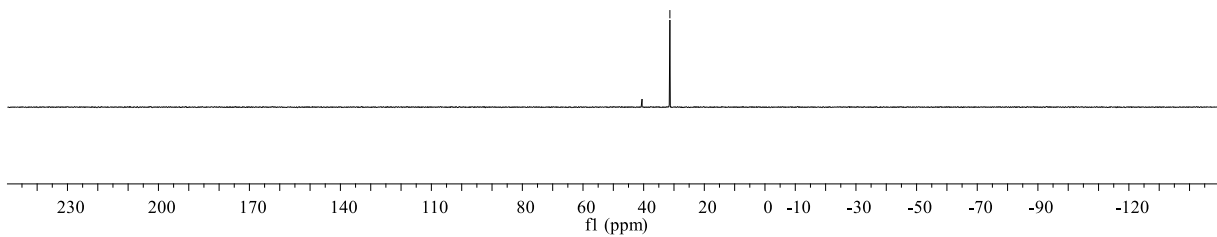

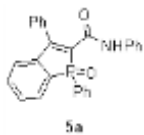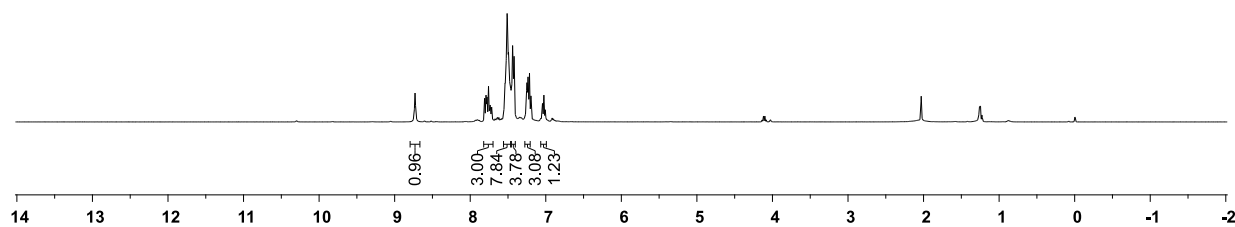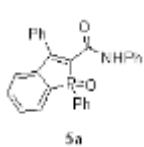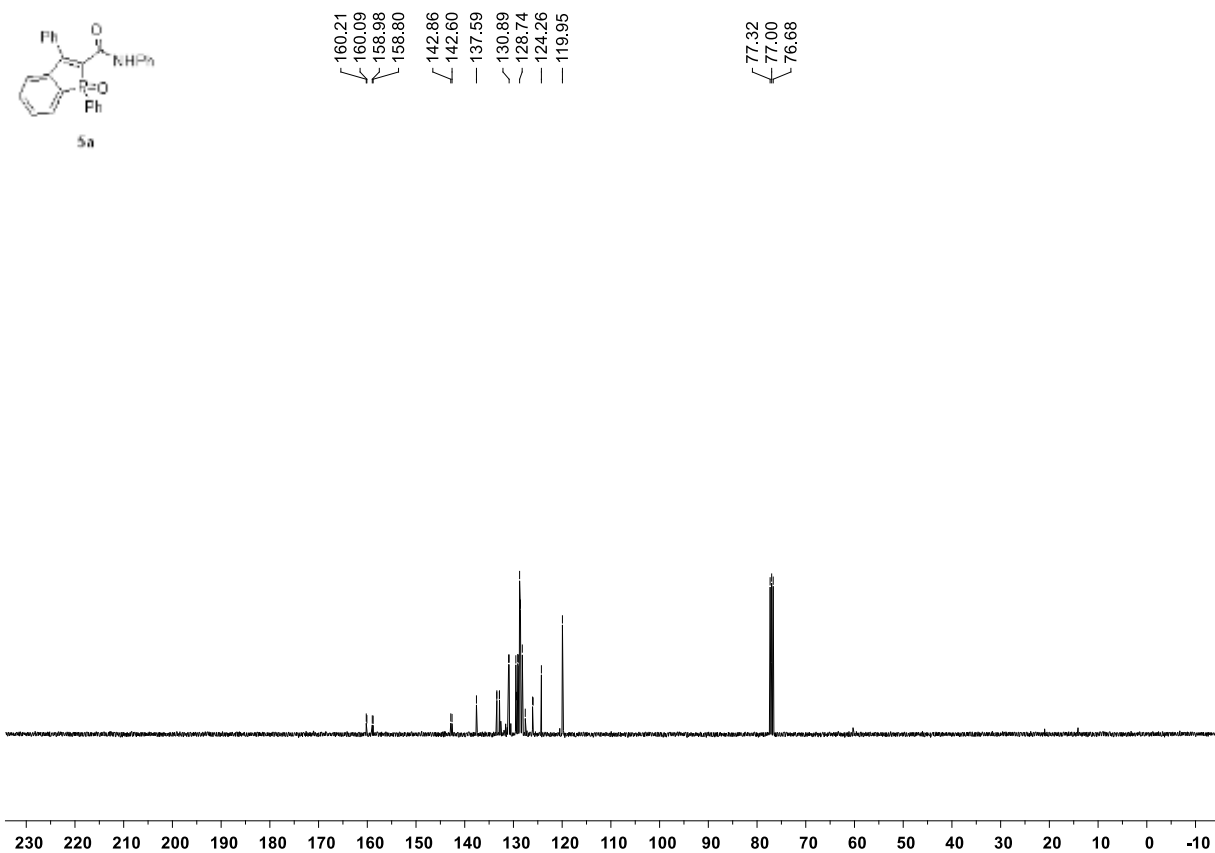

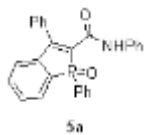

-- 39.85

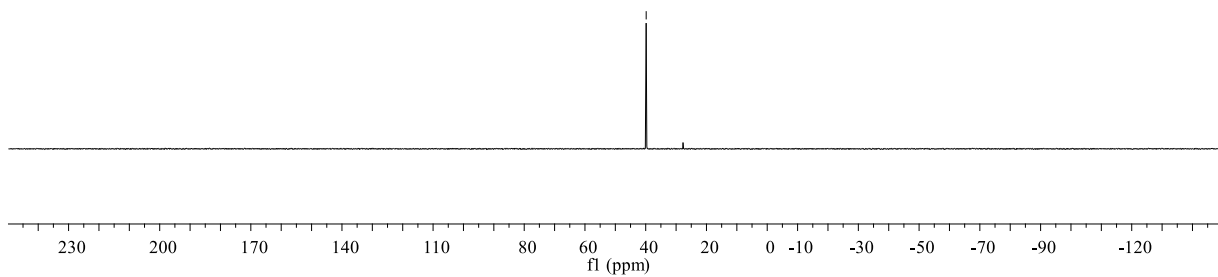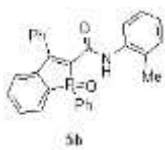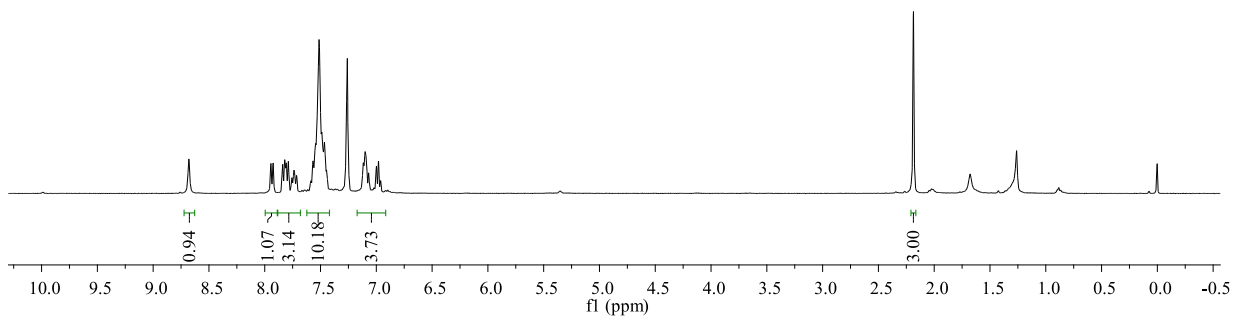



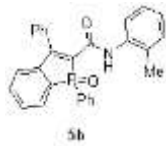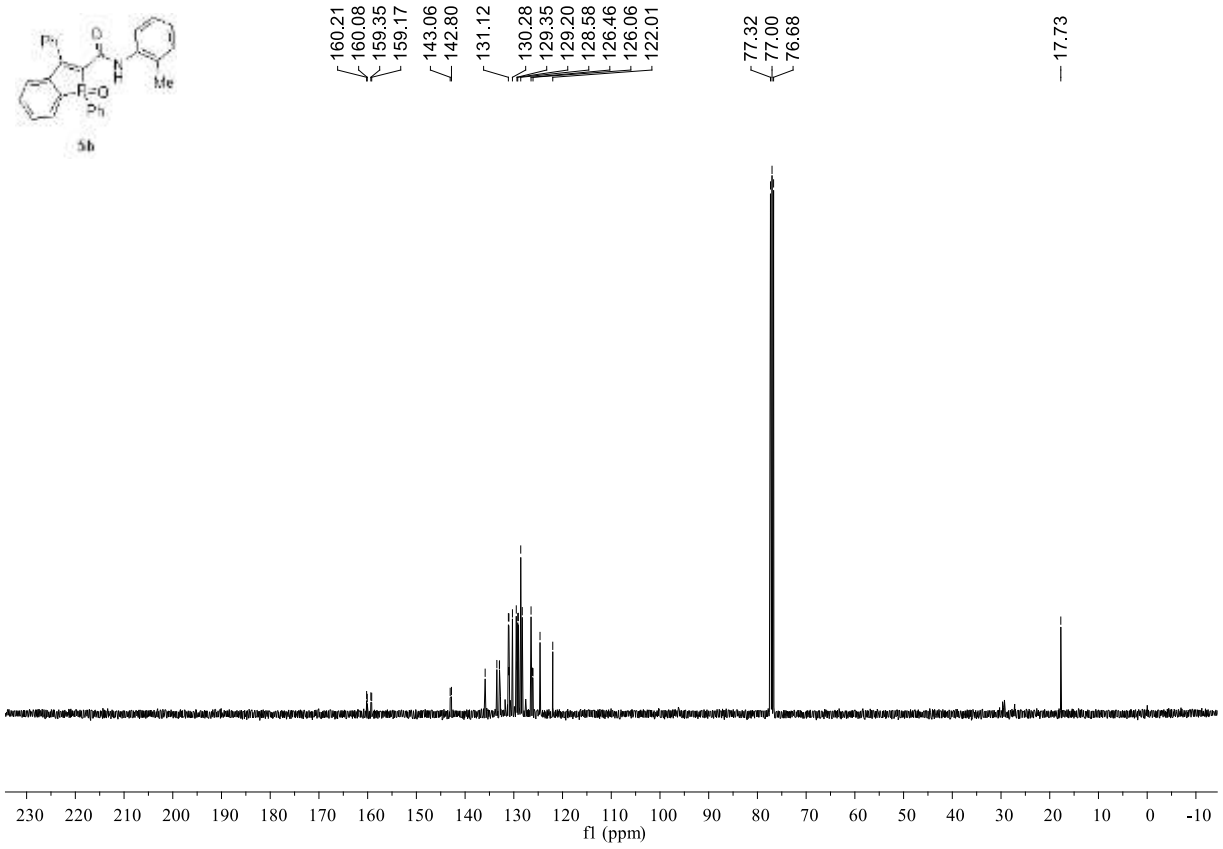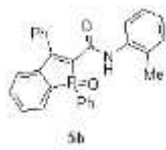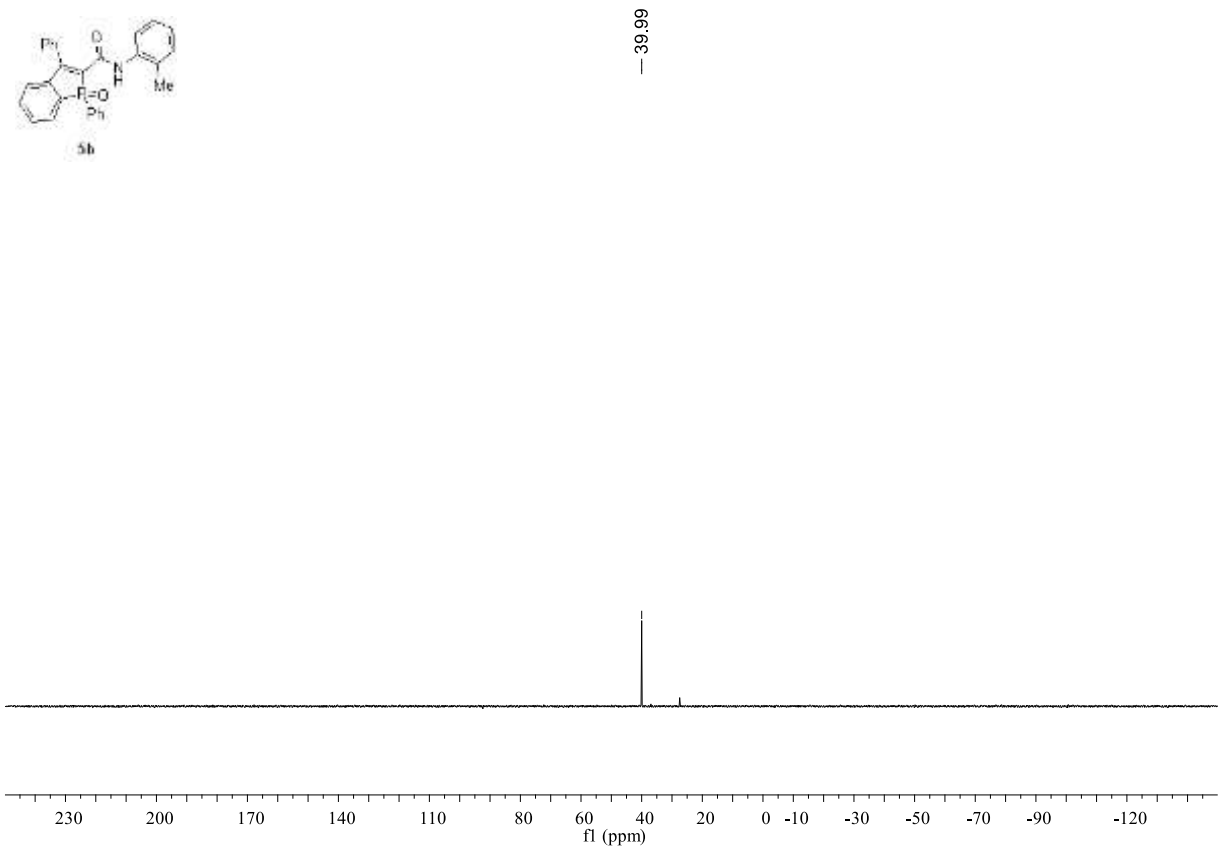

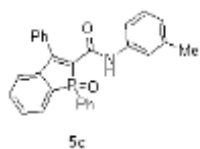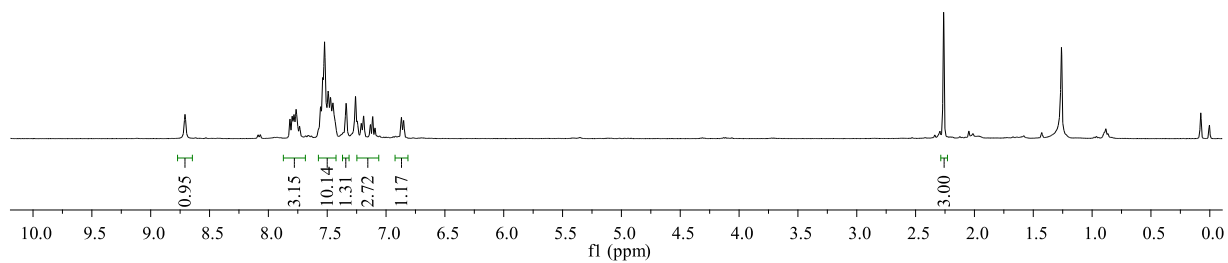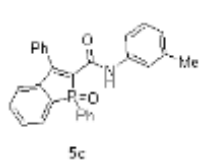

160.18  
 160.04  
 159.06  
 158.87  
 132.94  
 132.69  
 129.51  
 129.18  
 128.21  
 125.13  
 120.60  
 117.04  
 77.32  
 77.00  
 76.68  
 21.35

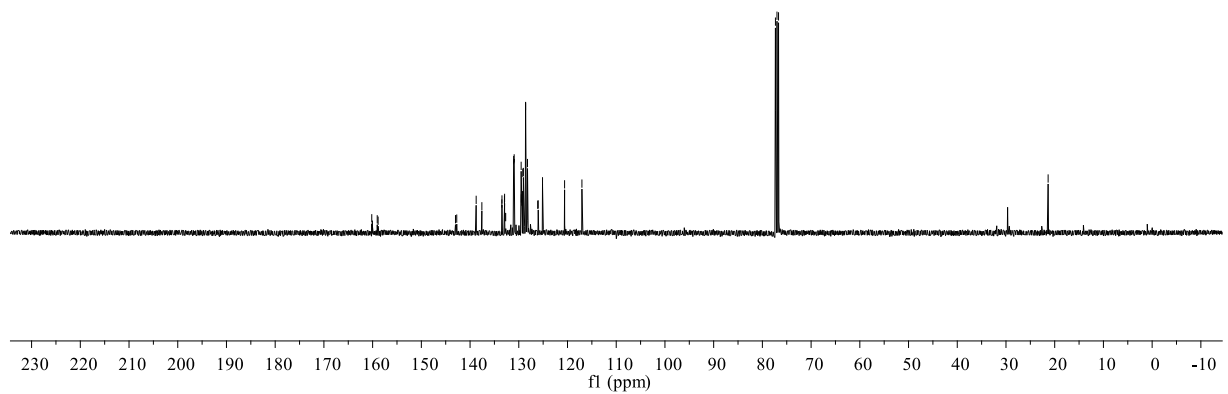

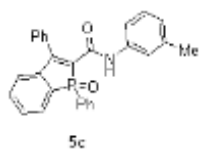

— 39.93

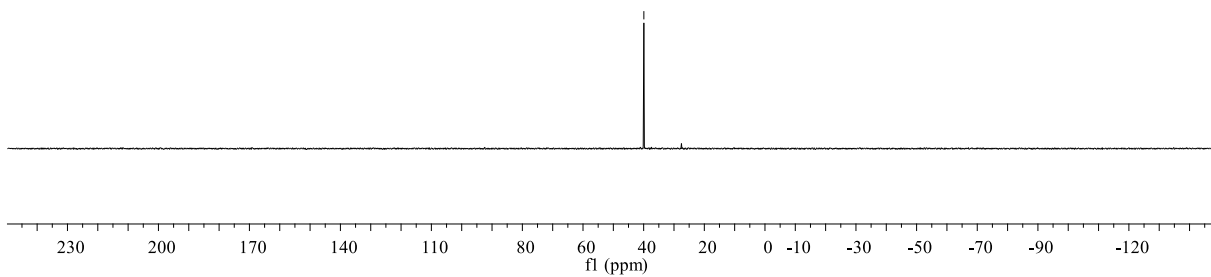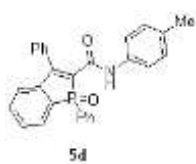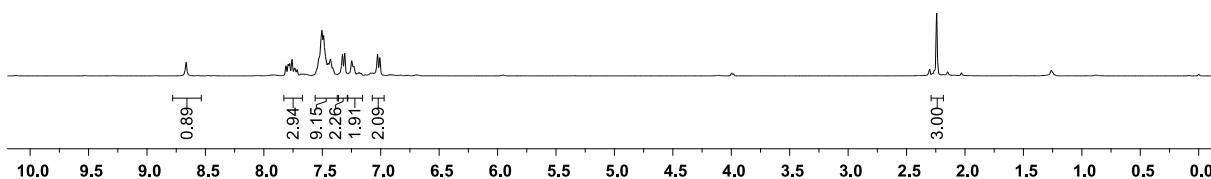

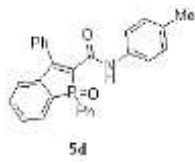

160.06  
 159.93  
 158.69  
 158.51  
 142.86  
 142.60  
 132.81  
 129.19  
 125.88  
 119.89

77.32  
 77.00  
 76.68

20.75

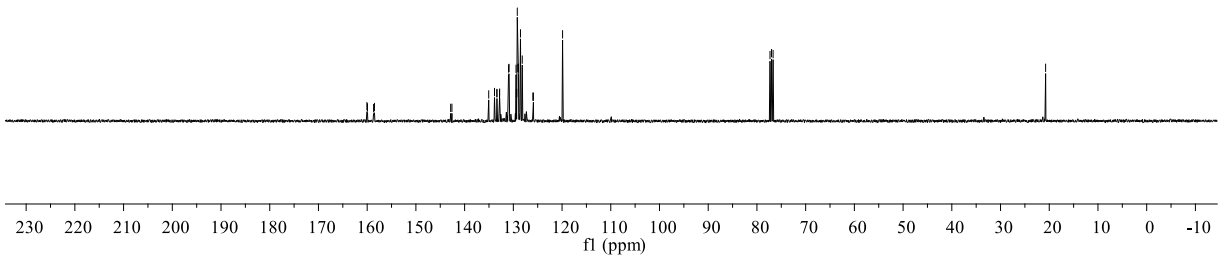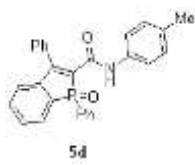

39.83

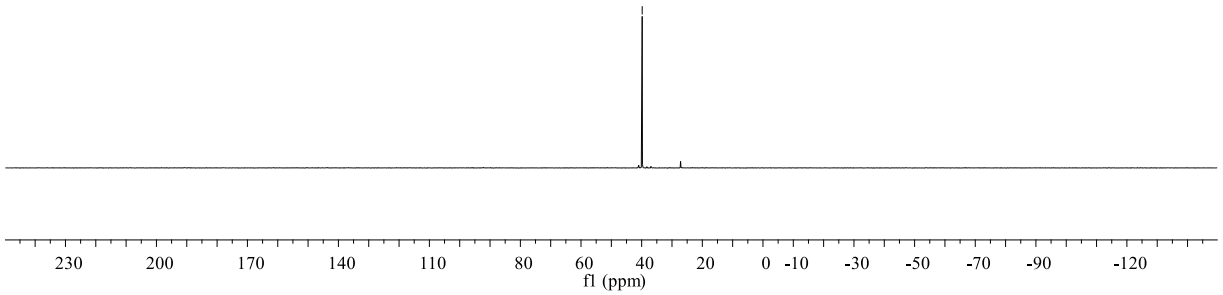

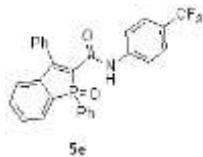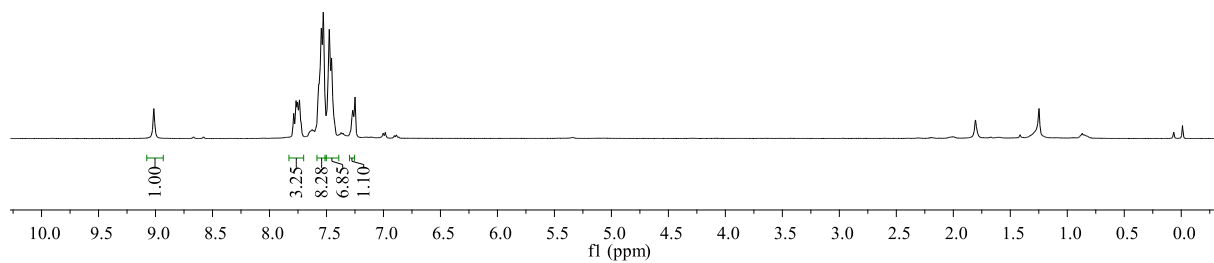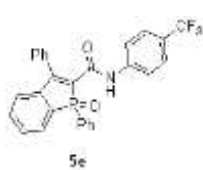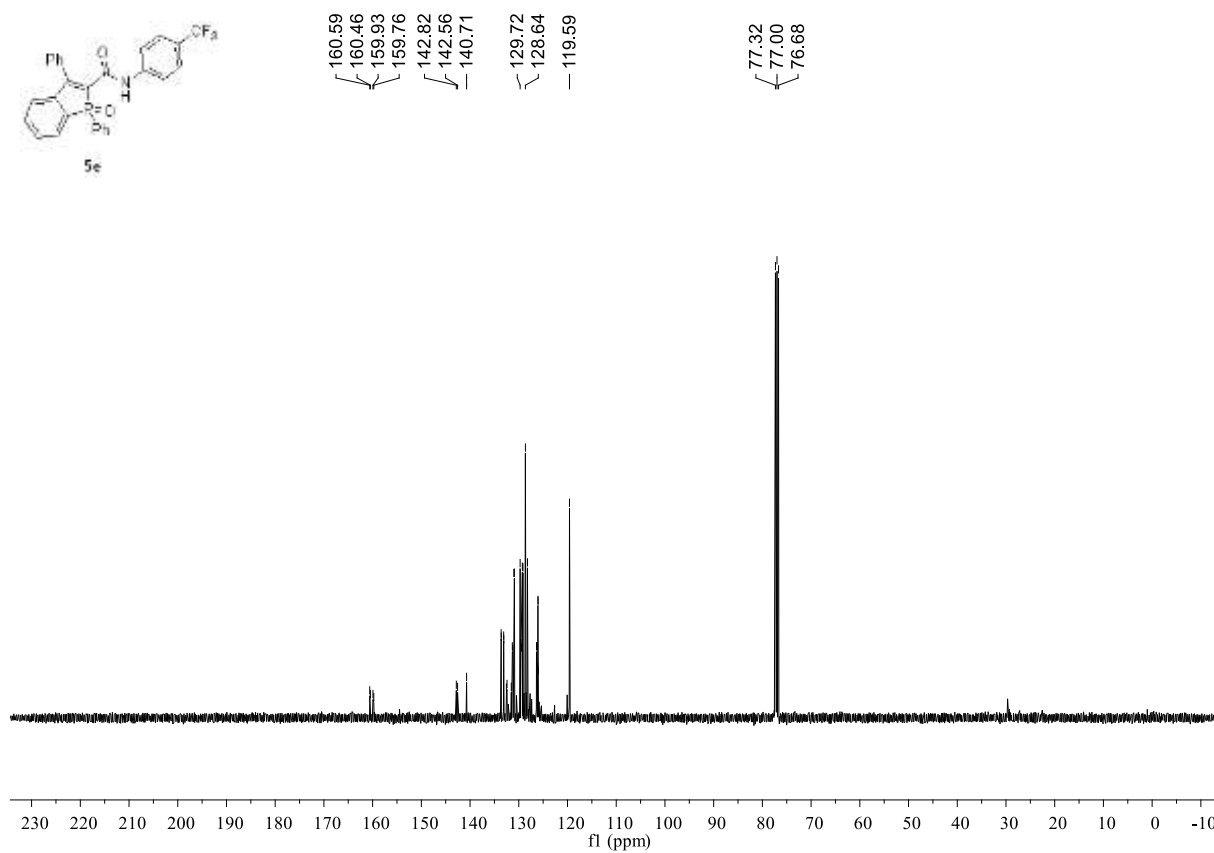

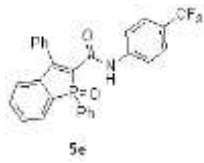

-- 39.99

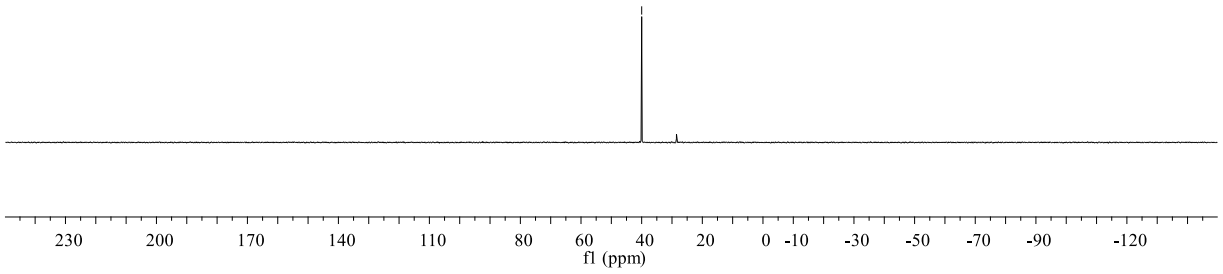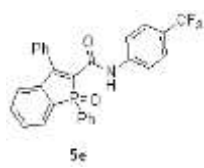

-- -62.15

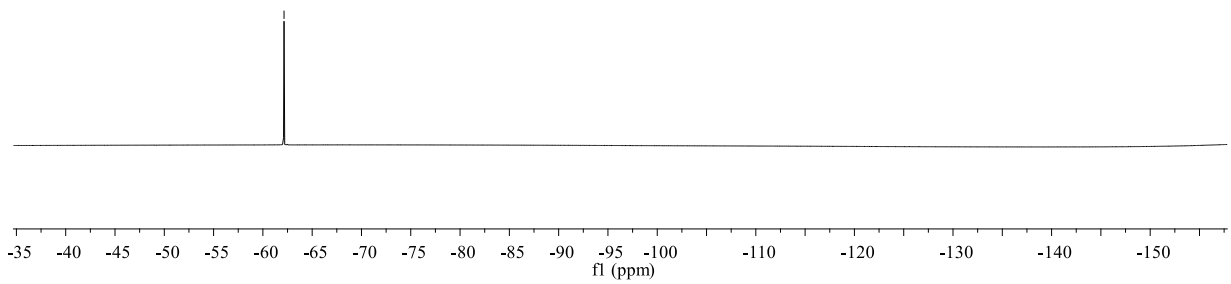

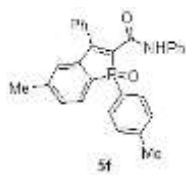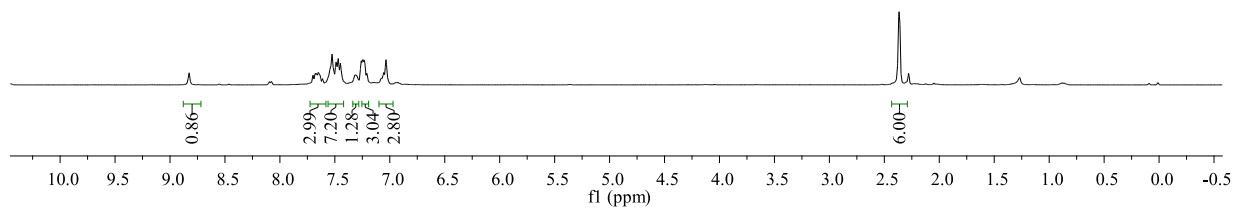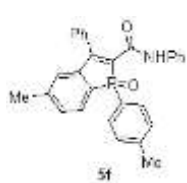

- Chemical shift values (ppm) for the <sup>13</sup>C NMR spectrum:
- 160.40
  - 160.27
  - 158.83
  - 158.65
  - 143.56
  - 142.98
  - 137.71
  - 129.35
  - 128.72
  - 128.52
  - 128.19
  - 126.88
  - 126.77
  - 124.18
  - 119.98
  - 77.32
  - 77.00
  - 76.68
  - 21.87
  - 21.64

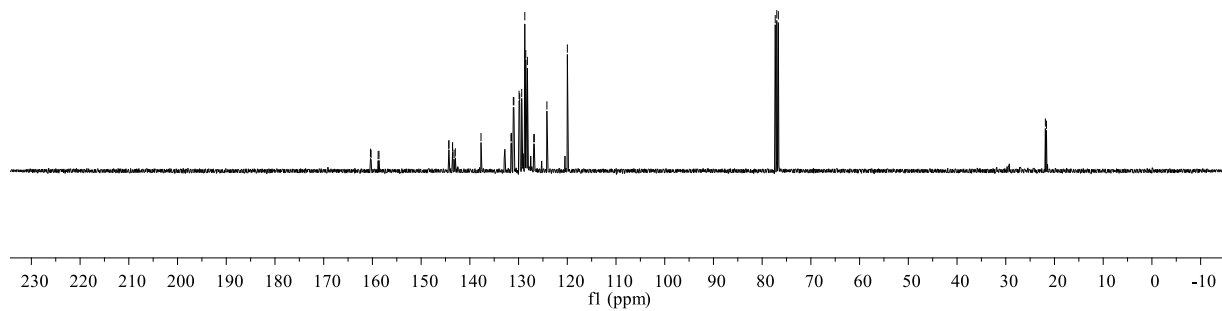

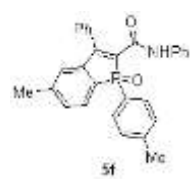

— 39.98

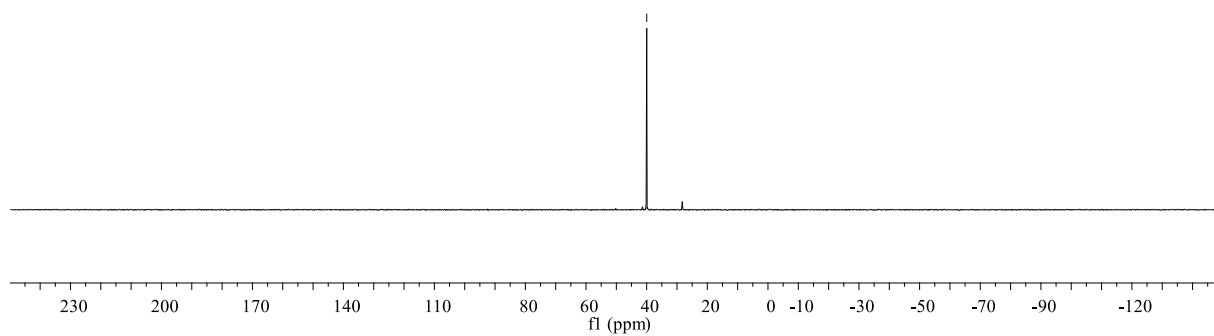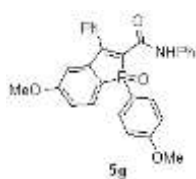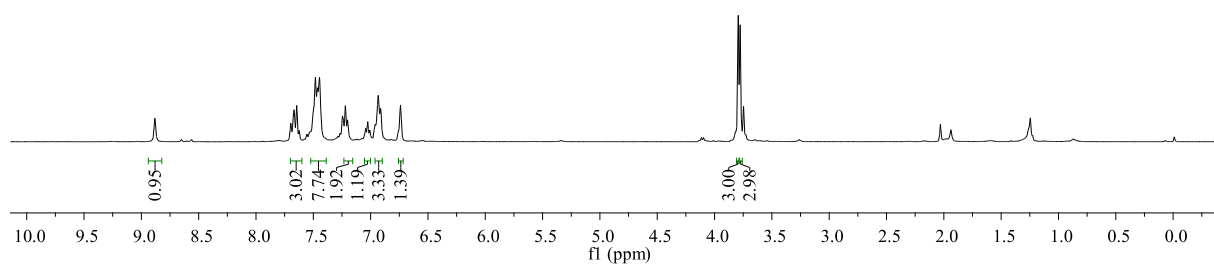



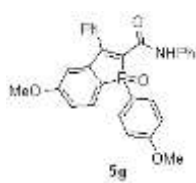

- 163.99
- 163.97
- 163.27
- 163.24
- 160.38
- 160.26
- 157.69
- 157.52
- 145.49
- 145.21
- 137.72
- 132.76
- 130.85
- 128.47
- 119.97
- 114.63
- 114.09
- 113.96
- 113.42
- 113.30
- 77.32
- 77.00
- 76.68
- 55.59
- 55.32

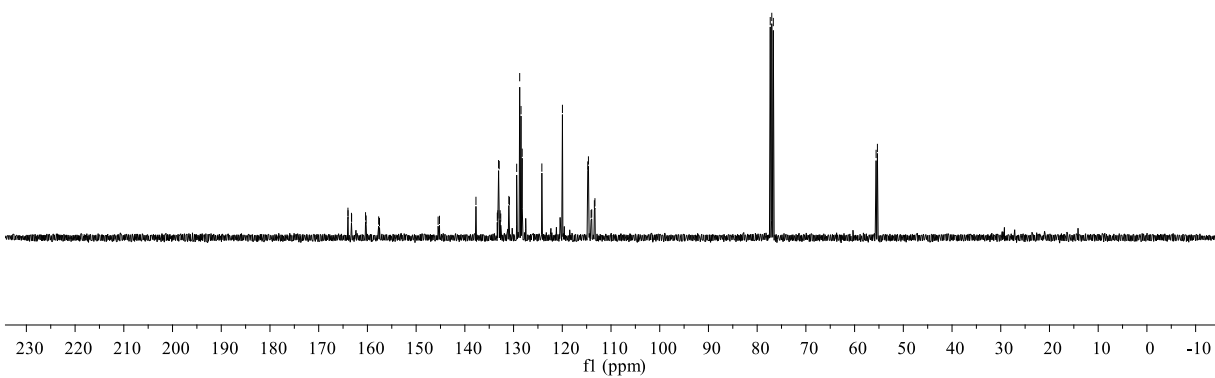

38.89

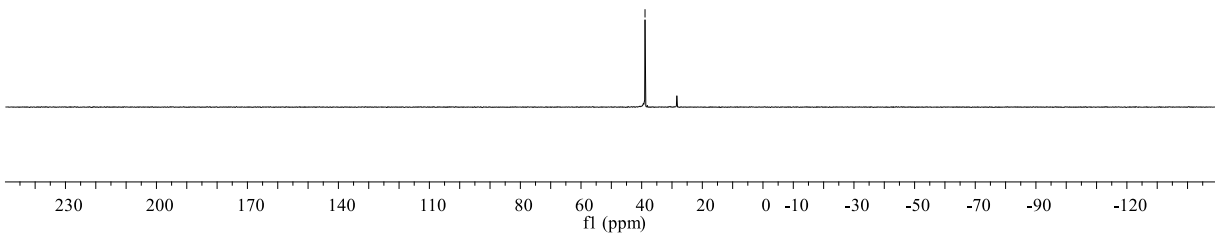

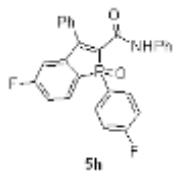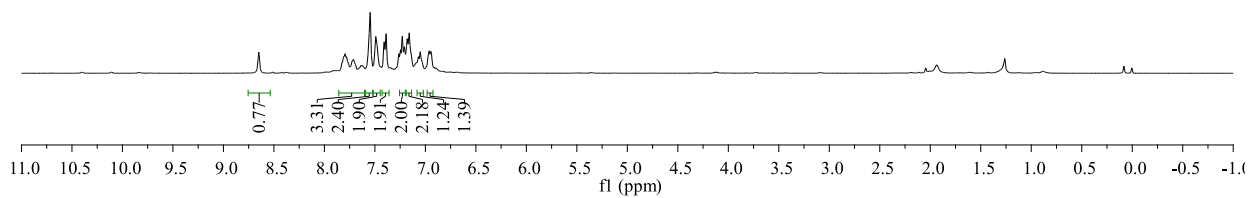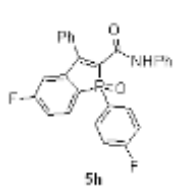

167.56  
167.11  
165.02  
164.58  
159.74  
146.88  
145.69  
137.37  
131.40  
124.56

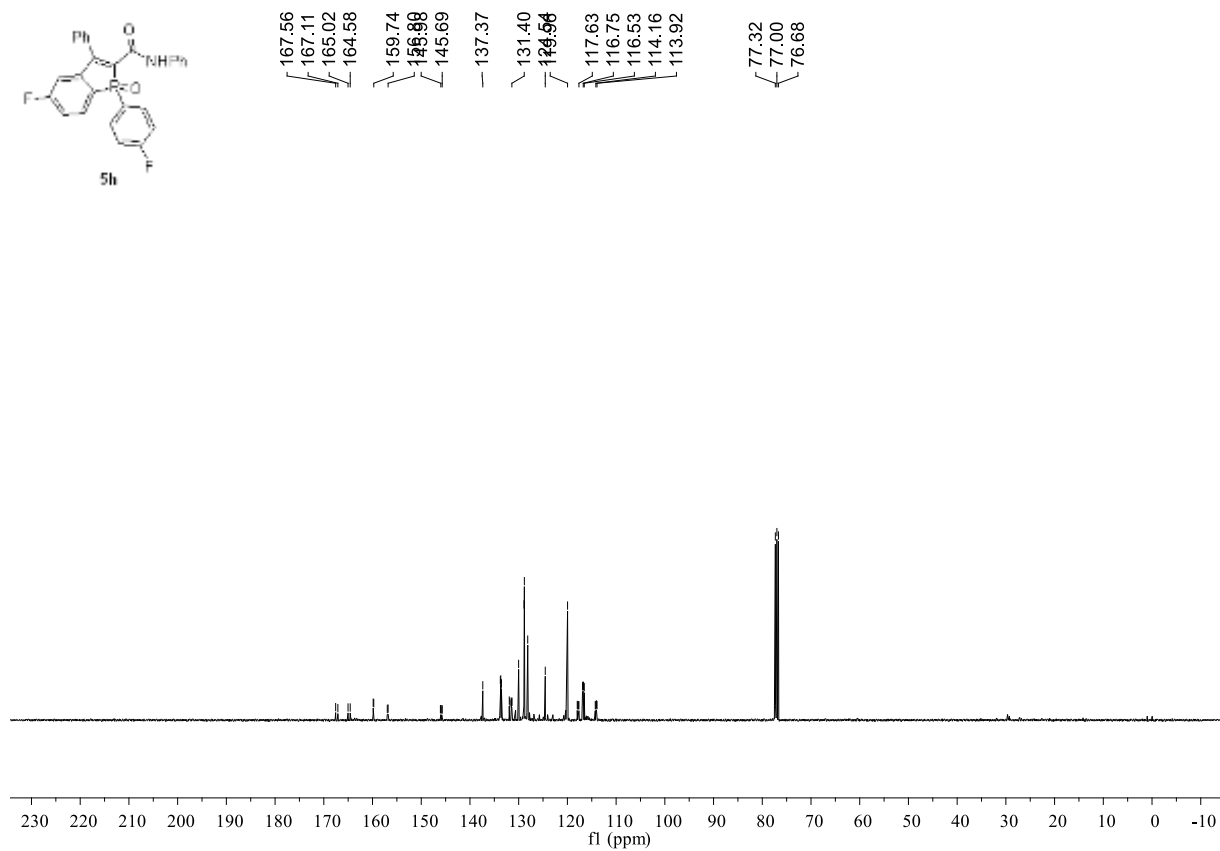

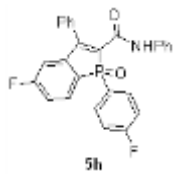

— 37.13

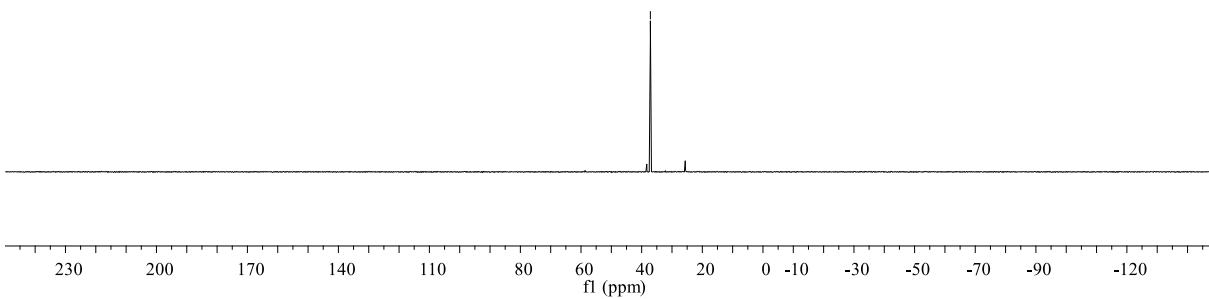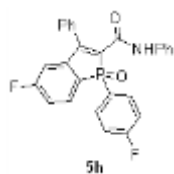

-103.00  
-104.41

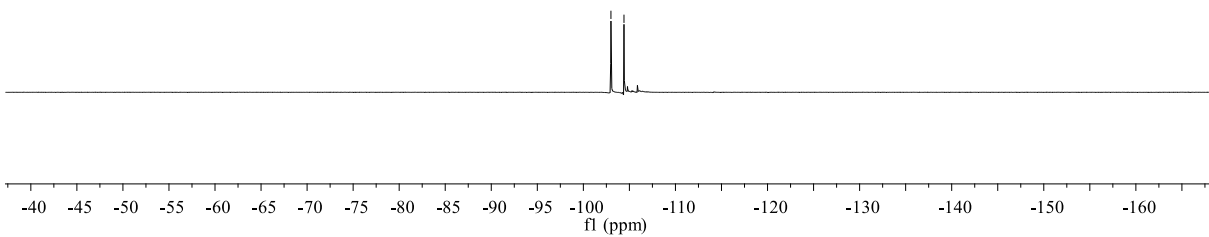

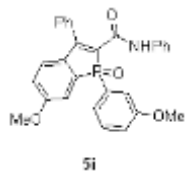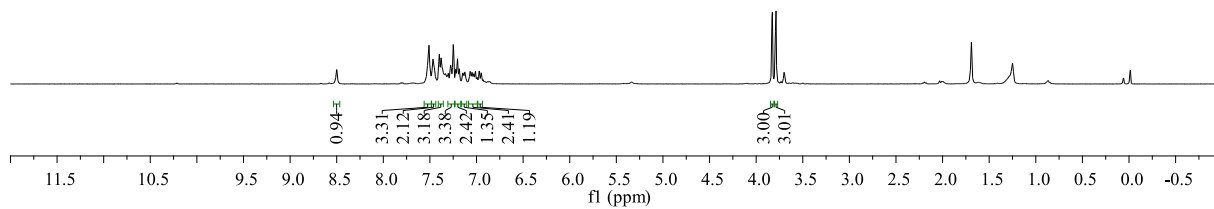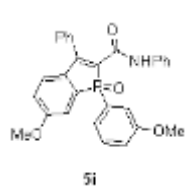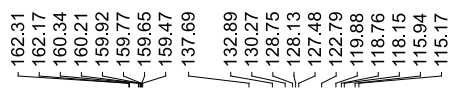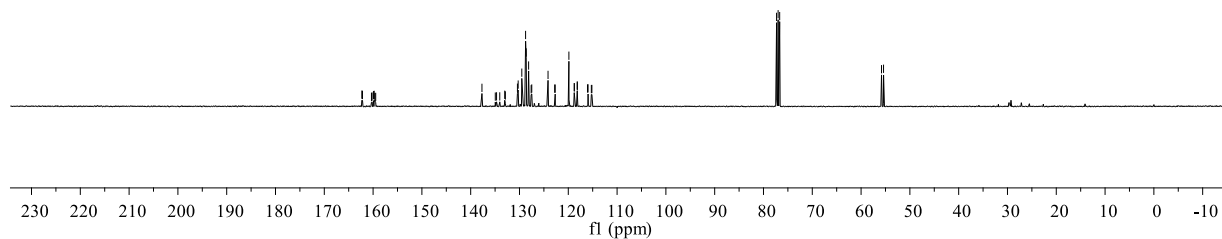

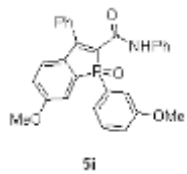

- 39.07

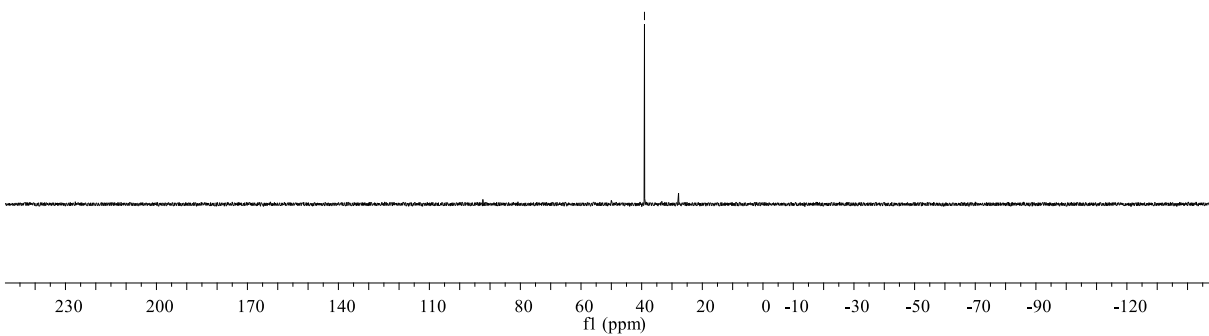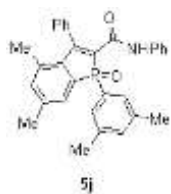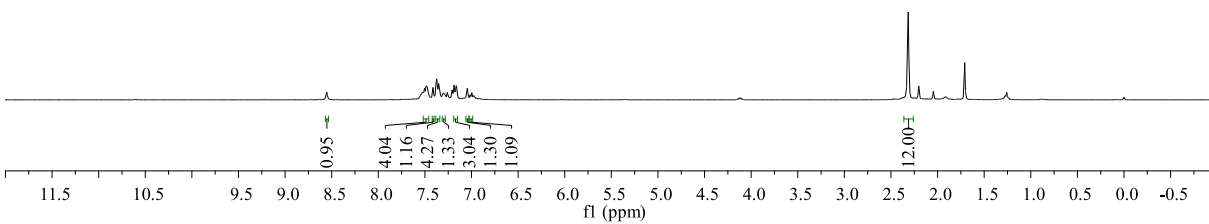

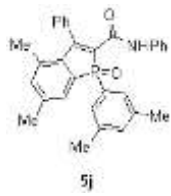

161.54  
161.36  
160.44  
160.32  
138.72  
137.75  
136.82  
134.67  
128.66  
128.22  
128.12  
127.87  
126.33  
124.03  
119.93

77.32  
77.00  
76.68

21.31  
21.14  
21.07  
20.98

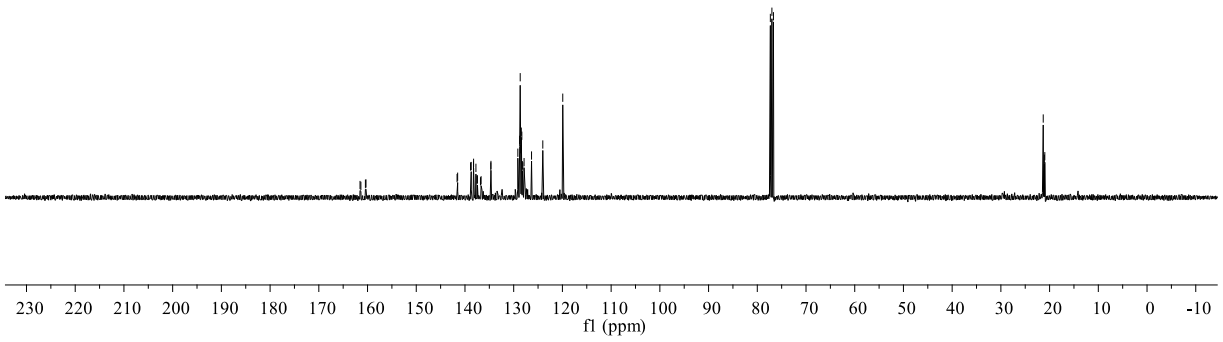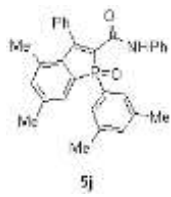

36.03

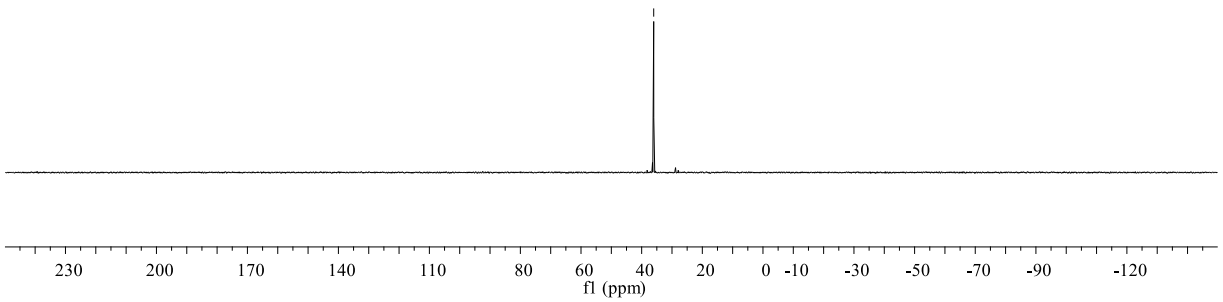

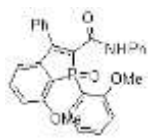

5k

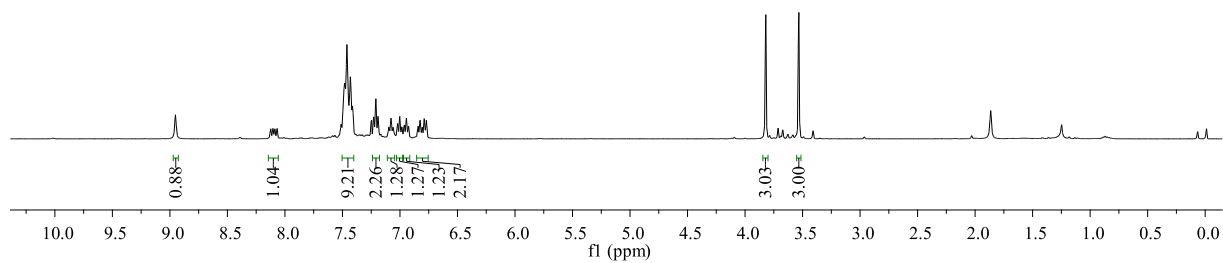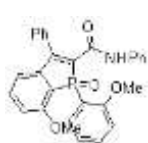

5k

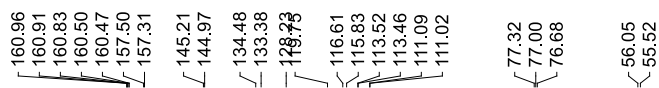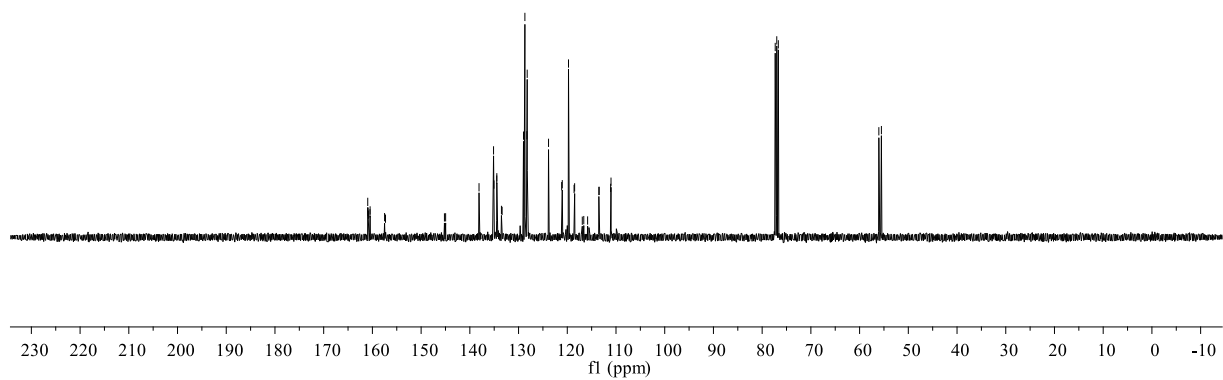

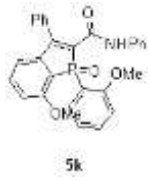

— 42.22

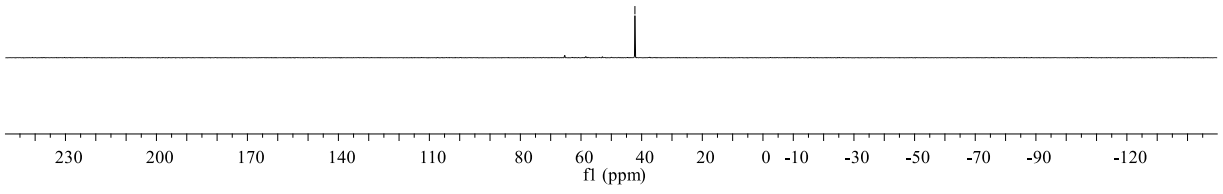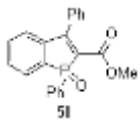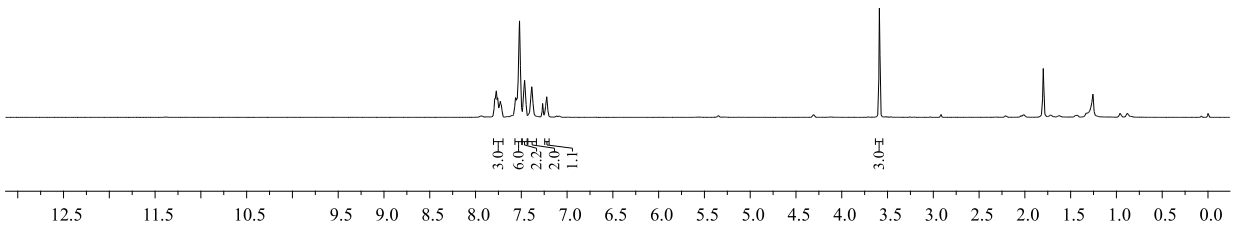



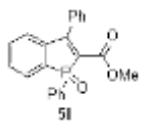

164.6  
164.4  
163.0  
162.9  
142.2  
142.0  
133.1  
131.0  
129.6  
129.4  
128.7  
127.9  
126.5  
125.5  
77.2  
77.0  
76.8  
52.0

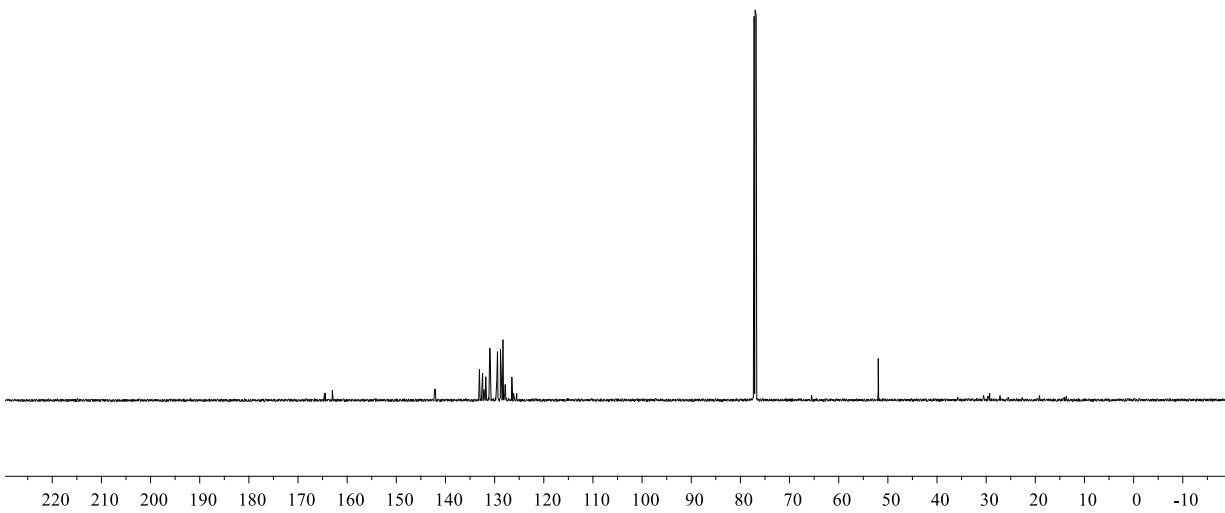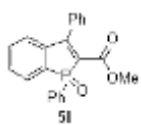

35.8

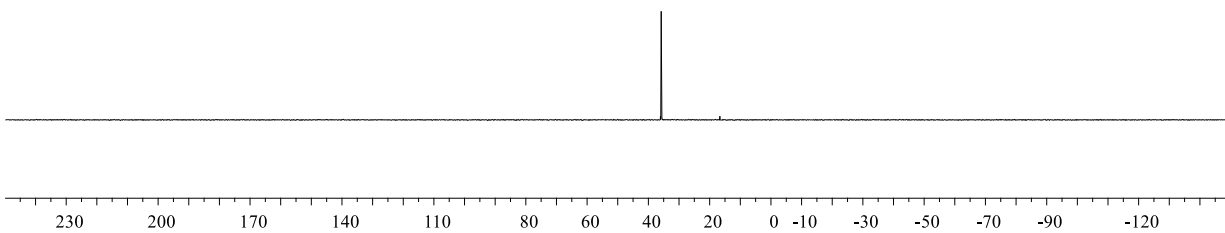

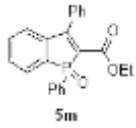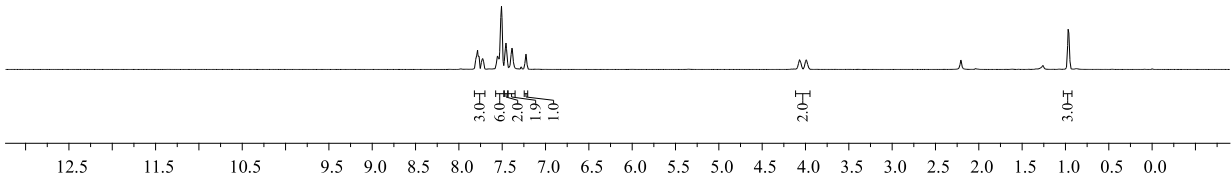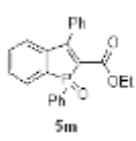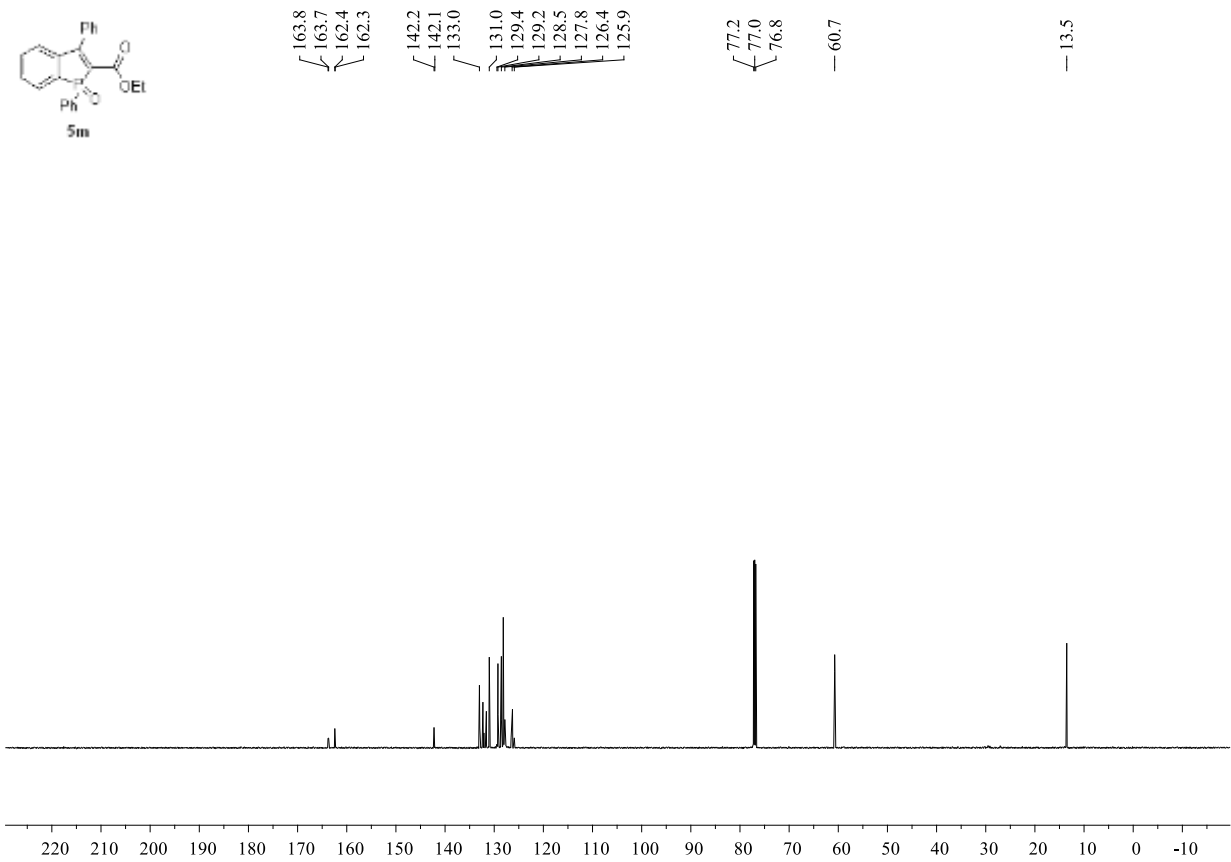

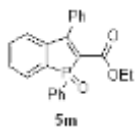

— 35.8

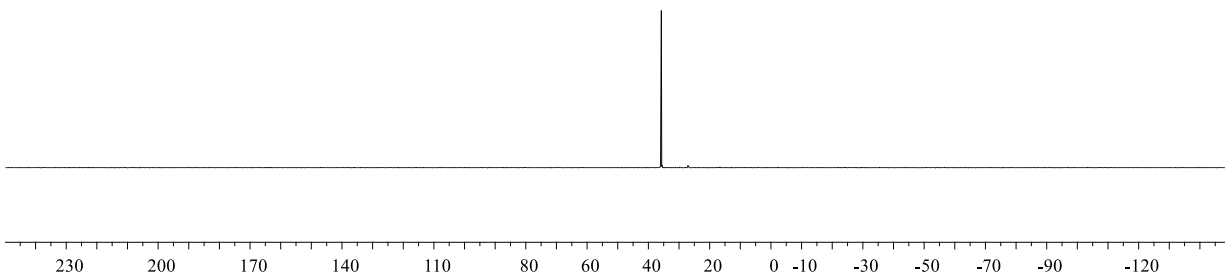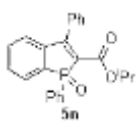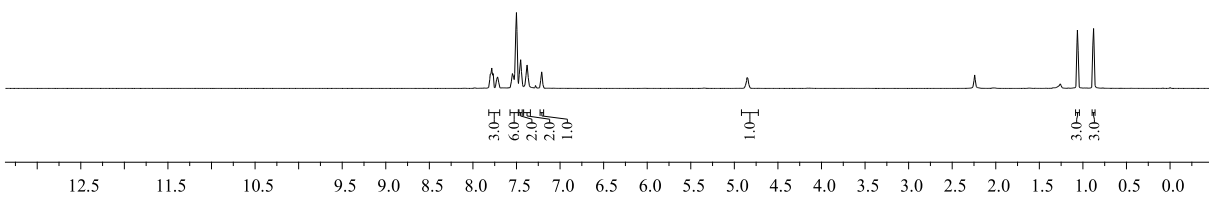

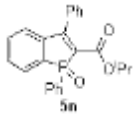

163.2  
163.1  
162.0  
161.9

142.3  
142.1  
133.0  
132.2  
131.5  
129.5  
129.1  
128.5  
127.1  
126.2

77.2  
77.0  
76.8  
-68.6

21.3  
21.2

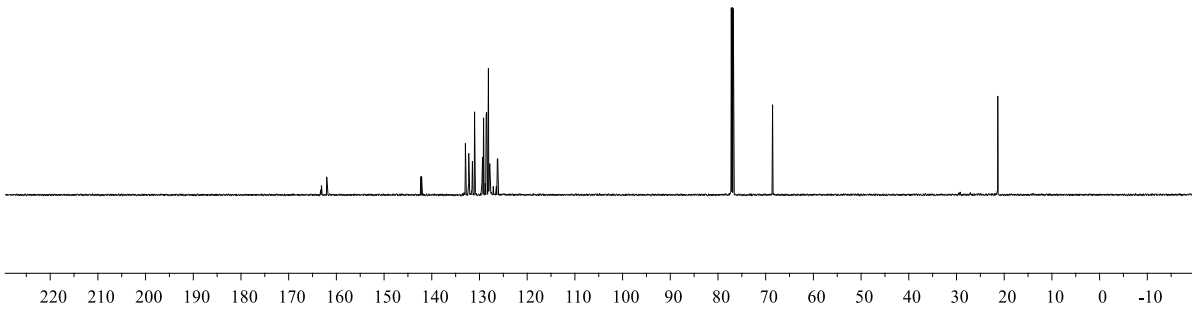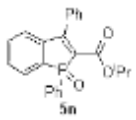

-35.7

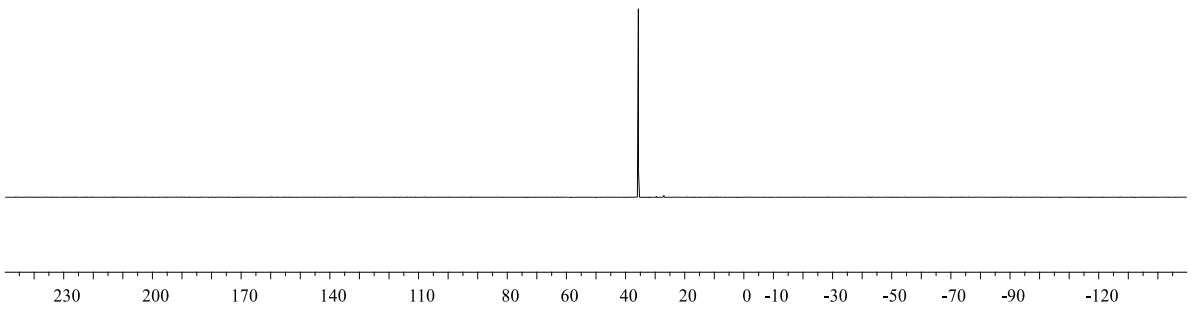

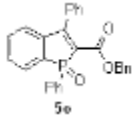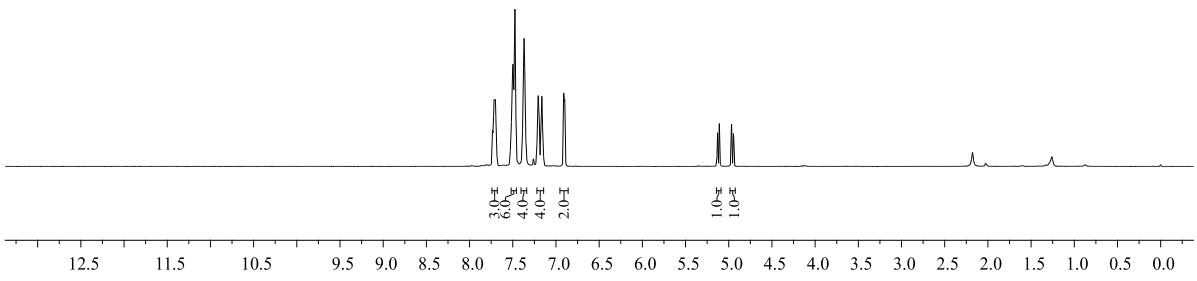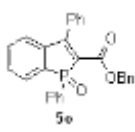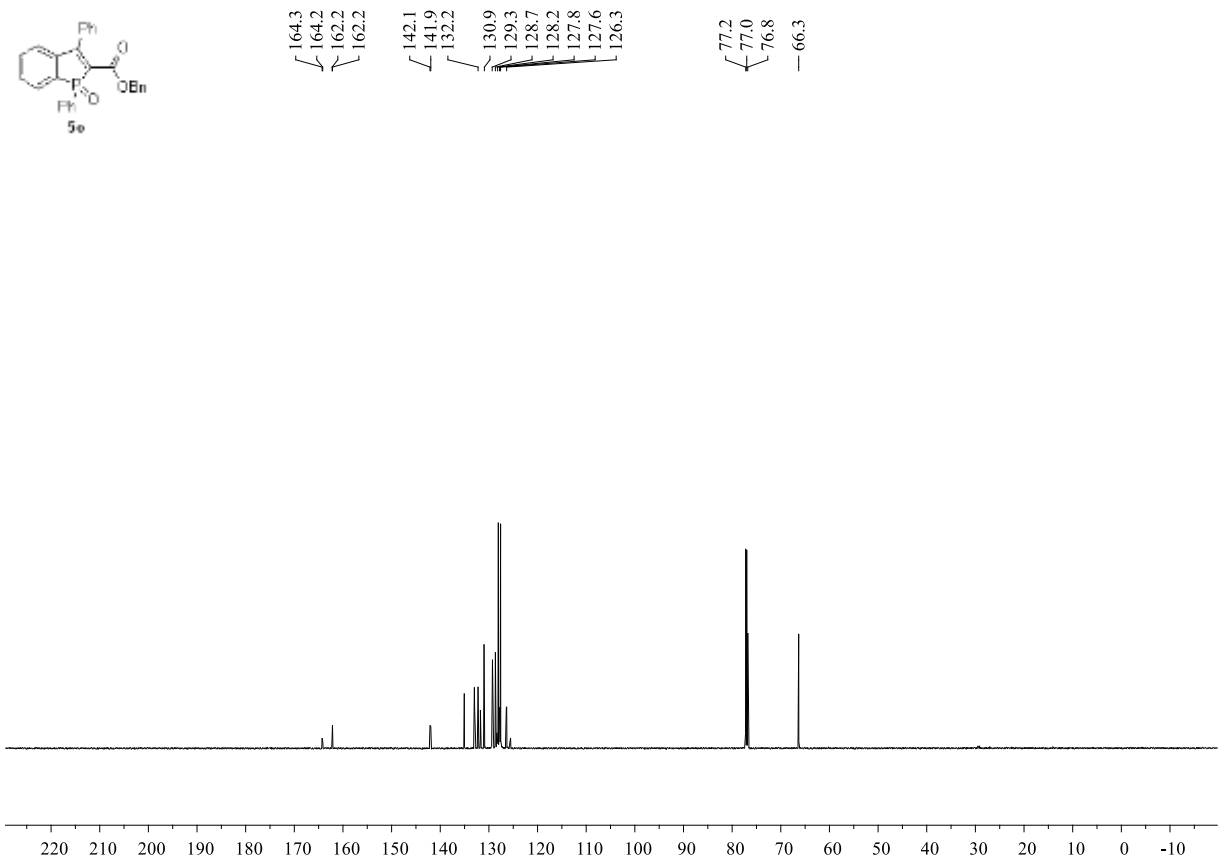

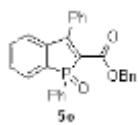

—35.7

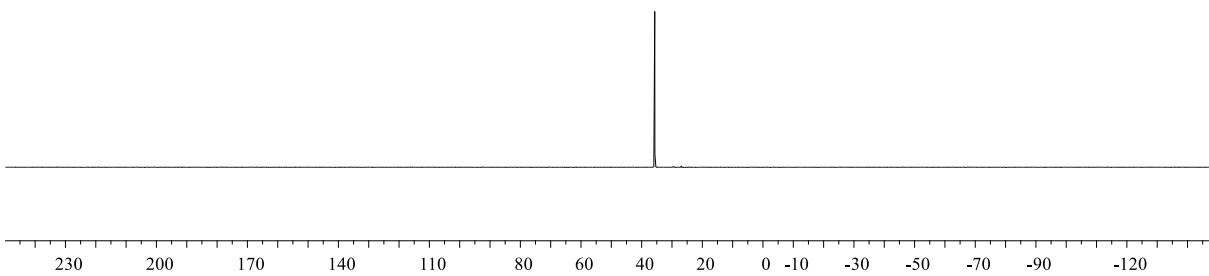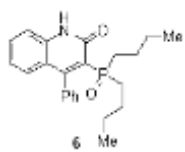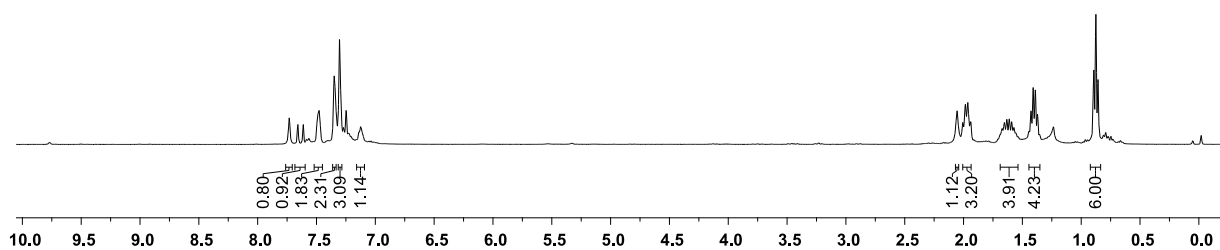

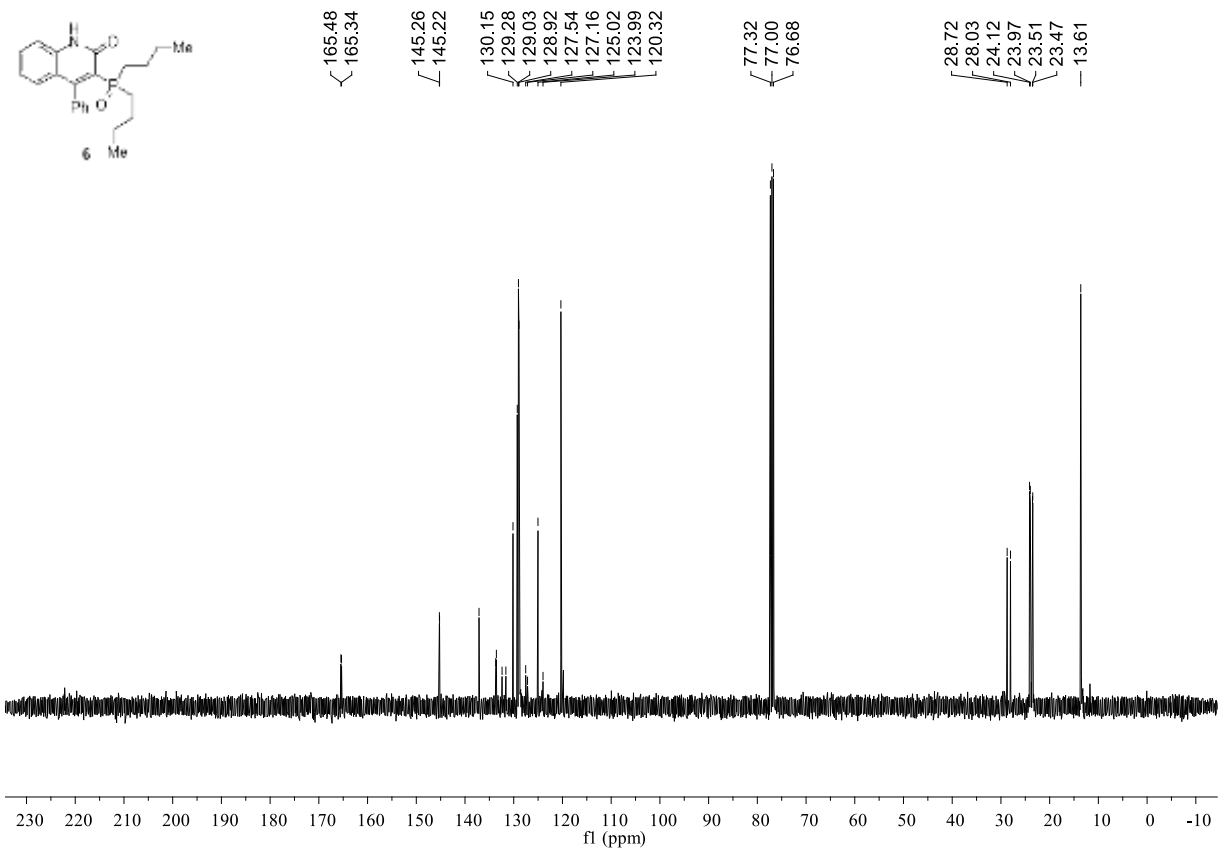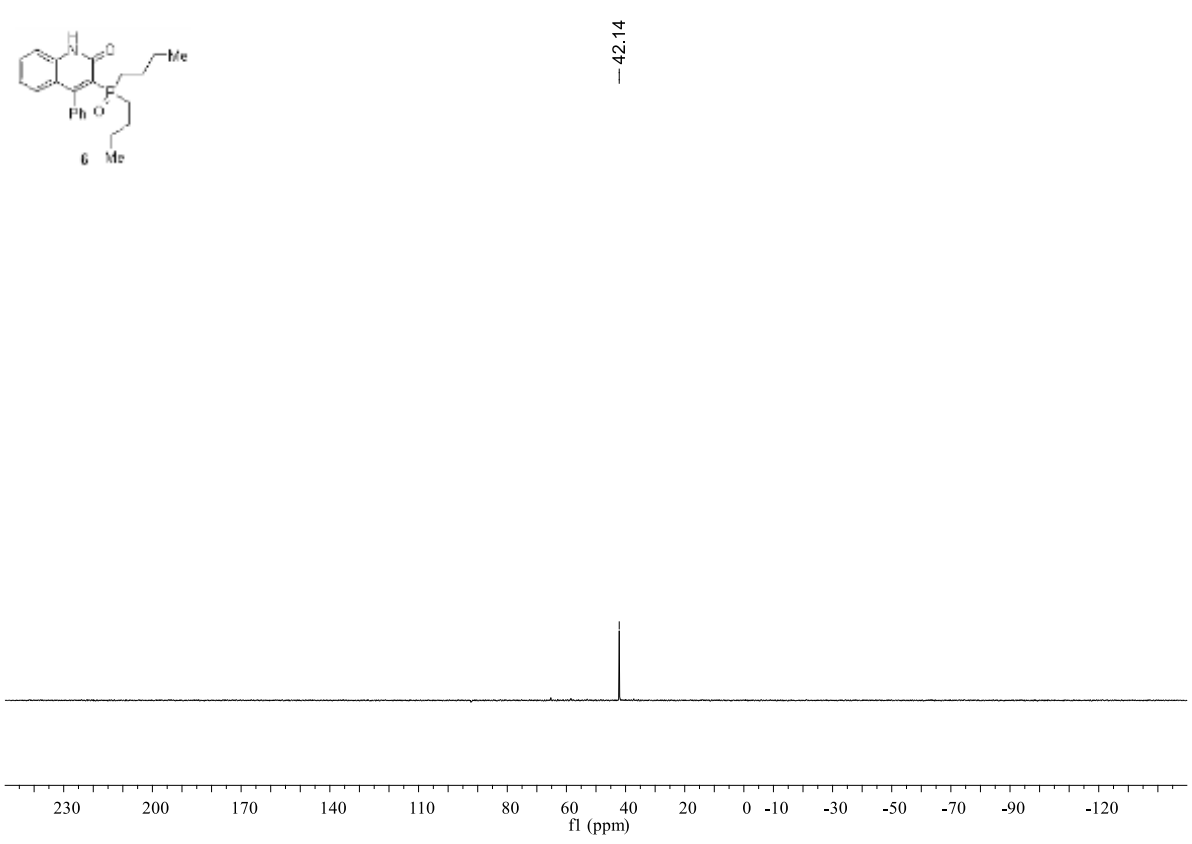

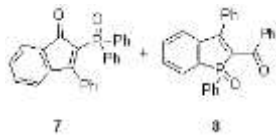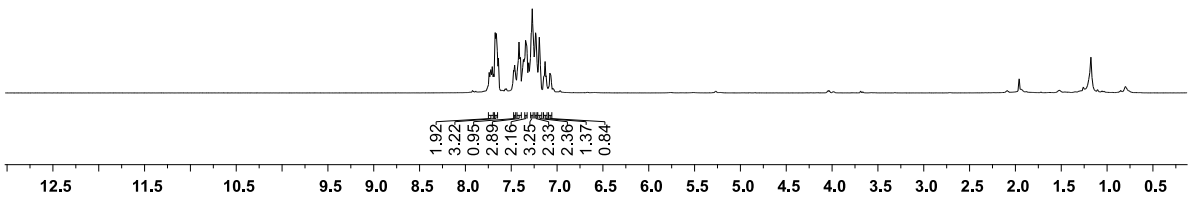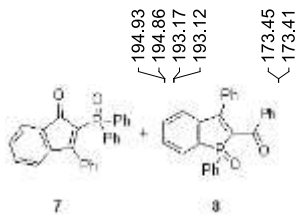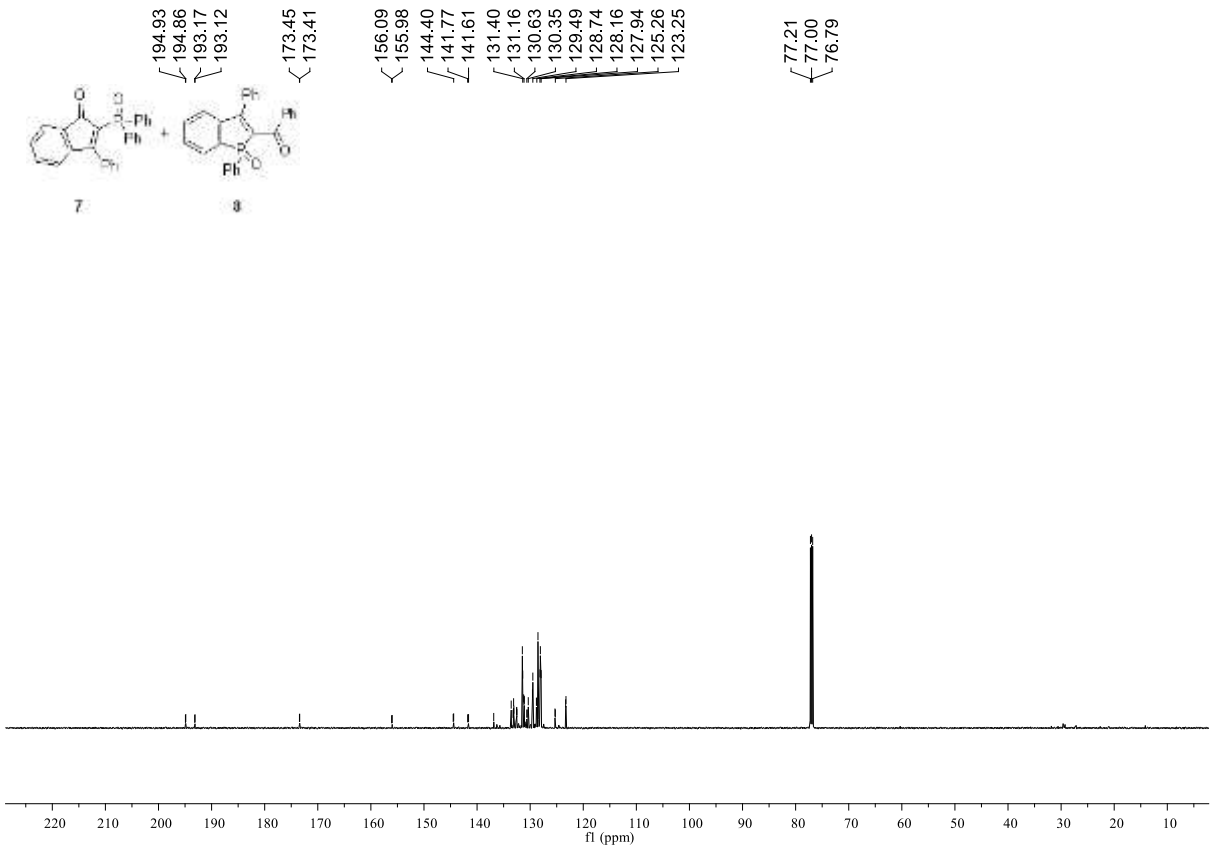



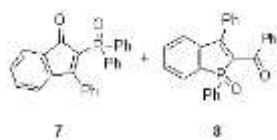

— 38.2  
— 18.3

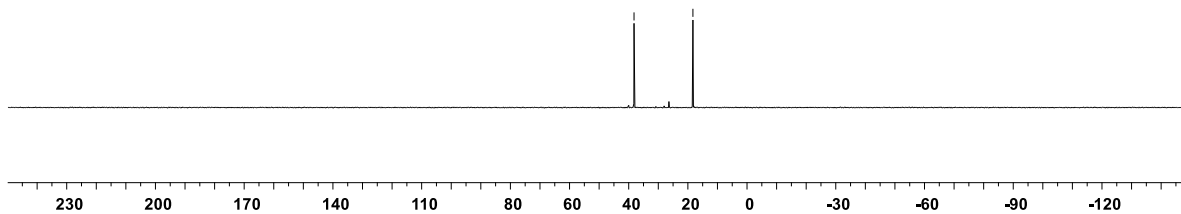

## 8. X-ray Structure of 3i

Slow diffusion of petrol ether into a solution of **3i** in EtOAc gave crystals that were suitable for X-ray diffraction:

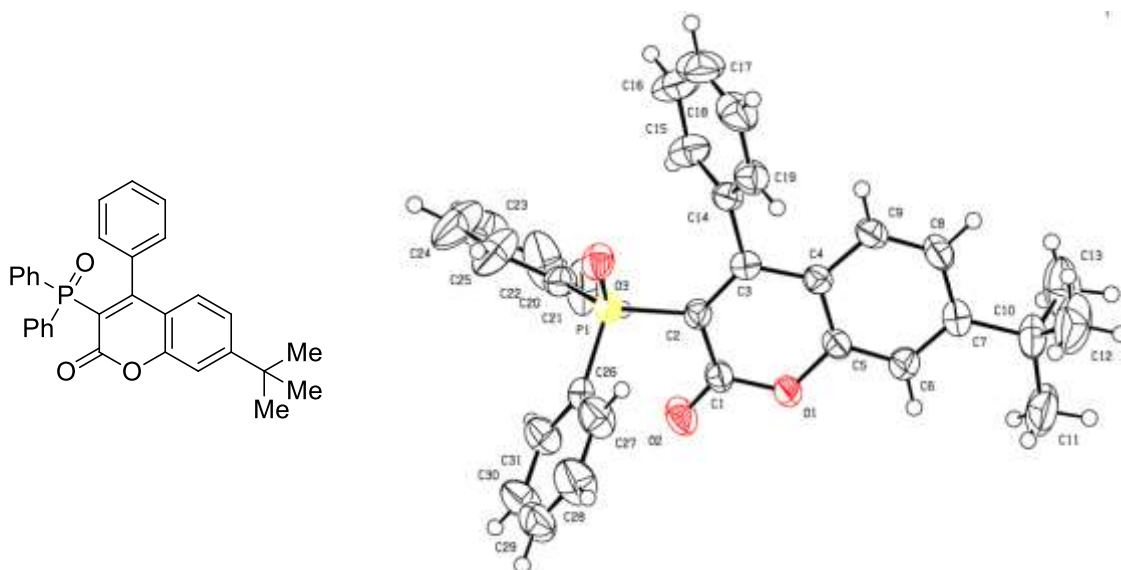

**3i**: CCDC 1921050

|                                              |                                                                                                                        |                                                           |                                                      |
|----------------------------------------------|------------------------------------------------------------------------------------------------------------------------|-----------------------------------------------------------|------------------------------------------------------|
|                                              | Product                                                                                                                | Crystal size(mm)                                          | 0.24 x 0.24 x 0.20                                   |
| Empirical formula                            | C <sub>31</sub> H <sub>27</sub> O <sub>3</sub> P                                                                       | $\theta$ range for data collection                        | 2.40 to 27.41 °                                      |
| Formula weight                               | 478.50                                                                                                                 | $h, k, l$ ranges                                          | -22 ≤ $h$ ≤ 22,<br>-14 ≤ $k$ ≤ 17,<br>-14 ≤ $l$ ≤ 14 |
| Temperature(K)                               | 273(2)                                                                                                                 | Reflections collected /<br>unique                         | 5795 / 3909<br>[R(int) = 0.0565]                     |
| Wavelength(Å)                                | 0.71073                                                                                                                | Completeness                                              | 99.7%                                                |
| Crystal system                               | monoclinic                                                                                                             | Absorption correction                                     | None                                                 |
| space group                                  | p 1 21/c 1                                                                                                             |                                                           |                                                      |
| Unit cell dimensions                         | a = 17.0617(8) Å<br>b = 13.6110(6) Å<br>c = 11.3034(6) Å<br>$\alpha$ = 90°<br>$\beta$ = 106.030(2) °<br>$\gamma$ = 90° | Data / restraints /<br>parameters                         | 5795/ 0 / 319                                        |
| Volume(Å <sup>3</sup> )                      | 2522.9(2)                                                                                                              | Goodness-of-fit on $F^2$                                  | 1.052                                                |
| Z                                            | 4                                                                                                                      | Final $R$ indices [ $I > 2\sigma(I)$ ]                    | $R_1 = 0.0565$ ,<br>$wR_2 = 0.1596$                  |
| Calculated<br>density(g·cm <sup>-3</sup> )   | 1.260                                                                                                                  | $R$ indices<br>(all data)                                 | $R_1 = 0.0933$ ,<br>$wR_2 = 0.1298$                  |
| Absorption<br>coefficient(mm <sup>-1</sup> ) | 0.140                                                                                                                  | Largest diff. peak and<br>hole( $e \cdot \text{Å}^{-3}$ ) | 0.601 and -0.405                                     |
| F(000)                                       | 1008.9                                                                                                                 |                                                           |                                                      |

## 9. X-ray Structure of 5g

Slow diffusion of petrol ether into a solution of **5g** in EtOAc gave crystals that were suitable for X-ray diffraction:

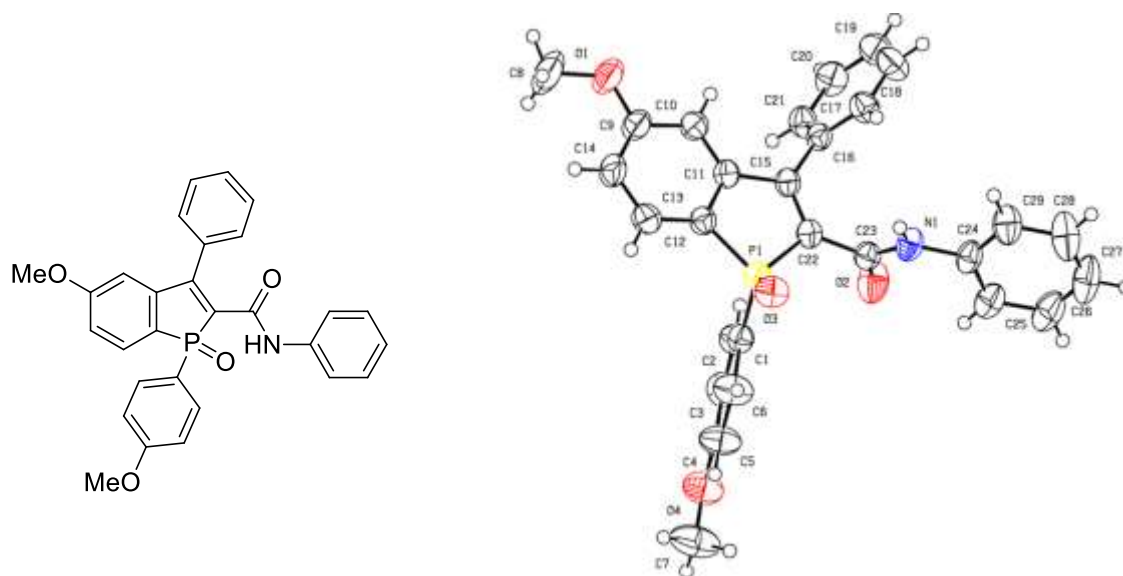

**5g**: CCDC 1921043

|                                              |                                                                                                                         |                                                           |                                                      |
|----------------------------------------------|-------------------------------------------------------------------------------------------------------------------------|-----------------------------------------------------------|------------------------------------------------------|
|                                              | Product                                                                                                                 | Crystal size(mm)                                          | 0.28 x 0.26 x 0.24                                   |
| Empirical formula                            | C <sub>29</sub> H <sub>24</sub> NO <sub>4</sub> P                                                                       | $\theta$ range for data collection                        | 2.40 to 24.67 °                                      |
| Formula weight                               | 481.49                                                                                                                  | $h, k, l$ ranges                                          | -23 ≤ $h$ ≤ 29,<br>-13 ≤ $k$ ≤ 14,<br>-26 ≤ $l$ ≤ 26 |
| Temperature(K)                               | 273                                                                                                                     | Reflections collected /<br>unique                         | 5688 / 3639<br>[R(int) = 0.0552]                     |
| Wavelength(Å)                                | 0.71073                                                                                                                 | Completeness                                              | 99.7%                                                |
| Crystal system                               | monoclinic                                                                                                              | Absorption correction                                     | None                                                 |
| space group                                  | C 1 2/c 1                                                                                                               |                                                           |                                                      |
| Unit cell dimensions                         | a = 22.6531(10) Å<br>b = 11.2558(4) Å<br>c = 20.1149(9) Å<br>$\alpha$ = 90°<br>$\beta$ = 105.379(1) °<br>$\gamma$ = 90° | Data / restraints /<br>parameters                         | 5688/ 0 / 318                                        |
| Volume(Å <sup>3</sup> )                      | 4945.2(4)                                                                                                               | Goodness-of-fit on $F^2$                                  | 1.076                                                |
| Z                                            | 8                                                                                                                       | Final $R$ indices [ $I > 2\sigma(I)$ ]                    | $R_1$ = 0.1032,<br>$wR_2$ = 0.1239                   |
| Calculated<br>density(g·cm <sup>-3</sup> )   | 1.293                                                                                                                   | $R$ indices<br>(all data)                                 | $R_1$ = 0.0552,<br>$wR_2$ = 0.1457                   |
| Absorption<br>coefficient(mm <sup>-1</sup> ) | 0.147                                                                                                                   | Largest diff. peak and<br>hole( $e \cdot \text{Å}^{-3}$ ) | 0.379 and -0.595                                     |
| F(000)                                       | 2017.8                                                                                                                  |                                                           |                                                      |

## 10. X-ray Structure of 5j

Slow diffusion of petrol ether into a solution of **5j** in EtOAc gave crystals that were suitable for X-ray diffraction:

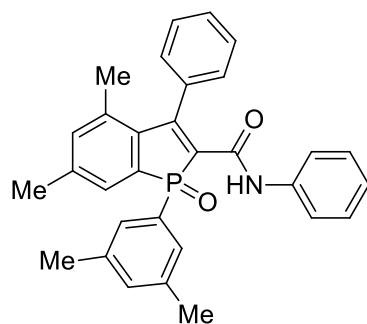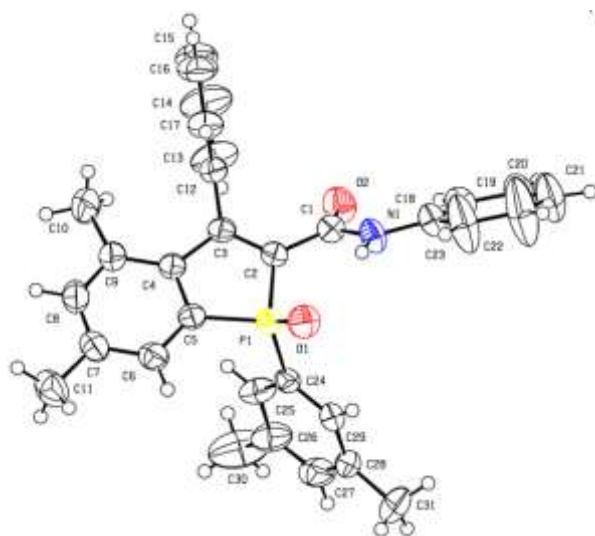

**5j**: CCDC 1921051

|                                              |                                                                                                                                       |                                                                  |                                                      |
|----------------------------------------------|---------------------------------------------------------------------------------------------------------------------------------------|------------------------------------------------------------------|------------------------------------------------------|
|                                              | Product                                                                                                                               | Crystal size(mm)                                                 | 0.28 x 0.24 x 0.24                                   |
| Empirical formula                            | C <sub>31</sub> H <sub>28</sub> NO <sub>2</sub> P                                                                                     | $\theta$ range for data collection                               | 2.37 to 24.71 °                                      |
| Formula weight                               | 477.51                                                                                                                                | $h, k, l$ ranges                                                 | -13 ≤ $h$ ≤ 13,<br>-13 ≤ $k$ ≤ 13,<br>-16 ≤ $l$ ≤ 16 |
| Temperature(K)                               | 273(2)                                                                                                                                | Reflections collected /<br>unique                                | 6000/ 2961<br>[R(int) = 0.0468]                      |
| Wavelength(Å)                                | 0.71073                                                                                                                               | Completeness                                                     | 99.1%                                                |
| Crystal system                               | triclinic                                                                                                                             | Absorption correction                                            | None                                                 |
| space group                                  | P -1                                                                                                                                  |                                                                  |                                                      |
| Unit cell dimensions                         | a = 10.4035(16) Å<br>b = 10.5900(16) Å<br>c = 13.0053(19) Å<br>$\alpha$ = 89.785(5)°<br>$\beta$ = 77.673(5)°<br>$\gamma$ = 69.240(4)° | Data / restraints /<br>parameters                                | 6000 / 0 / 315                                       |
| Volume(Å <sup>3</sup> )                      | 1304.9(3)                                                                                                                             | Goodness-of-fit on $F^2$                                         | 1.049                                                |
| Z                                            | 2                                                                                                                                     | Final $R$ indices [ $I > 2\sigma(I)$ ]                           | $R_1 = 0.0769$ ,<br>$wR_2 = 0.1530$                  |
| Calculated<br>density(g·cm <sup>-3</sup> )   | 1.215                                                                                                                                 | $R$ indices<br>(all data)                                        | $R_1 = 0.1858$ ,<br>$wR_2 = 0.1994$                  |
| Absorption<br>coefficient(mm <sup>-1</sup> ) | 0.133                                                                                                                                 | Largest diff. peak and<br>hole(e <sup>-</sup> ·Å <sup>-3</sup> ) | 0.736 and -0.658                                     |
| F(000)                                       | 348.0                                                                                                                                 |                                                                  |                                                      |
